# 1 **Greenhouse conditions in Lower Eocene coastal wetlands? –** 2 **Lessons from Schöningen, Northern Germany**

3 Olaf K. Lenz<sup>1</sup>, Walter Riegel<sup>2</sup>, Volker Wilde<sup>2</sup>,

4 <sup>1</sup>General Directorate, Senckenberg Society for Nature Research, Frankfurt am Main, Germany.

5 <sup>2</sup>Department Palaeontology and Historical Geology, Senckenberg Research Institute and Natural History  
6 Museum, Frankfurt am Main, Germany.

7  
8 \*Corresponding author

9 E-mail: [olaf.lenz@senckenberg.de](mailto:olaf.lenz@senckenberg.de) (OL)

10

## 11 **Author contributions**

12 Conceptualization: Olaf K. Lenz, Walter Riegel, Volker Wilde

13 Data Curation: Olaf K. Lenz

14 Formal Analysis: Olaf K. Lenz

15 Funding Acquisition: Olaf K. Lenz

16 Investigation: Olaf K. Lenz, Walter Riegel, Volker Wilde

17 Methodology: Olaf K. Lenz, Walter Riegel, Volker Wilde

18 Project Administration: Olaf K. Lenz, Volker Wilde

19 Resources: Olaf K. Lenz, Walter Riegel, Volker Wilde

20 Validation: Olaf K. Lenz

21 Visualization: Olaf K. Lenz

22 Writing – Original Draft Preparation: Olaf K. Lenz

23 Writing – Review & Editing: Walter Riegel, Volker Wilde

## 24 **Abstract**

25 The Paleogene succession of the Helmstedt Lignite Mining District in Northern Germany includes  
26 coastal peat mire records from the latest Paleocene to the middle Eocene at the southern edge of  
27 the Proto-North Sea. Therefore, it covers the different long- and short-term climate perturbations  
28 of the Paleogene greenhouse. 56 samples from three individual sections of a Lower Eocene seam  
29 in the record capture the typical succession of the vegetation in a coastal wetland during a period  
30 that was not affected by climate perturbation. This allows to distinguish facies-dependent  
31 vegetational changes from those that were climate induced. Cluster analyses and NMDS of well-  
32 preserved palynomorph assemblages reveal four successional stages in the vegetation during peat  
33 accumulation: (1) a near-coastal vegetation, (2) a lowland mire, (3) a transitional mire, and (4) a  
34 terminal mire. Biodiversity measures show that plant diversity decreased significantly in the  
35 successive stages. The highly diverse vegetation at the coast and in the adjacent lowland mire was  
36 replaced by low diversity communities adapted to wet acidic environments and nutrient deficiency.  
37 The palynomorph assemblages are dominated by elements such as *Alnus* or *Sphagnum*. Typical  
38 tropical elements which are characteristic for the Middle Eocene part of the succession are missing.  
39 This indicates that a more temperate climate prevailed in northwestern Germany during the early  
40 Lower Eocene.

41

42

43

44

45

## 46 **Introduction**

47 The long-term warming trend of the early Paleogene greenhouse climate climaxed in the Early  
48 Eocene Climatic Optimum (EECO) between *c.* 52 and 50 Ma before present (BP) [1]. It was  
49 interrupted by short-term warming events, the most prominent of which was the Paleocene-Eocene  
50 Thermal Maximum (PETM or ETM-1, e.g., [2-4]), a sudden temperature peak at the transition  
51 from the Paleocene to the Eocene, which is estimated to have lasted about 170.000 years [5]. Other  
52 short-term events followed, such as the ETM-2 (*c.* 53.6 Ma BP [6,7]) and the ETM-3 (X- or K-  
53 event; *c.* 52.5 Ma BP [8,9]), but did not reach the intensity of the PETM.

54 The sedimentary succession of the former Helmstedt Lignite Mining District, which  
55 includes the mines at Schöningen, covers the entire Paleogene greenhouse phase and its gentle  
56 demise from the latest Paleocene to the Middle Eocene in the so-called Helmstedt Embayment at  
57 the southern edge of the Proto-North Sea. This offers the unique opportunity to trace the effects of  
58 all the long- and short-term climate perturbations on Paleogene terrestrial ecosystems across more  
59 than 10 million years. The study is part of a current project on changes in composition of the  
60 vegetation and plant diversity in the coastal environment of the Helmstedt Embayment across the  
61 EECO and its short-term perturbations such as the PETM and ETM-2 by using pollen and spores  
62 as proxies.

63 In a number of previous studies, we have shown how the repeated and often rapid changes  
64 from marginal marine to estuarine, fluvial and terrestrial in the Late Paleocene to Middle Eocene  
65 succession at Helmstedt and Schöningen are accompanied by great changes in vegetation [10-12].  
66 However, a climatic influence and the corresponding response of the ecosystems cannot simply be  
67 revealed from the microflora as documented in the record of the Helmstedt Lignite Mining District.  
68 Multiple alternations of lignites with marine and fluvial interbeds in the section indicate significant

69 facies changes which should have been coupled with changes in vegetation. When studying climate  
70 changes and perturbations in the palynomorph record it is therefore necessary to distinguish  
71 between facies-dependent changes and changes which are merely climate-induced.

72 Isotope analyses from the lower part of the Schöningen Formation revealed an isotope  
73 excursion from the top of Seam 1 to the middle of Seam 2 including Interbed 2 [13]. As yet, it  
74 remains unclear, however, which of the Early Eocene warming events it represents and which  
75 specific floral elements are associated with the event. Carbon isotope values do not indicate a CIE  
76 excursion for Seam 1 except for the uppermost sample [13]. Therefore, Seam 1 has been deposited  
77 during a period without any perturbations of the climate and changes in vegetation were controlled  
78 by factors other than climate such as edaphic effects. Since palynological data from adjacent seams  
79 at Schöningen show similar assemblage composition and vertical trends, our data from Seam 1 can  
80 be taken as representative for a coastal plain vegetation at the southern edge of the Early Eocene  
81 Proto-North Sea. This opens the opportunity to determine more precisely the composition of the  
82 regional flora outside of warming events and its variability prior to identifying strictly climatic  
83 signals. We selected Seam 1, for which three individual sections were available from the  
84 Schöningen outcrops and studied them palynologically including multivariate statistical analyses  
85 and biodiversity measures.

86

## 87 **Geological setting**

88 The Helmstedt Lignite Mining District is situated within the Paleogene Helmstedt Embayment,  
89 which represented the mouth of an estuary opening towards the Proto-North Sea (Fig 1) between  
90 major uplifts corresponding to the actual Harz Mountains to the South and the Flechtingen Rise to

91 the North [14]. The estuary at some times extended far inland towards the area of Halle and Leipzig  
92 (Leipzig Embayment [15, 16]). Due to the interaction between changes in sea level, salt withdrawal  
93 in the subsurface and climate-related changes in runoff from the hinterland the area of Helmstedt  
94 and Schöningen was subject to frequent changes between marine and terrestrial conditions,  
95 repeatedly leading to peat formation [17].

96

97 **Fig 1. Paleogeographic map of Northwestern Europe during the Lower Eocene.** The map  
98 shows the Helmstedt Embayment at the southern edge of the Proto-North Sea (H) in relation to  
99 important middle Eocene fossil localities in Germany, such as the Geiseltal (G), Messel (M), and  
100 Eckfeld (E).

101

102 Today, the Paleogene deposits of the Helmstedt Lignite Mining District are limited to two  
103 marginal synclines accompanying the more than 70 km long salt wall of Helmstedt-Staßfurt [14,  
104 18]. Both of the synclines are strongly asymmetric with steeply inclined strata away from a narrow  
105 core of Zechstein rocks while they are gently dipping on the opposite flanks. The influence of salt-  
106 withdrawal on sediment accumulation is indicated by the fact that the maximum thickness of the  
107 two lignite bearing sequences and of the individual coal seams moved towards the salt-wall with  
108 time [14, 18].

109

## 110 **Stratigraphy**

111 An approximately 400 m thick Paleogene succession in both synclines unconformably follows on  
112 Mesozoic sediments of Triassic and Lower Jurassic age (Fig 2). The position of the lignites and  
113 two major marine transgressions in the sequence suggested a subdivision of the Paleogene strata  
114 from bottom to top in Underlying Sediments (now Waseberg Formation), Lower Seam Group (now

115 Schöningen Formation), Emmerstedt Greensand (now Emmerstedt Formation), Upper Seam Group  
116 (now Helmstedt Formation) and Overlying Marine Strata (now Annenberg-, Gehlberg-, und  
117 Silberberg Formations) (Fig 2) [11,19,20].

118  
119 **Fig 2. Stratigraphic scheme of the Paleogene succession in the Western and Eastern Syncline**  
120 **at Helmstedt and Schöningen.** The age model for the succession is based on K/Ar-ages [19,21],  
121 nannoplankton zones [19], dinoflagellate zones [22] and palynological zones [23,24]. Data for  
122 global changes in Paleogene sea-level [25] and higher order orbital cyclicity (long  
123 eccentricity >589 Ma) [26] are used for a putative correlation to seams in the Schöningen Südfeld  
124 section. The asterisk points to the stratigraphic position of the studied sections

125  
126 The conventional age model (Fig 2) for the coal-bearing part of the Paleogene succession  
127 of the Helmstedt Lignite Mining District is mainly based on scattered radiometric ages from  
128 glauconites [19,21] as well as biostratigraphic data from nannoplankton [19], dinocysts [21,22] and  
129 palynomorphs [23,24]. The data for the Schöningen-, Emmerstedt- and Helmstedt Formations were  
130 mostly derived from wells near Helmstedt in the Eastern Syncline and have simply been transferred  
131 to both synclines in the rest of the area. They suggest a Lower Eocene (Ypresian) age for the  
132 Schöningen Formation and a Middle Eocene (Lutetian) age for the Helmstedt Formation.

133 More recent results on quantitative data for the dinoflagellate cyst genus *Apectodinium* and  
134 carbon isotopes from the section at Schöningen in the western syncline indicate that the lowermost  
135 part of the Schöningen Formation may still be of Paleocene age [11,13]. Furthermore, this age  
136 model appears consistent when the succession of seams at Schöningen is compared to global  
137 changes in Paleogene sea-level and higher order cyclicity [11].

138           The Schöningen Formation as exposed in the opencast mine Schöningen-Südfeld (Fig 3) of  
139 the Western Syncline has a thickness of about 155 m, including 9 almost continuous seams (Main  
140 Seam and Seam 1 to Seam 9) and some other seams of limited extent, including Seam “L” and the  
141 “*Sphagnum* Seam” [11,27]. The Emmerstedt Formation cannot be identified at Schöningen since  
142 the characteristic greensand is missing.

143  
144 **Fig 3. The Helmstedt Lignite Mining District.** (A) The former opencast mines at Helmstedt and  
145 Schöningen. The blue frame marks the detail presented in (B). The red line indicates the salt wall  
146 separating the Western and Eastern Synclines. (B) The former opencast mines Schöningen  
147 Nordfeld and Schöningen Südfeld east of Schöningen. The positions of the three studied sections  
148 of Seam 1 are indicated.

149  
150           Due to a lack of radiometric dates and relevant biostratigraphic information, the exact  
151 position of both, the Paleocene-Eocene boundary and the Ypresian-Lutetian boundary still remain  
152 unknown at Schöningen. The frequency of *Apectodinium* spp. just above Seam 1 [11,13] has been  
153 discussed as indicating the Paleocene-Eocene Thermal Maximum (PETM) (see [28-34]). However,  
154 the marker species of the PETM in open marine environments *A. augustum* [28], now *Axiodinium*  
155 *augustum* [35], is not found among the countless *Apectodinium* cysts above Seam 1 [13].  
156 Furthermore, since *Apectodinium* acmes occur in marginal marine areas in the North Sea basin also  
157 at other times during the Early and Middle Eocene [36] the distinct carbon isotope excursion (CIE)  
158 co-occurring with the *Apectodinium* acme in Interbed 2 cannot unequivocally be related to the  
159 PETM and may point to another later warming event [13]. Thus, Seam 1, which is in the focus of  
160 our study, cannot be unambiguously dated at the moment.

161

## 162 **Methods**

### 163 **Sampling and sample processing**

164 Three sections of Seam 1 have been studied (Figs 3 and 4) in now abandoned opencast mines in  
165 the western syncline at Schöningen. Section N (14 samples) was located in mine Schöningen-  
166 Nordfeld (52°09'23.8"N 10°58'44.0"E), while the sections S1 (12 samples) and S2 (30 samples)  
167 were taken in mine Schöningen-Südfeld (S1: 52°08'07.1"N 10°59'29.7"E; S2: 52°08'27.9"N  
168 10°59'24.5"E). The palynological data of sections S1 und S2 are based on new quantitative counts  
169 while the analysis of section N is based on unpublished data of Hammer-Schiemann (1998,  
170 unpublished dissertation, University of Göttingen).

171

172 **Fig 4. Lithological logs of the three studied sections of Seam 1.** Section N is located in mine  
173 Schöningen Nordfeld, sections S1 and S2 are from mine Schöningen Südfeld. Grain size  
174 distribution is based on field observation. Numbers indicate palynological samples.

175

176 Most of the lithological units of the lignite succession in the three sections are represented  
177 in the present study by a single sample at least. In order to include the interbed/seam transitions,  
178 seven samples from the underlying Interbed 1 and the succeeding Interbed 2 have been studied in  
179 addition (Fig 4).

180 Palynological preparation followed the standard procedures as described by [37] including  
181 the successive treatment with hydrochloric acid (HCl), hydrofluoric acid (HF), hydrogen peroxide  
182 (H<sub>2</sub>O<sub>2</sub>) and potassium hydroxide (KOH). Flocculating organic matter was removed by briefly  
183 oxidizing the residue with nitric acid (HNO<sub>3</sub>) or hydrogen peroxide (H<sub>2</sub>O<sub>2</sub>) after sieving with a



184 mesh size of 10  $\mu\text{m}$ . Remaining sample material and slides are stored at the Senckenberg  
185 Forschungsinstitut und Naturmuseum, Sektion Paläobotanik, Frankfurt am Main, Germany.

## 186 **Quantitative palynological analysis**

187 Numerical analyses of palynological data are based on quantitative palynomorph counts. At least  
188 300 individual palynomorphs per sample were identified and counted at 400 times magnification  
189 to obtain a representative dataset for statistical analysis. A complete list of all palynomorphs  
190 encountered during the present study with full names including authors is presented in the  
191 taxonomic list (S1 Appendix). Furthermore, raw data values for section N (S1 Table), section S1  
192 (S2 Table) and section S2 (S3 Table) are presented in the appendix. Identification of palynomorphs  
193 is based on the systematic-taxonomic studies of [10,38-41].

194 Despite the good preservation of palynomorphs 5-10% of the total assemblages could not  
195 be identified and have been counted as "Varia". To minimize potential errors in identification and  
196 counting of individual species some morphologically similar taxa have been lumped in the pollen  
197 diagrams and for statistical analysis, such as, e.g., different species of the genera *Triporopollenites*  
198 or *Triatriopollenites*. In total, 45 groups of palynomorphs have been distinguished (see S1  
199 Appendix). In order to get robust data for diversity analyses the slides from section S1 were  
200 additionally scanned for rare taxa that were not recorded during routine counting.

201 The pollen diagrams show the abundance of the most important palynomorphs in  
202 percentages. They are arranged according to their score along the first axis (sections N, S2) or the  
203 second axis (section S1) of an NMDS gradient analysis. Pollen and spores were calculated to 100%,  
204 whereas algae, such as *Botryococcus*, dinoflagellates and other organic residues, such as fungal  
205 remains, cuticles or charcoal were added as additional percentages (in % of the total sum of pollen  
206 and spores).

## 207 **Statistical analysis**

208 Statistical analyses followed a routine which has already been applied by the authors in previous  
209 studies [42,43]. We used Wisconsin double standardized raw data values [44-47]. Wisconsin  
210 standardization scales the abundance of each taxon or group of taxa to their maximum values and  
211 represents the abundance of each of these palynological variables by its proportion in the sample  
212 [48]. This equalizes the effects of rare and abundant taxa and removes the influence of sample size  
213 on the analysis [44,45].

214 For the robust zonation of the pollen diagrams of the three sections and to identify samples  
215 with similar palynomorph contents, Q-mode cluster analysis was established using the unweighted  
216 pair-group average (UPGMA) method and the Bray-Curtis distance (software PAST 3.26 [49]).  
217 Furthermore, to illustrate compositional differences and ecological trends in Seam 1, and to  
218 visualize the level of similarity between samples, non-metric multidimensional scaling (NMDS)  
219 with the standardized raw data values and the Bray-Curtis dissimilarity [44,50] has been performed  
220 for each of the three studied sections as well as for the complete data set using the software PAST  
221 3.26 [49]. NMDS is the most robust unconstrained ordination method in ecology [51] and has been  
222 successfully applied to palynological data in previous studies (e.g., [42,48,52-54]. It avoids the  
223 assumption of a linear or unimodal response model between the palynomorph taxa and the  
224 underlying environmental gradients as well as the requirement of normal distributed data.

## 225 **Diversity analysis**

226 In addition to the quantitative analysis of the 45 groups of palynomorphs that are presented in the  
227 pollen diagrams, in section S1 the palynomorph assemblage has been studied with the highest  
228 possible taxonomic resolution allowing a detailed analysis of the diversity of the microflora (S4  
229 Table). For diversity analysis, morphologically distinct pollen “species” were recorded

230 representing the morpho-diversity of the palynomorph assemblage. However, these morpho-types  
231 do not necessarily reflect different parent plants and may also include morphological variation  
232 within the same plant family or genus. Furthermore, morphological diversity within a natural  
233 species may include different morpho-types [55]. Nevertheless, since this affects all samples to the  
234 same extent, the diversity measures still lead to a robust picture of the diversity of the parent  
235 vegetation.

236 To estimate the changes in taxonomic diversity between single samples and different pollen  
237 zones (PZs) within seam 1, several calculations for species richness and evenness were applied,  
238 using tools for biodiversity analysis as provided by [56,57]. Richness is simply the number of taxa  
239 within an ecosystem, which is here calculated as the total number of palynological taxa within a  
240 sample or a PZ [58]. It can be measured at different scales, for which mainly the three terms alpha,  
241 beta, and gamma diversity have been used [59]. The definitions of these terms were originally  
242 based on the comparison of diversity in different areas or regions. Here, we use these terms to  
243 describe the temporal comparison of diversity changes within Seam 1. Furthermore, we use the  
244 term point diversity (within-sample diversity resp. standing richness of [60]) for the richness within  
245 a single sample which reflects the total number of taxa as found in the counted number of individual  
246 grains [61]. Alpha diversity is regularly related to the diversity within a community or habitat [61]  
247 and is here used as a measure for diversity within a PZ, since this represents a specific community  
248 during the evolution of the vegetation in Seam 1. Gamma diversity normally includes the species  
249 richness in a larger area within a landscape [61] but is here used as a measure for the richness in  
250 the complete seam summarizing the vegetation of its peat-forming communities at Schöningen.  
251 Beta diversity is linking alpha and gamma diversities and is here used as a measure of the difference  
252 in species composition between two samples, within a specific PZ or within the whole seam [59,61-  
253 63]. Here we adapt Whittaker's [59,64] original suggestion for calculating beta diversity, which is

254 most frequently employed in ecological studies [65]. For comparison between two samples, beta  
255 diversity is calculated by the total number of species within the two samples divided by the average  
256 species number within the two samples. Beta diversity calculations within a PZ and within Seam 1  
257 are calculated as the total species number within the specific PZ or the whole seam divided by the  
258 average species number in samples from the PZ/Seam 1. We applied software PAST 3.26 [49] for  
259 calculation of point and beta diversity as well as EstimatesS v. 9.1.0 [57] for the analysis of alpha  
260 and gamma diversity.

261 Species richness cannot directly be estimated by observation and not accurately measured,  
262 because the observed number of species in a sample is always a downward-biased estimator for the  
263 complete species richness in an assemblage [66]. Therefore, the calculation of the number of  
264 palynological species within a single sample or a PZ in the succession of Seam 1 is always an  
265 underestimate of the possible number of species. Nevertheless, the calculated richness values can  
266 be used as reliable information at least on relative changes of point and alpha diversity.

267 Evenness is the distribution of pollen taxa within a pollen assemblage [61]. A low evenness  
268 indicates an assemblage with one or more dominant taxa, characterized by high numbers of pollen  
269 grains of the same types, whereas high evenness points to an assemblage without dominant taxa,  
270 indicated by equally distributed taxa [67]. Evenness (E) has been calculated using the formula  
271 provided by [58] ( $E = H/\ln(R)$ ) producing evenness values between 0 (low evenness) and 1 (high  
272 evenness). For Shannon-Wiener index (H) and richness (R) we used the estimations provided by  
273 [56] based on calculations for point diversity within 300 counts, for alpha diversity within 5  
274 samples and for gamma diversity within 20 samples (Tables 1 and 2).

## 275 **Results**

### 276 **Palynozones**

277 Based on unconstrained Q-mode cluster analysis (Figs 5B, 6B, 7B) five distinct assemblages have  
278 been recognized in our study, which can be distinguished by NMDS (Figs 5C, 6C, 7C). They are  
279 arranged as palynozones (PZ) in a vertical succession, which shows that the general development  
280 of the vegetation was identical in the three sections of Seam 1. Variations within PZs between  
281 sections indicate local differences in vegetation patterns.

282  
283 **Fig 5. Pollen diagram, cluster analysis and NMDS of section N.** (A) Pollen diagram of 14  
284 samples from the top of Interbed 1 to the base of Interbed 2 of section N showing the most important  
285 palynomorph taxa. The zonation in different PZs is based on cluster analysis (B) Result of an  
286 unconstrained cluster analysis of Wisconsin double standardized raw-data values using the  
287 unweighted pair-group average (UPGMA) method together with an Euclidean distance (C) Non-  
288 metric multidimensional scaling (NMDS) plot of palynological data using the Bray-Curtis  
289 dissimilarity and Wisconsin double standardized raw-data values. The scatter plot shows the  
290 arrangement of samples and palynomorph taxa.

291  
292 **Fig 6. Pollen diagram, cluster analysis and NMDS of section S1.** (A) Pollen diagram of 12  
293 samples from the base of seam 1 to the base of Interbed 2 of section S1 showing the most important  
294 palynomorph taxa. The zonation in different PZs is based on cluster analysis (B) Result of an  
295 unconstrained cluster analysis of Wisconsin double standardized raw-data values using the  
296 unweighted pair-group average (UPGMA) method together with an Euclidean distance (C) Non-  
297 metric multidimensional scaling (NMDS) plot of palynological data using the Bray-Curtis  
298 dissimilarity and Wisconsin double standardized raw-data values. The scatter plot shows the  
299 arrangement of samples and palynomorph taxa.

300

301 **Fig 7. Pollen diagram, cluster analysis and NMDS of section S2.** (A) Pollen diagram of 30  
302 samples from the top of Interbed 1 to the base of Interbed 2 of section S2 showing the most  
303 important palynomorph taxa. The zonation in different PZs is based on cluster analysis (B) Result  
304 of an unconstrained cluster analysis of Wisconsin double standardized raw-data values using the  
305 unweighted pair-group average (UPGMA) method together with an Euclidean distance (C) Non-  
306 metric multidimensional scaling (NMDS) plot of palynological data using the Bray-Curtis  
307 dissimilarity and Wisconsin double standardized raw-data values. The scatter plot shows the  
308 arrangement of samples and palynomorph taxa.

309  
310 PZ 1 and PZ 5 include samples from the adjacent Interbeds 1 and 2, and reflect the state of  
311 vegetation during marine-terrestrial transition. PZs 2, 3, and 4, on the other hand, represent  
312 different stages of the peat forming vegetation during seam formation.

313  
314 **Palynozone 1 (top Interbed 1)**

315 The two samples from Interbed 1 (sample N-1, Fig 5A and sample S2-1, Fig 7A) show marine  
316 influence with the occurrence of dinocysts (*Apectodinium* spp.). The NMDS of S2 samples (Fig  
317 7C) shows that sample S2-1 is clearly different from the seam, because it is plotted in the ordination  
318 space on the negative side of NMDS axis 2 together with samples of Interbed 2 (PZ 5) but separate  
319 from all of the lignite samples (PZ 2 - 4). Sample N-1 (section N, Fig 5C) is plotted in the upper  
320 right corner of the ordination space very close to samples from the base of Seam 1 (PZ 2a)  
321 indicating a more gradual change of the vegetation from marginal marine habitats to the peat-  
322 forming environment at this site.

323 The only true mangrove element *Rhizophora* (*Zonocostites ramonae*, Fig 8I), in the  
324 Schöningen Formation, occurs in low numbers in PZ 1 of section S2 and in PZ 5 of sections S1  
325 and S2. *Inaperturopollenites* spp. (Cupressaceae s.l., Figs 8A, B) dominate the pollen assemblages  
326 with values of up to 37%. Other common taxa of sample N-1 are *Tricolporopollenites cingulum*  
327 (Fagaceae, 9.4%, Figs 8C, D, E), *Plicatopollis* spp. (Juglandaceae, 7.7%, Fig 8K),  
328 *Tricolpopollenites liblarensis* (Fagaceae, Fig 8F) and *T. retiformis* (Salicaceae, Fig, 8H), each with  
329 5.1% as well as *Plicapollis pseudoexcelsus* (Juglandaceae?, 4.3%, Fig 8J).

330

331 **Fig 8. Important palynomorphs of PZs 1, 2 and 5.** (A) *Inaperturopollenites concedipites*,  
332 Cupressaceae s.l. (sample S1-12), (B) *Cupressacites bockwitzensis*, Cupressaceae s.l. (sample S1-  
333 12); (C) *Tricolporopollenites cingulum fusus*, Fagaceae (morphotype 1 with a rough exine, larger  
334 than morphotype 2; sample S1-12), (D) *Tricolporopollenites cingulum fusus*, Fagaceae  
335 (morphotype2 with a smooth exine, smaller than morphotype 1; sample S1-12), (E)  
336 *Tricolporopollenites cingulum pusillus*, Fagaceae (morphotype 2, sample S1-9), (F)  
337 *Tricolpopollenites liblarensis liblarensis*, Fagaceae (sample S1-12), (G) *Tricolpopollenites*  
338 *quisqualis*, Fagaceae (sample S1-12); (H) *Tricolpopollenites retiformis*, Salicaceae (sample S1-4);  
339 (I) *Zonocostites ramonae*, Rhizophoraceae (sample S1-8); (J) *Plicapollis pseudoexcelsus*,  
340 Juglandales (sample S1-9); (K) *Plicatopollis hungaricus*, Juglandaceae (sample S1-3); (L)  
341 *Alnipollenites verus*, Betulaceae (sample S1-3); (M) *Dicolpopollis kockeli*, Arecaceae (sample S1-  
342 3); (N), (O) *Nyssapollenites kruschii accessories*, Nyssaceae (samples S1-12, S1-3); (P)  
343 *Ilexpollenites iliacus*, Aquifoliaceae (sample S1-4); scale bars: 10µm

344

345 In sample S2-1 *Plicatopollis* spp. (6.7%) and *P. pseudoexcelsus* (8.0%) are also very  
346 common, while the fagaceous taxa *T. liblarensis* and *T. cingulum* as well as *T. retiformis* are less  
347 frequent compared to sample N-1.

## 348 **Palynozone 2 (Seam 1)**

349 PZ 2 (Figs 5A, 6A, 7A) includes the lower part of Seam 1 and can be subdivided into two subzones  
350 in sections N and S2. The difference to other samples of the seam is best expressed in section S2  
351 in the NMDS where samples of PZ 2 are clearly separate on the right side of the ordination space  
352 (Fig 7C). In the other two sections, samples from adjacent interbeds are closely located to PZ 2  
353 samples in the ordination space, thus, indicating the proximity of the PZ 2 pollen assemblage to  
354 Interbed 1 respectively Interbed 2 pollen assemblages (Fig 5C, resp. 6C).

355 In contrast to PZ 1, dinoflagellate cysts are completely missing in PZ 2. In the composition  
356 of the pollen assemblage the most striking change is the occurrence of *Alnipollenites verus*  
357 (Betulaceae, *Alnus*, Fig 8L), which reaches a maximum of 57.5% in section S2. Although much  
358 lower, the maxima of *A. verus*, too, occur in PZ 2: 25.3% in section N resp. 2.9% in section S1.

359 *Tricolporopollenites cingulum* (Fagaceae) is among the dominant elements in sections N  
360 and S2. In section S1 maximum values are distinctly lower, but also reached in PZ 2. Other taxa  
361 with maxima in PZ 2 are *Spinaepollis spinosus* (Euphorbiaceae?), *Nyssapollenites* spp. (Nyssaceae,  
362 Figs 8N, O) and *Ilexpollenites* spp. (Aquifoliaceae, Fig 8P). The lowest values for these taxa occur  
363 again in section S1. *Inaperturopollenites* sp. is still characterized by high values (24.6%), a slight  
364 decrease, however, from PZ 1.

365 A few taxa decrease strongly within PZ 2 and, therefore permit the separation of subzones  
366 PZ 2a and PZ 2b for sections N and S2. This is the case, in particular, for *Thomsonipollis magnificus*  
367 (unknown botanical affinity, Fig 9F) which drops from 18% in section N to near absence in PZ 2b.  
368 Similarly, the fern spores *Leiotriletes* spp. (Schizaeaceae, Figs 9B, C, D) and other trilete spores



369 disappear almost completely in PZ 2b except for a slight increase at the top of PZ 2 in section S1.  
370 These spores are replaced by in PZ 2b by other fern spores like *Laevigatosporites* spp.  
371 (Polypodiaceae, Fig 9 E), which are rare in PZ 2a.

372  
373 **Fig 9. Important palynomorphs of PZs 3 and 4.** (A) *Tricolporopollenites belgicus*, unknown  
374 botanical affinity (sample S1-2), (B) *Leiotriletes microadriennis*, Schizaeaceae (sample S1-4), (C)  
375 *Leiotriletes adriennis*, Schizaeaceae (sample S1-6), (D) *Leiotriletes paramaximus*, Schizaeaceae  
376 (sample S1-4); (E) *Laevigatosporites discordatus*, Polypodiaceae (sample S1-3); (F)  
377 *Thomsonipollis magnificus*, unknown botanical affinity (sample S1-2); (G) *Milfordia incerta*,  
378 Restionaceae (sample S1-9); (H) *Basopollis atumescens*, unknown botanical affinity (sample S1-  
379 8); (I) *Tripoporopollenites crassus*, Myricaceae (sample S1-10), (J) *Tripoporopollenites robustus*,  
380 Myricaceae (sample S1-8), (K) *Tripoporopollenites rhenanus*, Myricaceae (sample S1-8), (L)  
381 *Pompeckjoidaepollenites subhercynicus*, unknown botanical affinity (sample S1-3), (M) *Ericipites*  
382 *ericus*, Ericaceae (sample S1-11); scale bars: 10µm

383  
384 The relative loss of these taxa in PZ 2b is in part made up by increases in  
385 *Monocolpopollenites tranquillus* (Arecaceae, *Phoenix*), *Tricolpopollenites retiformis*,  
386 *Tricolporopollenites belgicus* (unknown botanical affinity, Fig 9A) and *Tricolpopollenites*  
387 *liblarensis* in section S2 (Fig 7A), in section N additionally by *Ilexpollenites* spp. (Fig 5A). The  
388 small number of samples in section S1 here precludes a subdivision of PZ 2.

### 389 **Palynozone 3 (Seam 1)**

390 PZ 3 covers the middle of Seam 1 and is represented by 4 samples each in sections N and S1 and  
391 by 3 samples in section S2. The NMDS of all sections show that samples of PZ 3 are separated  
392 from other PZs in the ordination space indicating a unique assemblage composition. Especially in

393 sections N and S2 (Fig 5C resp. 7C) the samples are plotted midway between those of PZ 2 and PZ  
394 4 indicating that the assemblages include elements from the preceding and succeeding PZs. In  
395 section S1 PZ 3 is plotted on the left side of the ordination space clearly separated from the other  
396 two seam-related PZs (Fig 6C). However, sample S1-5 is plotted far away from the other samples  
397 of PZ 3 on the negative end of NMDS axis 1 (Fig 6C) suggesting a difference in assemblage  
398 composition not readily recognized in the pollen diagram (Fig 6A).

399 *Alnipollenites verus* has virtually disappeared except for local abundance in section S2.  
400 Similarly, *Tricolporopollenites cingulum* drops from high values in section N to 10.8% and from  
401 low values in section S1 to less than 1%. Only in section S2 it remains at similar high levels. Other  
402 taxa such as *Spinaepollis spinosus*, *Ilexpollenites* spp., *Nyssapollenites* spp., and *Tricolpopollenites*  
403 *liblarensis* decrease consistently in sections N and S1 as well as *Tricolporopollenites belgicus* in  
404 section S2.

405 *Pompeckjoidaepollenites subhercynicus* (unknown botanical affinity, Fig 9L) suddenly  
406 appears with high values (up to 20.2% in section S1) and extends to the base of PZ 4 in sections N  
407 and S2. *Tripoporopollenites robustus* (Myricaceae, Figs 9I - K) as well as spores of Sphagnaceae  
408 such as *Sphagnumsporites* sp., *Tripunctisporis* sp. and, *Distancorisporis* sp. [68] (Fig 10) are  
409 abundant before becoming prevalent in PZ 4. Both, *T. robustus* and *Sphagnum*-type spores together  
410 are already prevalent in PZ 3 of section S1.

411  
412 **Fig 10. Variation of *Sphagnum*-type spores in PZs 3 and 4.** Morphological variation in  
413 *Tripunctisporis* sp. (A), (B), *Sphagnumsporites* sp. (C) and *Distancorisporis* sp. (D), (E), (F); scale  
414 bars: 10µm

415

416 Sample S1-5 (section S1) is exceptional among PZ 3 samples (Fig 6C) due to the high  
417 abundance of spores of ferns and peat mosses. More than two thirds of the palynomorphs in this  
418 sample are composed of spores. Accordingly, *P. subhercynicus* and *T. robustus* remain  
419 proportionally rare.

#### 420 **Palynozone 4 (Seam 1)**

421 PZ 4 comprises the upper part of Seam 1 and represents a significant change from the palynomorph  
422 assemblages of preceding PZs 2 and 3 (Figs 5A, 6A, 7A). This becomes particularly evident in  
423 the NMDS. In all three sections samples of PZ 4 are clearly separated from all other samples in the  
424 ordination space (Figs 5C, 6C, 7C) due to the dominance of *Sphagnum*-type spores, which reach  
425 now their maximum with values between 38% and 52%. A similar dominance is shown for  
426 myricaceous pollen, e.g., *Triporopollenites robustus/rhenanus*, with values between 23% and 30%.

427 *Pompeckjoidaepollenites subhercynicus*, a major element of PZ 3 continues with high  
428 values (up to 28%) into the lower part of PZ 4 in sections N and S2. In section S1, however, it is  
429 rare. Pollen of the Normapolles group (e.g. *Basopollis* spp., Fig 9H) and Restionaceae (*Milfordia*  
430 spp., Fig 9G) have a strong showing in PZ 4 of section S1, but together with *Ericipites* spp.  
431 (*Ericaceae*, Fig 9M) a distinct reduction over PZ 3 in section N. *Momipites punctatus* (*Juglandaceae*,  
432 *Engelhardia*) is quite common for the first time in section S2 but rare in the other two section.  
433 *Laevigatosporites* spp. are reduced in sections S1 and S2 but increase in section N. *Alnipollenites*  
434 *verus* has been virtually lost in PZ 4 of all sections.

#### 435 **Palynozone 5 (base Interbed 2)**

436 PZ 5 includes mainly samples from Interbed 2 (Figs 5A, 6A, 7A). In all sections a marine influence  
437 is indicated by the onset of the dinocysts *Apectodinium* spp. with maximum values of 65.5%. This  
438 clearly distinguishes the transition of Interbed 1 to the seam from the transition of the top of the

439 seam to Interbed 2. However, the NMDS of sections N (Fig 5C) and S2 (Fig 7C) show that the  
440 palynomorph assemblage composition of both is similar at the beginning and end of seam  
441 development. Both PZs are plotted in the ordination space in close vicinity. The NMDS of section  
442 S1 (Fig 6C), however, shows similarities in assemblage composition between PZ 5 and PZ 2 since  
443 one of the samples (S1-12) is plotted in the NMDS in the upper right corner of the ordination space.  
444 However, according to the cluster analysis, the closest similarity of S-12 is to S1-1 at the base of  
445 the seam (Fig 6B).

446 Drastic changes from PZ 4 are the disappearance of *Sphagnum*-type spores and the strong  
447 increase of *Inaperturopollenites* spp. with a maximum of 41.3% in section S1. These are similar  
448 values as in PZ 1. The pollen of the juglandaceous alliance such as *Plicapollis pseudoexcelsus* (up  
449 to 4.8%) and *Plicatopollis* spp. (up to 8.9%) as well as the fagaceous pollen *Tricolpopollenites*  
450 *liblarensis* (up to 15.5%) reach also high values that are in the range of their values within PZ 1.  
451 *Tripoporollenites robustus/rhenanus* (up to 9%) are also common, although the values strongly  
452 decrease compared to PZ 4.

453

## 454 **Non pollen/spore palynofacies (section S2)**

455 In section S2 a selection of organic particles, such as fungal remains, periderm cells, cuticle  
456 fragments, resin and tannin bodies (resinite/phlobaphinite) as well as charcoal have been  
457 quantitatively recorded in addition to palynomorphs and calculated to 100% palynomorphs (Fig  
458 11).

459

460 **Fig 11. Abundance of non-pollen/spore palynofacies elements (NPP) in section S2.** Diagram of  
461 30 samples from the top of Interbed 1 to the base of Interbed 2 of section S2 showing the

462 distribution of NPPs. The zonation of the diagram is based on unconstrained cluster analysis of  
463 palynomorph taxa (see Fig 7).

464

465 Fungal remains are common in PZ 2, albeit with wide variations in frequency between  
466 barely present and 28%. In PZ 3 and PZ 4 fungal values drop to a few percent (less than 6%) only  
467 to rise at the very top of the seam again. As may be expected, fungal remains hardly stray beyond  
468 the seam.

469 This holds true for periderm cells as well. However, contrary to fungal remains periderm  
470 cells are nearly absent in the lower part of PZ 2 (PZ 2a) but rise markedly at the base of PZ 2b.  
471 With sample S2a-10 they drop back to insignificance only to return, similar to fungal remains, near  
472 the top of the seam with maximum values (18%). It is interesting that the marked change in  
473 periderm cells from PZ 2a to PZ 2b is accompanied by an equally marked increase of some  
474 tricolporate taxa, e.g. *Tricolpopollenites retiformis*, *T. liblarensis/microhenrici* and  
475 *Tricolporopollenites belgicus* (Fig 7A). Cuticle fragments are remnants of leaf cuticles which are  
476 easily drifted out to sea and washed onshore along shoreline drift [69,70]. Accordingly, they appear  
477 most frequently in PZ 1 and PZ 5.

478 Resin (resinite) and tannin-derived bodies (phlobaphinites) are the most common organic  
479 components second to charcoal. They represent cell fillings set free from decaying wood and are  
480 most abundant in PZ 2a and PZ 2b, but common to frequent throughout the whole seam with  
481 considerable fluctuation.

482 Charcoal particles become the dominant non-palynomorph element in PZ 3 and especially  
483 in PZ 4 in striking parallelism to the frequency of *Sphagnum*-type spores and the *Tripoporollenites*  
484 *robustus/rhenanus* group. The appearance of pollen of the Normapolles group and freshwater algae  
485 (*Zygnemataceae*) also coincides with the dominance of charcoal in PZ 4.

486  
487  
488  
489  
490  
491  
492  
493  
494  
495  
496  
497  
498  
499  
500  
501  
502  
503  
504  
505  
506  
507  
508

## Diversity (section S1)

In order to get estimates for palynological richness, rarefaction analyzes of 11 samples from Seam 1 were performed, distinguishing between point diversity within a single sample (Fig 12A, Table 1), alpha diversity within PZs 2 to 4 (Fig 12B, Table 2) and gamma diversity for the entire seam (Fig 12C, Table 2). Furthermore, analysis of beta diversity as well as evenness have been carried out (Tables 1, 2).

### **Fig 12. Palynological richness calculations for Seam 1 in section S1 using rarefaction analyses.**

(A) Point diversity: Individual rarefaction with conditional variance of 11 samples of Seam 1 using the algorithm of [71]. (B) Alpha diversity: Sample-based interpolation and extrapolation using the Bernoulli product model [56] for the 3 palynozones (PZ) of Seam 1 with 95% unconditional confidence intervals; Sobs, number of observed species. (C) Gamma diversity: Sample-based interpolation and extrapolation using the Bernoulli product model [56] for the entire data set of samples from Seam 1; Sobs, number of observed species. Because of differences in the number of counted individuals per sample, the sample-based rarefaction curves and their confidence intervals in (B) and (C) are replotted against an x-axis of individual abundance.

509 **Table 1: Estimations of palynological richness and evenness based on individual rarefaction**  
 510 **analysis for 11 lignite samples of section S1 (point diversity).**

|                                           | S1-1 | S1-2 | S1-3 | S1-4 | S1-5 | S1-6 | S1-7 | S1-8 | S1-9 | S1-10 | S1-11 |
|-------------------------------------------|------|------|------|------|------|------|------|------|------|-------|-------|
| Individuals counted                       | 416  | 346  | 343  | 502  | 305  | 316  | 304  | 316  | 310  | 329   | 328   |
| $S_{obs}$                                 | 74   | 88   | 63   | 59   | 30   | 41   | 48   | 45   | 50   | 51    | 72    |
| $S(est)_{300}$                            | 61.7 | 81.6 | 58.6 | 46.3 | 29.7 | 40.0 | 47.8 | 43.8 | 49.3 | 48.3  | 68.2  |
| $S(est)_{300}$ Std.err, $2\sigma$ , Lower | 56.1 | 77.3 | 54.9 | 40.8 | 28.7 | 38.1 | 46.8 | 41.7 | 47.7 | 45.3  | 64.7  |
| $S(est)_{300}$ Std.err, $2\sigma$ , Upper | 67.4 | 86.0 | 62.3 | 51.7 | 30.8 | 41.9 | 48.7 | 45.9 | 50.9 | 51.3  | 71.7  |
| Shannon-Wiener index                      | 3.24 | 3.70 | 3.13 | 2.84 | 2.19 | 2.76 | 3.13 | 2.72 | 3.02 | 2.37  | 3.19  |
| Evenness (E)                              | 0.79 | 0.84 | 0.77 | 0.74 | 0.65 | 0.75 | 0.81 | 0.72 | 0.78 | 0.61  | 0.76  |

511  $S_{obs}$ : Actual number of taxa within the samples;  $S(est)_{300}$ : Expected number of species for 300  
 512 counted palynomorphs using the algorithm of [71];  $S(est)_{300}$  Std.err,  $2\sigma$ : Lower and upper bounds  
 513 for a standard error of two-sigma of unconditional variance for 300 palynomorphs; evenness  
 514 calculation using the method of [58]:  $E = \text{Shannon-Wiener index} / \ln(S_{obs})$ .

515

516 **Table 2: Estimations of richness and evenness using sample-based incidence data for the 3**  
 517 **palynozones (PZ) of Seam 1 (alpha diversity) and for all samples of Seam 1 (gamma diversity).**

|                                | PZ 2  | PZ 3     | PZ 4  | Seam 1 |
|--------------------------------|-------|----------|-------|--------|
| Number of samples (n)          | 3     | 4        | 4     | 11     |
| $S_{obs}$                      | 126   | 99       | 110   | 179    |
| Individuals counted            | 1105  | 1427     | 1283  | 3815   |
| $S(est)_5$                     | 144   | 111      | 119   | 217*   |
| $S(est)_5$ 95% CI, Lower Bound | 131.2 | 96.5     | 107.9 | 196.0* |
| $S(est)_5$ 95% CI, Upper Bound | 154.7 | 124.6    | 130.5 | 238.3* |
| Singeltons                     | 49    | 40       | 41    | 58     |
| Doubletons                     | 21    | 13       | 21    | 20     |
| Shannon-Wiener index           | 3.89  | 3.09     | 3.12  | 3.69   |
| Evenness (E)                   | 0.80  | 0.67     | 0.66  | 0.71   |
| Beta diversity                 | 0.68  | 1.23     | 1.02  | 2.17   |
|                                |       | (0.74**) |       |        |

518  $S_{obs}$ : Actual number of taxa within the samples;  $S(est)_5$ : Expected number of species in 5 samples  
 519 using the Bernoulli product model [56];  $S(est)_5$  95% CI: Lower and upper bounds of 95%

520 confidence interval for  $S(\text{est})$ ;  $*S(\text{est})$  and  $*S(\text{est})$  95% CI in 20 samples; Singletons: Number of  
521 species that occur only once in all samples; Doubletons: Number of species that occur only twice  
522 in all samples; evenness calculation using the method of [58]:  $E = \text{Shannon-Winter index}/\ln(S_{\text{obs}})$ ;  
523 beta diversity using the measure of [59,64]:  $(S/\bar{a}) - 1$  ( $S$ , total number of species in the PZ or Seam  
524 1;  $\bar{a}$ , average number of species in the PZ or Seam 1; \*\* beta diversity estimation without sample  
525 S1-5).

526  
527 Comparing point diversity within the seam as based on individual rarefaction analyzes  
528 using the algorithm of [71], samples of PZ 2 (S1-1 to S1-3) together with sample S1-11 from the  
529 top of the seam provide the highest richness values (Fig 12A). While in samples S1-1, S1-3 and  
530 S1-11 between 59 and 68 species at 300 counted individuals can be expected, sample S1-2 shows  
531 by far the highest number with 82 species (Table 1). The richness in samples from the succeeding  
532 PZs 3 and 4 (samples S1-4 to S1-10) is significantly lower with values typically ranging from 40  
533 to 49 species among 300 counted palynomorphs (Table 1). In sample S1-5, which differs distinctly  
534 in composition of the microflora from the other samples of Seam 1 in the section (Fig 6C), even a  
535 much lower value with only 30 different species is achieved. Therefore, a decrease in palynological  
536 richness between PZ 2 and PZs 3 and 4 is obvious. Only at the top of the seam in sample S1-11 an  
537 increase of richness to values similar to those in PZ 2 is recognizable.

538 The same pattern of species richness is also evident in alpha diversity (Fig 12B). 126  
539 different pollen and spore taxa have been recorded in the three samples of PZ 2, while significantly  
540 lower numbers were observed in the subsequent PZ 3 with 99 species and in PZ 4 with 110 species,  
541 although the number of samples and of counted palynomorphs in these two PZs is higher than in  
542 PZ 2 (Table 2). Even if the 95% confidence intervals are considered, which describe the range of  
543 the possible number of species within the PZs, the richness in PZ 2 is significantly higher than in



544 the two subsequent PZs (Table 2). For PZ 3 and PZ 4 the 95% confidence intervals overlap  
545 somewhat (Fig 12B). A diversity increase from PZ 3 to PZ 4 is therefore indicated by the richness  
546 estimations, but it is not statistically significant. Furthermore, the interpolation/extrapolation graph  
547 of PZ 3 is not saturated indicating that the maximum number of species is higher than calculated  
548 and may possibly be in the same range or even higher than in PZ 4.

549 The high number of singletons and doubletons, showing the number of species with only  
550 one or two individuals within the data set, is striking (Table 2). For example, 70 of 126 species of  
551 pollen and spores in PZ 2 and 53 of 99 species in PZ 4 have only been recorded one or two times.  
552 Therefore, *c.* 55% of the species in the three PZs are singletons or doubletons indicating  
553 accordingly that more than half of the species within the total pollen assemblages belong to rare  
554 taxa.

555 The analysis of gamma diversity (Fig 12C) shows a high overall species richness for the  
556 entire section. 179 different species have been detected in Seam 1. An extrapolation to 20 samples  
557 even indicates a much higher number of morphologically distinct species (217, see Table 2). Since  
558 the interpolation/extrapolation graph is not saturated, even more species can be expected (Fig 12C).

559 Beta diversity as a measure of the difference in species composition is especially high in  
560 comparison between sample S1-5 and the other samples with values always higher than 0.6 (S5  
561 Table). This underlines the special composition of the palynomorph assemblage of sample S1-5 in  
562 comparison to the other lignite samples of section S1. In contrast, the values for beta diversity of  
563 sample comparisons within the same PZs are generally below 0.5 or between 0.5 and 0.6 if samples  
564 of different PZs are compared. This indicates minor changes in the composition of the palynomorph  
565 assemblages within the PZs, but changes in composition between PZs 2, 3, and 4. This is also  
566 confirmed by general beta diversity calculations for the PZs (Table 2). They are low with 0.68 for  
567 PZ 2 and 1.02 for PZ 4. Only in PZ 3 the value increases to 1.23, but this is again due to the specific

568 composition of the palynomorph assemblage in sample S1-5. If this sample is excluded from the  
569 analysis, the value drops to 0.74. In contrast, the total beta diversity value for Seam 1 is significantly  
570 higher with 2.17, indicating strong changes in the composition of the palynomorph assemblages  
571 between the individual PZs (Table 2).

572 In addition to species richness, the calculation of evenness provides another important  
573 parameter for diversity analysis. In single samples from Seam 1, usually evenness values of more  
574 than 0.7 are reached (Table 1). These high values show that the different palynomorph species  
575 within the microfloral assemblages are distributed relatively evenly in the individual samples in  
576 general. This indicates that (except for the high number of rare elements which contribute to the  
577 richness calculation) none of the abundant elements is clearly dominating. Only in samples S1-5  
578 and S1-10 the evenness values decrease to 0.64 and 0.61 showing that in these samples a dominance  
579 of some elements within the pollen assemblage becomes apparent.

580 PZ 3 and PZ 4 are characterized by relatively low evenness values of 0.67 and 0.66 (Table  
581 2). In contrast, the evenness for PZ 2 is significantly higher with 0.8. Together with the high value  
582 for species richness, the high evenness value therefore proves a morpho-diversity in samples of PZ  
583 2 that is significantly higher than in PZ 3 and PZ 4. The evenness value of 0.71 for the entire seam  
584 is in accordance to the values of the individual samples (Table 2).

585

## 586 **Discussion**

### 587 **Reconstruction of the paleoenvironment**

588 The NMDS of all three sections show a distinctive threefold succession of vegetation during  
589 formation of Seam 1 (Figs 5, 6, 7): an initial (PZ 2), a transitional (PZ 3) and a terminal stage (PZ

590 4). Such tripartite divisions appear to be common in coastal plain (paralic) coals and have been  
591 described and interpreted in terms of environment and vegetation first from the Carboniferous of  
592 Britain [72-74]. Mechanisms controlling facies and environment during transgression and  
593 regression in peat forming paralic domains have recently been reviewed by [75]. Seam 1 is  
594 sandwiched between Interbeds I (PZ 1) and II (PZ 5), both showing marine influence and being  
595 largely separated from the PZs 2 to 4 in the NMDS of the total data set (Fig 13). Thus in total the  
596 following four different types of paleoenvironment and vegetation can be distinguished in the three  
597 sections: (1) a near coastal vegetation (PZ 1 and PZ 5), (2) a lowland mire (PZ 2), (3) a transitional  
598 mire (PZ 3) and (4) a terminal mire (PZ 4). They are unaffected by the onset of a warming event  
599 close to the top of the seam [13] and may therefore be considered as representing plant associations  
600 typical for individual types of vegetation during the Early Eocene climatic background.

601

602 **Fig 13. Non-metric multidimensional scaling (NMDS) scatter plots of 56 samples from**  
603 **sections N, S1 and S2. (A) Arrangement of samples (B) Arrangement of palynomorph taxa. For**  
604 **calculation the Bray-Curtis dissimilarity and Wisconsin double standardized raw-data values have**  
605 **been used.**

606

### 607 **Near-coastal vegetation (PZ 1, PZ 5)**

608 Sandwiched between two marine-influenced interbeds Seam 1 was deposited between a regressive  
609 phase represented by PZ 1 (top of Interbed 1) and a transgressive phase represented by PZ 5 (base  
610 of Interbed 2). The NMDS of the total data set (Fig 13A) shows that samples of PZ 1 and PZ 5 are  
611 largely separated from most of the samples of Seam 1 in the ordination space but plot together with

612 some samples of PZ 2. This indicates that both marine influenced PZs include elements of the peat-  
613 forming lowland mire vegetation in the background.

614 The dominance of *Inaperturopollenites* spp. in PZ 1 and PZ 5 shows that Cupressaceae s.l.  
615 played an important role in the coastal vegetation. Together with *Nyssapollenites*, fairly common  
616 in the succeeding PZ 2, they indicate that a *Nyssa/Taxodium* swamp forest existed adjacent to the  
617 coast at Schöningen (Figs 13B, 14). Such a swamp community was originally reconstructed for the  
618 Miocene Lower Rhine Lignite but the model has later been extended to examples from other areas  
619 and Cenozoic ages [76,77]. Associated elements are *Plicatopollis* spp., *Tricolporopollenites*  
620 *liblarensis* and *Plicapollis pseudoexcelsus*. The latter has been interpreted as a back-mangrove  
621 element associated with marsh elements in the Middle Eocene Helmstedt Formation [10,78,79].  
622 The anemophilous *Plicatopollis* spp. and *T. liblarensis* as well as the very thin-walled  
623 *Inaperturopollenites* spp. are also likely to be derived from nearby external sources such as the  
624 background mire forest (Fig 14 A).

625

626 **Fig 14. Paleoenvironment reconstruction for Seam 1.** Four different types of paleoenvironment  
627 and vegetation can be distinguished in the three sections N, S1 and S2: (A) a near coastal vegetation  
628 (PZ 1 and PZ 5) (B) a lowland mire (PZ 2) (C) a transitional mire (PZ 3) (D) a terminal mire (PZ  
629 4).

630

631 Except for scattered occurrences of putative *Rhizophora* (Fig 14A) true mangrove pollen  
632 characterizing the coastal vegetation of the middle Eocene Helmstedt Formation, such as *Avicennia*  
633 and *Nypa* [10-12,78], is completely missing in the Schöningen Formation [11,13]. Instead,  
634 *Pistillipollenites mcgregorii* and *Thomsonipollis magnificus* (both of unknown botanical affinity)  
635 may have substituted there for mangrove elements [11]. Since *T. magnificus* occurs regularly in PZ

636 1 and 5 in sections S1 and S2 and is very abundant in PZ 2a in section N, where *P. mcgregorii* also  
637 occurs at least in low numbers, the parent plants of both taxa were probably common in the  
638 immediate coastal vegetation during the deposition of the lower part of the Schöningen Formation.

639 Finally, cuticle fragments which are abundant in both, PZ 1 and PZ 5, may have had their  
640 source in the near-coastal vegetation and were concentrated along the shoreline by winnowing  
641 [69,70].

## 642 **Lowland mire (PZ 2)**

643 At the onset of Seam 1 palynomorph assemblages combined in PZ 2 indicate a trend in the  
644 vegetation that started in PZ 1 and pass into PZ 3. As shown by the NMDS samples of PZ 2 are  
645 plotted together on the negative side of axis 1 in the ordination space (Fig 13A). However, there is  
646 only little separation from the samples of PZ 1 and PZ 5 and an overlap with samples from the  
647 following PZ 3.

648 The abundance of *Inaperturopollenites* spp. (Cupressaceae s.l.) and the common  
649 occurrence of *Nyssapollenites* spp. (Nyssaceae) on either side of the interbed/seam boundary  
650 support the existence of a *Nyssa/Taxodium* swamp forest in the immediate vicinity of the coastline.  
651 This swamp forest may have been locally replaced by or mixed with patches of other elements,  
652 such as the mother plant of *Plicapollis pseudoexcelsus* (base of PZ 2 in section N and S1, Figs 5,  
653 6), a characteristic element of transitional marine/terrestrial environments of possible  
654 juglandaceous affinity [10,78,79]. *Thomsonipollenites magnificus* is quite abundant in section N  
655 (PZ 2a) in contrast to the other two sections.

656 In particular, *Alnipollenites verus* (*Alnus*) is common to frequent throughout PZ 2 and even  
657 highly dominant in some samples of section N (e.g., N4, Fig 5) and S2 (e.g., S2-a2, Fig 7). For  
658 these sites freshwater wetland habitats may be envisioned similar to those in which modern species  
659 of *Alnus* such as e.g. *A. glutinosa* [80], *A. incana* [81] or *A. viridis* [82] grow today. Intermittent

660 open fern meadows are indicated by the strong proliferation of trilete spores at the base of PZ 2 in  
661 section N. Notably, these spores are absent in the other two sections. Other common associates of  
662 PZ 2 assemblages such as *Monocolpopollenites tranquillus* (Arecaceae, *Phoenix*), *Plicatopollis*  
663 spp., and *Tricolpopollenites liblarensis* may have been in part indigenous to PZ 2, but they are  
664 small and thin-walled, therefore considered to be anemophilous [24] and likely to be introduced  
665 from other sources.

666 Local differences shown in the three sections are a special feature of PZ 2 indicating a  
667 pronounced patchiness in the lowland vegetation (Fig 14B). These variations in species  
668 composition and dominance at the initiation of Seam 1 are associated with local changes in water  
669 tables and nutrient levels as well as exposure to the sea (salinity) as shown by successional changes  
670 in modern taxodiaceous and tropical angiosperm swamp forests [83-86].

671 This is also reflected in the striking contrast between subzones PZ 2a and PZ 2b in sections  
672 N and S2. Notable is, for instance, the replacement of fern spores (*Leiotriletes* spp.) in section S2  
673 by pollen of woody plants such as *Tricolporopollenites belgicus* (Fig 7). The apparent change from  
674 a herbaceous vegetation rich in ferns in PZ 2a to a more woody vegetation in PZ 2b is even reflected  
675 in the distribution of non-palynomorph organic remains showing an increase of periderm cells,  
676 phlobaphinites and resin particles as well as fungal remains from PZ 2a to PZ 2b (Fig 11).

### 677 **Transitional mire (PZ 3)**

678 The change in vegetation occurring within PZ 3 is gradual. Previously dominant elements such as  
679 *Alnus* (*Alnipollenites verus*) or the Cupressaceae s.l. (*Inaperturopollenites* spp.) are replaced by  
680 taxa such as *Pompeckjoidaepollenites subhercynicus*, pollen of the *Triporopollenites*  
681 *robustus/rhenanus* group as well as *Sphagnum*-type spores the latter two of which become  
682 eventually dominant in the succeeding PZ 4.

683           Accordingly, the samples of PZ 3 plot midway between those of the clearly separated PZ 2  
684 and PZ 4 in the ordination space of the NMDS of the total data set (Fig 13A). There are, however,  
685 considerable areas of overlap with both PZs which characterizes PZ 3 as transitional between the  
686 initial and the terminal phases in the formation of Seam 1. The PZ 3 samples of section S2 differ  
687 from those of the other two sections since they plot separate to the left on the negative side of axis  
688 1 (Fig 13A). This is due to the fact that the similarity of samples from S2 to those of PZ 2 is closer  
689 than in the other two sections, which are more transitional to PZ 4.

690           *P. subhercynicus* (unknown botanical affinity) and the *T. robustus/rhenanus* group pollen  
691 (Myricaceae) are widely distributed throughout the Schöningen Formation and often dominant in  
692 the upper part of the lower seams (Main Seam, Seam 1 and Seam 2 [13]). *P. subhercynicus* is more  
693 restricted to certain levels and appears to prefer mire forest/marsh interfaces (ecotones) [10,12].  
694 The *T. robustus/rhenanus* group is locally abundant in PZ 3 and even dominant in section N before  
695 becoming dominant throughout PZ 4. Noteworthy is the first strong appearance of *Sphagnum*-type  
696 spores indicating an initial tendency for ombrogenous bogs to develop under an open canopy of an  
697 angiosperm mire forest (Fig 14C).

698           Sample 5 of section S1 is clearly separated from all other samples in the NMDS (Fig 6C,  
699 Fig 13) due to the dominance of peat moss and fern spores (*Sphagnum*-type spores,  
700 *Laevigatosporites* spp., *Leiotriletes* spp.) coinciding with a mass occurrence of charcoal particles.  
701 The sample was taken from a tree stump layer (X-Horizon) suggesting that a tree throw or fire may  
702 have left a clearing allowing ferns and mosses to settle as pioneering elements.

703

#### 704 **Terminal mire vegetation (PZ 4)**

705 A very marked change in palynomorph assemblage composition occurs at the transition from PZ 3  
706 to PZ 4. This is mainly due to the rise to dominance of *Sphagnum*-type spores including all three

707 genera previously observed in seams of the Schöningen Formation, i.e. *Sphagnumsporites*,  
708 *Tripunctisporis* and *Distancorisporis* [27,68]. Although the latter two are morphologically  
709 different from modern *Sphagnum* spores the three genera are sufficiently similar and closely  
710 associated with remains of *Sphagnum* leaves in a thin lignite seam (*Sphagnum* Seam) higher up in  
711 the Schöningen section to confirm their affinity to *Sphagnum* [11,27,68].

712 The change in PZ 4 is underscored by the great increase in pollen of the *T.*  
713 *robustus/rhenanus* group. Although some of these changes are already initiated in section N (for  
714 *T. robustus/rhenanus*) and section S1 (for *Sphagnum*-type spores), the NMDS of all three sections  
715 (Figs 5C, 6C, 7C) and of the total data set (Fig 13A) show a clear separation of PZ 4 samples from  
716 those of all other PZs.

717 According to SEM studies of the authors (VW and WR, unpublished) *T. robustus* should  
718 be considered as derived from Myricaceae, a family today represented by small trees and shrubs  
719 adapted to wet acidic environments and nutrient deficiency [87,88]. Together with *Sphagnum* they  
720 clearly signal that peatbeds in PZ 4 were decoupled from groundwater and their hydrology  
721 increasingly controlled by precipitation [89-91] (Fig 14D). The increase of *Ericipites* sp. (Ericaceae)  
722 and *Milfordia* spp. (Restionaceae) in section S1 is fully in line with this development. In particular,  
723 Restionaceae have been described as an important constituent of the so-called *Sphagnum* Seam at  
724 Schöningen which has been compared with a southern hemisphere restionad bog [27]. At least  
725 temporarily standing water is indicated by the rare but regular occurrence of remains of freshwater  
726 algae such as spores of Zygnemataceae (Fig 14D).

727 Somewhat intriguing are certain members of the Normapolles such as *Basopollis* and  
728 *Nudopollis*, relics from the Cretaceous, the occurrence of which is one of the last in the Paleogene  
729 of Central Europe and largely restricted here to PZ 4. Their parent plants seem to have found refuge  
730 within the vegetation and environment of PZ 4 just prior to their extinction. However, the



731 association of *B. orthobasalis* with pollen of plants that are adapted to nitrogen and phosphorus  
732 deficient substrates such as Myricaceae in the Paleocene show that they also favored nutrient poor  
733 substrates [94].

734 The multiple evidence of waterlogged conditions and standing water, however, seems  
735 counterintuitive to the massive occurrence of charcoal particles (Fig 11) some of which show  
736 pitting and are, therefore, wood derived. This apparent contradiction may be resolved in three ways:  
737 by close lateral proximity of burnt and waterlogged to aquatic sites, by crown fires in a temporarily  
738 flooded mire forest or by periodic drought followed by flooding and resettlement of burned forest  
739 sites. A possible modern equivalent for the latter may be provided by the complex fire regime in  
740 the Okefenokee Swamp (Georgia, USA) [95], where periodic forest fires at approximately 25 year  
741 intervals left charcoal horizons, but also maintained open areas, the so-called wet prairies which  
742 include peat mosses [96,97]. New peat was deposited after each fire [98]. In PZ 4 of Seam 1 new  
743 peat was formed among others by regrowth of *Sphagnum*, ferns, Restionaceae (section S1), and  
744 shrubs (Myricaceae, Betulaceae, Juglandaceae).

745

## 746 **Diversity**

747 The study of the morpho-diversity of the pollen assemblages in section S1 allows for an estimate  
748 of the diversity of the vegetation, assuming that the pollen rain reflects relative changes within the  
749 vegetation [58,61]. 179 palynomorph species have been recognized in Seam 1, but gamma diversity  
750 calculation shows that more than 200 species can be expected (Fig 12C, Table 2). Thus, the  
751 diversity is distinctly higher than calculated for other Lower Eocene records, especially those in  
752 North America (Mississippi, Alabama) [99,100]. However, the calculations may be based on  
753 different taxonomic resolution and should be considered with caution. In any case, the diversity

754 measures of Seam 1 reflect a high plant diversity as typical for forested tropical coastal wet- and  
755 peatlands [101].

756 The high morpho-diversity of the microflora in PZ 2 is striking. The point diversity of  
757 samples S-1, S-2, and S-3 of section S1 and the alpha diversity are significantly higher than in the  
758 other samples or PZs in S1 (Figs 12A, B). This may be related to the fact that PZ 2 represents a  
759 mixture of elements from the coastal vegetation and the subsequent lowland mire forest. However,  
760 a lowland mire forest, as represented in PZ 2 is in any case highly diverse compared to a disturbed  
761 terminal mire vegetation with raised bog that follows later [101].

762 With the initiation of a *Sphagnum* bog a peat swamp developed that became increasingly  
763 oligotrophic supporting plant communities that are adapted to low pH and nutrient depletion and  
764 low in diversity [102]. Accordingly, the samples of PZ 3 as well as the samples of the lower part  
765 of PZ 4 are characterized by the lowest point diversity (Fig 12A). Alpha diversity of PZ 3 is also  
766 significantly lower than in PZ 2 (Fig 12B).

767 In the uppermost sample of PZ 3 the point diversity clearly increases again (Fig 12A) since  
768 immediately prior to the transgression of Interbed 2 species-rich back swamp and coastal  
769 communities returned to the site. Sample S1-5 (X-horizon) clearly differs from all other samples  
770 of Seam 1 because point diversity and evenness are by far the lowest due to the dominance of  
771 spores and the concomitant decline of other elements (Fig 12A, Table 1). Possibly, a temporary  
772 clearing in the mire forest may have been settled there by ferns and mosses as pioneer elements.

773

## 774 **Paleoclimate**

775 Isotope analyses have recently shown that a Carbon isotope excursion (CIE) indicates a short-term  
776 thermal event that started at the topmost sample of Seam 1 extending into the lower part of Seam  
777 2 [13]. Nevertheless, the bulk of Seam 1 was deposited during a moderately warm period of the

778 Lower Eocene as suggested below. However, temperature reconstructions for Seam 1 based on  
779 biomarker analysis (brGDGTs) resulted in high mean annual temperatures (MAT), which reached  
780  $24^{\circ}\text{C} \pm 4.6^{\circ}\text{C}$  in the lower part of the seam [103]. Therefore, a thermophilic vegetation should be  
781 expected similar to other sites along the southern coast of the Proto-North Sea such as Cobham  
782 (southern England) and Vasterival (France) which included the PETM [104,105].

783 We present evidence here that the vegetation of Seam 1 indicates a cooler mesothermal  
784 climate. True humid tropical mangrove elements such as *Avicennia* and *Nypa*, common in the  
785 coastal vegetation of the succeeding Middle Eocene Helmstedt Formation [10,78], are absent. This  
786 suggests at least extratropical conditions for the Schöningen Formation [11]. On the other hand,  
787 *Alnus*, one of the characteristic elements of PZ 2 does not occur in the PETM records of the Cobham  
788 lignite and Vasterival [104,105]. The assemblages of PZ 2 are more compatible with high-latitude  
789 Eocene swamp forests such as those on Axel Heidberg Island in the Canadian High Arctic, where  
790 Cupressaceae s.l. and *Alnus* are widely distributed [106]. A similar microflora is also known from  
791 the Paleocene/Eocene boundary in the central North Sea [107], where the vegetation is composed  
792 of mesothermal conifers (Cupressaceae s.l.) and dicots such as *Alnus*, *Carya* and *Juglans* indicating  
793 a mixed conifer broadleaf vegetation [107]. Temperature reconstructions for this record based on  
794 comparisons with nearest living relatives (NLR) indicate relatively cool mean annual temperatures  
795 (MAT) of  $15^{\circ}\text{C}$  and cold month mean temperatures (CMMT) of  $8^{\circ}\text{C}$  but warm month mean  
796 temperatures (WMMT) of  $22.5^{\circ}\text{C}$  for the North Sea region [107]. The similarly composed  
797 palynomorph assemblages of PZ 2, in particular the high abundance of *Alnus* pollen, would,  
798 therefore, suggest similar extratropical conditions for Seam 1. This is a considerably cooler  
799 estimate than that based on biomarker analysis notwithstanding the resemblance of WMMT  
800 estimates. However, this may be explained by the fact that a certain temperature bias between  
801 brGDGTs estimates and those from leaves and palynomorphs is well known [107,108].

802           Although *Alnus* as a temperate climate element declines in PZ 2 and PZ 3 extratropical  
803 conditions seem to have persisted through PZ 3 and PZ 4 since *Sphagnum* and fern spores in  
804 association with pollen of Restionaceae and Ericaceae dominate [11,27]. They are typical for  
805 temperate mires in the southern hemisphere today. In the northern hemisphere similar pollen  
806 assemblages are also known from Paleocene to Lower Eocene coals of Texas and Wyoming [109].

807           The close association of *Sphagnum* and fern spores with high abundances of charcoal in PZ  
808 3 and PZ 4 (Fig 11) appears rather contradictory and has been interpreted in a number of ways also  
809 with regard to climate. In any case, the great increase in charcoal points to an increase in fire activity  
810 and possibly to dryer conditions in the area toward the end of Seam 1 formation. [68] argued that  
811 wildfires impeded the spread of taller and more vulnerable vascular plants and thereby advanced  
812 the spread of *Sphagnum*. On the other hand, the highest abundance of charcoal at the top of PZ 4  
813 (Fig 11) may be correlated with the onset of a CIE [13] considering that an increase of wildfires  
814 shortly before the onset of the PETM has been noted for the Cobham lignite [104,110]. This could  
815 give support to the suggestion that peat burning may have been a trigger for CIEs and associated  
816 thermal events in the early Paleogene [111,112]. However, we favor the Okefenokee Swamp  
817 (Georgia, USA) as a recent example for conditions existing during PZ 4, in which periodic droughts  
818 and subsequent forest fires under a warm-temperate climate leave open areas later invaded by a  
819 herbaceous vegetation consisting of *Sphagnum*, ferns, Restionaceae and Ericaceae with aquatic  
820 sites in between.

## 821 **Conclusions**

822 Statistical scrutiny by means of Cluster analyses and NMDS shows that 5 different PZs occurring  
823 in vertical succession can be clearly distinguished in the three sections of Seam 1 despite local  
824 differences between them. They reflect vegetation responses to changes in environment and facies

825 that take place during an early Paleogene regression/transgression cycle including the formation of  
826 a coal seam. The two PZs bounding the seam, PZ 1 and PZ 5, are similar mainly due to the presence  
827 of marine indicators (*Apectodinium*, *Rhizophora*) and reflect the state of vegetation during the  
828 regressional respectively transgressional phase. PZ 2 to PZ 4 represent changes occurring during  
829 seam formation. The initial phase (PZ 2) is characterized by a patchy, pioneering vegetation (e.g.  
830 *Thomsonipollis magnificus*, *Alnipollenites verus*) controlled by variable edaphic conditions. PZ 3  
831 appears transitional in a seam of limited thickness, but represents a certain climax in mire  
832 development since it is composed of a mix of species adapted to these conditions. External factors  
833 increasingly lead to disturbances of the environment and extreme conditions for peat development  
834 supporting a rather heterogeneous vegetation of *Sphagnum*, ferns, and Myricaceae in combination  
835 with frequent charcoal (PZ 4) during the terminal phase.

836         Diversity measurements show that PZ 2 has the greatest species diversity as is commonly  
837 the case in ecotones containing elements from adjacent communities as well as specialists of  
838 different habitats. Since they disappear with progressive stabilization of the mire environment,  
839 diversity drops to the lowest in PZ 3, before disturbances of the environment create new habitats  
840 in PZ 4. This pattern may be considered typical of vegetation responses in regression/transgression  
841 cycles.

842         Climatic signals for Seam 1 are somewhat contradictory. Warm temperatures of ca. 24 °C  
843 have been calculated by biomarker analyses of Seam 1 approaching those accepted for the PETM  
844 [103]. Isotope analyses [13], on the other hand, have shown that Seam 1 has been formed just prior  
845 to a negative CIE excursion. There is strong palynological evidence from Seam 1 that a temperate  
846 climate prevailed in northwestern Germany during the lowermost lower Eocene, since *Alnus* and  
847 *Sphagnum* are abundant temperate elements in Seam 1, while tropical elements, e.g. *Avicennia*,  
848 *Nypa* and *Sapotaceae*, well known from the Middle Eocene Helmstedt Formation, are entirely

849 missing. Seam 1, therefore, stands as an example typical for the climate during the Early Eocene  
850 apart from any thermal event. Thus, a complete isotope record and critical taxonomic inventory of  
851 the palynology appears prerequisite to characterize any of the Early Eocene thermal events that  
852 may occur above or below Seam 1.

853

## 854 **Acknowledgements and funding**

855 Olaf Lenz acknowledges support through a grant of the Deutsche Forschungsgemeinschaft (DFG  
856 LE 2376/4-1). We thank Karin Schmidt for valuable field support and technical assistance. We are  
857 also grateful to the MIBRAG (formerly BKB and later EoN) for access to the sections and technical  
858 support in the field. We thank ## referees for their reviews and comments that helped to  
859 significantly improve this paper.

860

## 861 **References**

- 862 1. Zachos JC, Pagani M, Sloan L, Thomas E, Billups K. Trends, rhythms, and aberrations in global  
863 climate 65 Ma to present. *Science*. 2001; 292: 686 – 693.
- 864 2. Kennet JP, Stott LD. Abrupt deep-sea warming, palaeoceanographic changes and benthic  
865 extinctions at the end of the Palaeocene. *Nature*. 1991; 353: 225–229.
- 866 3. Bains S, Norris RD, Corfield RM, Faul KL. Termination of global warmth at the  
867 Palaeocene/Eocene boundary through productivity feedback. *Nature*. 2000; 407: 171–174.
- 868 4. Röhl U, Bralower TJ, Norris RD, Wefer G. New chronology for the late Paleocene thermal  
869 maximum and its environmental implications. *Geology*. 2000; 28: 927–930.

- 870 5. Röhl U, Westerhold T, Bralower TJ, Zachos JC. On the duration of the Paleocene-Eocene  
871 thermal maximum (PETM). *Geochemistry, Geophysics, Geosystems*. 2007; 8: Q12002.  
872 doi:10.1029/2007GC001784, 2007.
- 873 6. Lourens LJ, Sluijs A, Kroon D, Zachos JC, Thomas E, et al. Astronomical pacing of late  
874 Palaeocene to early Eocene global warming events. *Nature*. 2005; 235: 1083–1087.
- 875 7. Sluijs A, Schouten S, Donders T., Schoon PL, Röhl U, Reichart GJ, et al. Warm and wet  
876 conditions in the Arctic region during Eocene Thermal Maximum 2. *Nature Geosciences*. 2009;  
877 2: 777–780.
- 878 8. Cramer BS, Wright JD, Kent DV, Aubry MP. Orbital climate forcing of  $\delta^{13}\text{C}$  excursions in the  
879 late Paleocene–early Eocene (chrons C24n-C25n). *Paleoceanography*. 2003; 18: 1097. doi:  
880 10.1029/2003PA000909.
- 881 9. Röhl U, Westerhold T, Monechi S, Thomas E, Zachos JC, Donner B. The Third and Final Early  
882 Eocene Thermal Maximum: Characteristics, Timing and Mechanisms of the “X” Event.  
883 *Geological Society of America, Abstracts with Programs*. 2005; 37: 264.
- 884 10. Lenz OK. Palynologie und Paläoökologie eines Küstenmoores aus dem Mittleren Eozän  
885 Mitteleuropas-Die Wulfersdorfer Flözgruppe aus dem Tagebau Helmstedt, Niedersachsen,  
886 *Palaeontographica B*. 2005; 271: 1-157.
- 887 11. Riegel W, Wilde V, Lenz OK. The Early Eocene of Schöningen (N-Germany) – an interim  
888 report. *Austrian Journal of Earth Sciences*. 2012; 105: 88–109.
- 889 12. Riegel W, Lenz OK, Wilde V. From open estuary to meandering river in a greenhouse  
890 world – An ecological case study from the Middle Eocene of Helmstedt, northern Germany.  
891 *Palaios*. 2015; 30: 304-326.

- 892 13. Methner K, Lenz OK, Riegel W, Wilde V, Mulch A. Paleoenvironmental response of  
893 midlatitudinal wetlands to Paleocene–early Eocene climate change (Schöningen lignite deposits,  
894 Germany). *Climate of the Past*. 2019; 15: 1741-1755.
- 895 14. Brandes C, Pollok L, Schmidt C, Wilde V, Winsemann J. Basin modelling of a lignite-  
896 bearing salt rim syncline: insights into rim syncline evolution and salt diapirism in NW Germany.  
897 *Basin Research*. 2012; 24: doi: 10.1111/j.1365-2117.2012.00544x.
- 898 15. Blumenstengel H, Krutzsch, W. Tertiär. In: Bachmann GH, Ehling BC, Eichner R, Schwab  
899 M, editors. *Geologie von Sachsen-Anhalt*. Schweizerbart, Stuttgart; 2008. pp. 267-273.
- 900 16. Standke G. Paläogeografie des älteren Tertiärs (Paleozän bis Untermiozän) im  
901 mitteleutschen Raum. *Zeitschrift der Deutschen Gesellschaft für Geowissenschaften*. 2008,  
902 159: 81-103.
- 903 17. Wilde V, Riegel W, Lenz OK. Das Paläogen im Helmstedter Revier: Ein Forschungsthema  
904 im Geopark Harz. Braunschweiger Land. Ostfalen. *Gaussiana*. 2020; 1: Forthcoming.
- 905 18. Manger G. Der Zusammenhang von Salztektunik und Braunkohlenbildung bei der  
906 Entstehung der Helmstedter Braunkohlenlagerstätten. *Mitteilungen aus dem Geologischen  
907 Staatsinstitut in Hamburg*. 1952; 21: 7-45.
- 908 19. Gramann F, Harre W, Kreuzer H, Look ER, Mattiat B. K-Ar ages of Eocene to Oligocene  
909 glauconitic sands from Helmstedt and Lehrte (Northwestern Germany). *Newsletter on  
910 Stratigraphy*. 1975; 4: 71-86.
- 911 20. Gürs K. Das Tertiär Nordwestdeutschlands in der Stratigraphischen Tabelle von  
912 Deutschland 2002. *Newsletters on Stratigraphy*. 2005; 41: 313-322.
- 913 21. Ahrendt H, Köthe A, Lietzow A, Marheine D, Ritzkowski S. Lithostratigraphie,  
914 Biostratigraphie und radiometrische Datierung des Unter-Eozäns von Helmstedt (SE-  
915 Niedersachsen). *Zeitschrift der Deutschen Geologischen Gesellschaft*. 1995; 146: 450-457.



- 916 22. Köthe A. Dinozysten-Zonierung im Tertiär Norddeutschlands. *Revue de Paléobiologie*.  
917 2003; 22: 895-923.
- 918 23. Pflug HD. Palynologie und Stratigraphie der eozänen Braunkohlen von Helmstedt.  
919 *Paläontologische Zeitschrift*. 1952; 26: 112-137.
- 920 24. Pflug HD. Palyno-Stratigraphie des Eozän/Oligozän im Raum von Helmstedt, in  
921 Nordhessen und im südlichen Anschlussbereich. In: Tobien H, editor. *Nordwestdeutschland im*  
922 *Tertiär. Beiträge zur Regionalen Geologie der Erde*, Gebrüder Borntraeger, Berlin, Stuttgart.  
923 1986; 18: pp. 567-582.
- 924 25. Laskar J, Fienga A, Gastineau M, Manche H. La2010. A new orbital solution for the long  
925 term motion of the Earth. *Astronomy & Astrophysics*. 2011; 532, A89: 1-15.
- 926 26. Haq BU, Hardenbol J, Vail PR. Mesozoic and Cenozoic chronostratigraphy and cycles of  
927 sea-level change. In: Wilgus CK, Hastings BS, Kendall, CGSG, Posamentier HW, Ross CA,  
928 Van Wagoner JC, editors. *Sea-level changes: an integrated approach*. SEPM Special Publication.  
929 1988; 42: pp. 71-108.
- 930 27. Riegel W, Wilde V. An early Eocene Sphagnum bog at Schöningen, northern Germany.  
931 *International Journal of Coal Geology*. 2016; 159: 57-70.
- 932 28. Bujak JP, Brinkhuis H. Global warming and dinocyst changes across the Paleocene/Eocene  
933 Epoch boundary. In: Aubry MP, Lucas SG, Berggren W, editors. *Late Paleocene – early Eocene*  
934 *climatic and biotic events in the marine and terrestrial records*; 1998. pp. 277-295.
- 935 29. Crouch EM, Heilmann-Clausen C, Brinkhuis H, Morgans HE, Rogers KM, Egger H,  
936 Schmitz B. Global dinoflagellate event associated with the late Paleocene thermal maximum.  
937 *Geology*. 2001; 29: 315-318.

- 938 30. Heilmann-Clausen C, Nielsen OB, Gersner F. Lithostratigraphy and depositional  
939 environments in the Upper Paleocene and Eocene of Denmark, Bulletin of the Geological  
940 Society of Denmark. 1985; 33: 287-323.
- 941 31. Iakovleva AI, Brinkhuis H, Cavagnetto C. Late Palaeocene–Early Eocene dinoflagellate  
942 cysts from the Turgay Strait, Kazakhstan; correlations across ancient seaways, Palaeogeography,  
943 Palaeoclimatology, Palaeoecology. 2001; 172: 243-268.
- 944 32. Sluijs A, Brinkhuis, H. A dynamic climate and ecosystem state during the Paleocene-  
945 Eocene Thermal Maximum: inferences from dinoflagellate cyst assemblages on the New Jersey  
946 Shelf. Biogeosciences. 2009; 6: 1755-1781.
- 947 33. Sluijs A, Schouten S, Pagani M, Woltering M, Brinkhuis H, Damsté JSS, et al. Subtropical  
948 Arctic Ocean temperatures during the Palaeocene/Eocene thermal maximum. Nature. 2006; 441:  
949 610-613.
- 950 34. Sluijs A, Brinkhuis H, Schouten S, Bohaty SM, John CM, Zachos JC, et al. Environmental  
951 precursors to rapid light carbon injection at the Palaeocene/Eocene boundary. Nature. 2007; 450:  
952 1218-1221.
- 953 35. Williams GL, Damassa SP, Fensome RA, Guerstein GR. Wetzeliella and Its Allies — The  
954 ‘Hole’ Story: A Taxonomic Revision of the Paleogene Dinoflagellate Subfamily  
955 Wetzelielloideae. Palynology. 2015; 39: 289-344.
- 956 36. Heilmann-Clausen C. Observations of the dinoflagellate Wetzeliella in Sparnacian facies  
957 (Eocene) near Epernay, France, and a note on tricky acmes of Apectodinium. Proceedings of  
958 the Geologists’ Association. 2018. <https://doi.org/10.1016/j.pgeola.2018.06.001>
- 959 37. Kaiser ML, Ashraf R. Gewinnung und Präparation fossiler Pollen und Sporen sowie anderer  
960 Palynomorphae unter besonderer Berücksichtigung der Siebmethode. Geologisches Jahrbuch.  
961 1974; 25, 85–114.

- 962 38. Thomson PW, Pflug H. Pollen und Sporen des mitteleuropäischen Tertiärs.  
963 Gesamtübersicht über die stratigraphisch und paläontologisch wichtigen Formen.  
964 *Palaeontographica B.* 1953; 94: 1–138.
- 965 39. Krutzsch W, Vanhoorne R. Die Pollenflora von Epinois und Loksbergen in Belgien.  
966 *Palaeontographica B.* 1977; 163: 1-110.
- 967 40. Thiele-Pfeiffer H. Die Mikroflora aus dem mitteleozänen Ölschiefer von Messel bei  
968 Darmstadt. *Palaeontographica B.* 1988; 211: 1–86.
- 969 41. Nickel B. Die mitteleozäne Mikroflora von Eckfeld bei Manderscheid/Eifel. *Mainzer*  
970 *Naturwissenschaftliches Archiv. Beiheft.* 1996; 18: 1–121.
- 971 42. Lenz OK, Wilde V. Changes in Eocene plant diversity and composition of vegetation: the  
972 lacustrine archive of Messel (Germany). *Paleobiology.* 2018; 44: 709-735.
- 973 43. Moshayedi M, Lenz OK, Wilde V, Hinderer M. The recolonization of volcanically  
974 disturbed Eocene habitats of Central Europe: The maar lakes of Messel and Offenthal (SW  
975 Germany) compared. *Palaeobiodiversity and Palaeoenvironments.* 2020 (in press)
- 976 44. Bray JR, Curtis JT. An ordination of the upland forest communities of southern Wisconsin.  
977 *Ecological Monographs.* 1957; 27: 325-349.
- 978 45. Cottam G, Goff FG, Whittaker RH. Wisconsin Comparative Ordination. In: Whittaker RH,  
979 editor. *Ordination of Plant Communities. Handbook of Vegetation Science.* 1978; 5-2: 185-213.
- 980 46. Gauch HG, Scruggs WM. Variants of polar ordination. *Vegetatio.* 1979; 40: 147-153.
- 981 47. Oksanen J. Standardization methods for community ecology. Documentation and user  
982 guide for package *Vegan*, 1.8-6; 2007.
- 983 48. Mander L, Kürschner WM, McElwain JC. An explanation for conflicting records of  
984 Triassic–Jurassic plant diversity. *Proceedings of the National Academy of Sciences of the*  
985 *United States of America.* 2010; 107: 15351–15356.

- 986 49. Hammer Ø, Harper DAT, Ryan PD. PAST: paleontological statistics software package for  
987 education and data analysis. *Palaeontologia Electronica*. 2001; 4. Available from:  
988 [http://www.palaeo-electronica.org/2001\\_1/past/issue1\\_01.htm](http://www.palaeo-electronica.org/2001_1/past/issue1_01.htm).
- 989 50. Hair JF, Black WC, Babin BJ, Anderson RE. *Multivariate Data Analysis*. Seventh Edition.  
990 Prentice Hall, Upper Saddle River, New Jersey; 2010.
- 991 51. Minchin PR. An evaluation of the relative robustness of techniques for ecological  
992 ordination. *Vegetatio*. 1987; 69: 89–107.
- 993 52. Jardine PE, Harrington GJ. The Red Hills Mine palynoflora: A diverse swamp assemblage  
994 from the Late Paleocene of Mississippi, USA. *Palynology*. 2008; 32: 183-204.
- 995 53. Ghilardi B, O'Connell M. Fine resolution pollen analytical study of Holocene woodland  
996 dynamics and land use in north Sligo, Ireland. *Boreas*. 2013; 42: 623-649.
- 997 54. Broothaerts N, Verstraeten G, Kasse C, Bohncke S, Notebaert B, Vandenberghe J.  
998 Reconstruction and semi-quantification of human impact in the Dijle catchment, central  
999 Belgium: a palynological and statistical approach. *Quaternary Science Reviews*. 2014; 102: 96-  
1000 110.
- 1001 55. Borsch T, Wilde V. Pollen variability within species, populations, and individuals, with  
1002 particular reference to *Nelumbo nucifera*. In: Harley M, Blackmore S, Morton C, editors. *Pollen*  
1003 *and Spores: Morphology and Biology*. Royal Botanic Gardens, Kew; 2000. pp. 285-299.
- 1004 56. Colwell RK, Chao A, Gotelli NJ, Lin SY, Mao CX, Chazdon RL, Longino JT. Models and  
1005 estimators linking individual-based and sample-based rarefaction, extrapolation, and  
1006 comparison of assemblages. *Journal of Plant Ecology*. 2012; 5, 3-21.
- 1007 57. Colwell RK. *EstimatesS: Statistical estimation of species richness and shared species from*  
1008 *samples*. Version 9. 2013. Available from: <http://viceroy.eeb.uconn.edu/EstimateS/>

- 1009 58. Keen HF, Gosling WD, Hanke F, Miller CS, Montoya E, Valencia BG, Williams JJ. A  
1010 statistical sub-sampling tool for extracting vegetation community and diversity information  
1011 from pollen assemblage data. *Palaeogeography, Palaeoclimatology, Palaeoecology*. 2014; 408:  
1012 48-59.
- 1013 59. Whittaker RH. Evolution and measurement of species diversity. *Taxon*. 1972; 21: 213-251.
- 1014 60. Harrington GJ, Jaramillo CA. Paratropical floral extinction in the Late Palaeocene–Early  
1015 Eocene. *Journal of the Geological Society London*. 2007; 164: 323–332.
- 1016 61. Birks HJB, Felde VA, Bjune AE, Grytnes JA, Seppä H, Giesecke T. Does pollen-  
1017 assemblage richness reflect floristic richness? A review of recent developments and future  
1018 challenges. *Review of Palaeobotany and Palynology*. 2016; 228: 1–25.
- 1019 62. Ellison AM. Partitioning diversity. *Ecology*. 2010; 91: 1962–1963.
- 1020 63. Beck J, Holloway JD, Schwanghart W. Undersampling and the measurement of beta  
1021 diversity. *Methods in Ecology and Evolution*. 2013; 4: 370–382.
- 1022 64. Whittaker RH. Vegetation of the Siskiyou mountains, Oregon and California. *Ecological*  
1023 *Monographs*. 1960; 30: 279–338.
- 1024 65. Koleff P, Gaston KJ, Lennon JJ. Measuring beta diversity for presence–absence data.  
1025 *Journal of Animal Ecology*. 2003; 72: 367–382.
- 1026 66. Gotelli NJ, Colwell, RK. Estimating species richness. In Magurran AE, McGill BJ, editors.  
1027 *Biological diversity. Frontiers in measurement and assessment*. Oxford University Press, New  
1028 York; 2010. pp. 39-54.
- 1029 67. Smith B, Wilson JB. A consumer's guide to evenness indices. *Oikos*. 1996; 76: 70–82.
- 1030 68. Inglis GN, Collinson ME, Riegel W, Wilde V, Robson BE, Lenz OK, Pancost RD.  
1031 Ecological and biogeochemical change in an early Paleogene peat-forming environment:

- 1032 Linking biomarkers and palynology, *Palaeogeography, Palaeoclimatology, Palaeoecology*.  
1033 2015; 438: 245-255.
- 1034 69. Gastaldo RA, Allen GP, Huc AY. Detrital peat formation in the tropical Mahakam River  
1035 delta, Kalimantan, eastern Borneo: Sedimentation, plant composition, and geochemistry. In:  
1036 Cobb JC, Blaine C, editors. *Modern and Ancient Coal-Forming Environments* Mires:  
1037 Geological Society of America Special Paper. 1993; 286: pp. 107–118.
- 1038 70. Gastaldo, RA. The genesis and sedimentation of phytoclasts with examples from coastal  
1039 environments. In: Traverse A, editor. *Sedimentation of Organic Particles*. Cambridge  
1040 University Press; 1994. pp. 103-127.
- 1041 71. Krebs CJ. *Ecological methodology*. Harper and Row Publishers Inc., New York, NY; 1989.
- 1042 72. Smith AHV. The sequence of microspore assemblages associated with the occurrence of  
1043 crassidurite in coal seams of Yorkshire. *Geological Magazine*. 1957; 94: 345-363.
- 1044 73. Smith AHV. The palaeoecology of carboniferous peats based on the miospores and  
1045 petrography of bituminous coals. *Proceedings of the Yorkshire Geological Society*. 1962; 33:  
1046 423-474.
- 1047 74. Smith AVH. Seam profiles and seam characters. In: Murchison D, Westoll TS, editors. *Coal*  
1048 *and coal-bearing strata*. Elsevier, New York.;1968. pp. 31-40.
- 1049 75. Dai S, Bechtel A, Eble CF, Flores RM, French D, Graham IT, et al. Recognition of peat  
1050 depositional environments in coal: A review. *International Journal of Coal Geology*. 2020.  
1051 doi: 10.1016/j.coal.2019.103383
- 1052 76. Teichmüller M. Rekonstruktion verschiedener Moortypen des Hauptflözes der  
1053 niederrheinischen Braunkohle. *Fortschritte der Geologie des Rheinlandes und Westfalen*.1958;  
1054 2: 539-612.

- 1055 77. Teichmüller M. The genesis of coal from the viewpoint of coal petrology. International  
1056 Journal of Coal Geology. 1989; 12: 1-87.
- 1057 78. Lenz OK, Riegel W. Isopollen maps as a tool for the reconstruction of a coastalswamp from  
1058 the Middle Eocene at Helmstedt (Northern Germany). Facies. 2001; 45: 177–194.
- 1059 79. Wilde V, Lenz OK, Riegel W. Mangrove structure and development in the Lower and  
1060 Middle Eocene of Helmstedt, northern Germany. Terra Nostra. 2008; 2: 306-307.
- 1061 80. Natlandsmyr B, Hjelle KL. Long-term vegetation dynamics and land-use history: Providing  
1062 a baseline for conservation strategies in protected *Alnus glutinosa* swamp woodlands. Forest  
1063 Ecology and Management. 2016; 372: 78-92.
- 1064 81. Houston DT, de Rigo D, Caudullo G. *Alnus incana* in Europe: distribution, habitat, usage  
1065 and threats. In: San-Miguel-Ayanz J, de Rigo D, Caudullo G, Houston DT, Mauri A. editors.  
1066 European Atlas of Forest Tree Species. Luxembourg: Publication Office of the European Union;  
1067 2016. pp. e01ff87+.
- 1068 82. Fralish JS, Franklin SB. Taxonomy and Ecology of Woody Plants in North American  
1069 Forests (Excluding Mexico and Subtropical Florida). New York: John Wiley & Sons; 2002.
- 1070 83. Davis JH. The peat deposits of Florida; their occurrence, development and uses. Florida  
1071 Geological Survey Bulletin. 1946; 30: 1-247.
- 1072 84. Spackman W, Riegel WL, Dolsen CP. Geological and biological interactions in the swamp-  
1073 marsh complex of Southern Florida. In: Dapples EC, Hopkins ME, editors. Environments of  
1074 Coal Deposition. Geological Society of America, Special Paper. 1969; 114: pp. 1-35.
- 1075 85. Moore PD. Ecological and hydrological aspects of peat formation. In: Scott AC, editor.  
1076 Coal and Coal-bearing Strata: Recent Advances. Geological Society, London, Special  
1077 Publications. 1987; 32: pp. 7-16.

- 1078 86. Moore TA, Hilbert RE. Petrographic and anatomical characteristics of plant material from  
1079 two peat deposits of Holocenc and Miocene age, Kalimantan, Indonesia. Review of  
1080 Palaeobotany and Palynology. 1992; 72: 199-227.
- 1081 87. Simpson MJA., Macintosh DF, Cloughley JB., Stuart AE. Past, present and future  
1082 utilisation of *Myrica gale* (Myricaceae). Economic Botany. 1996; 50: 122-129.
- 1083 88. Skene KR, Sprent JI, Raven JA, Herdman L. *Myrica gale* L. Biological flora of the British  
1084 Isles. Journal of Ecology 2000; 88: 1079–1094.
- 1085 89. van Breemen N. How Sphagnum bogs down other plants. Trends in Ecology & Evolution.  
1086 1995; 10: 270–275.
- 1087 90. Clymo R. 1984. The limits to peat bog growth. Philosophical Transactions of the Royal  
1088 Society B. 1984; B 303 (1117): 605–654.
- 1089 91. Page SE, Rieley JO, Shotyk W, Weiss D. Interdependence of peat and vegetation in tropical  
1090 swamp forest. Philosophical Transactions of the Royal Society B. 1999; 354: 1885-1897.
- 1091 92. Hochuli PA. Ursprung und Verbreitung der Restionaceen. Vierteljahrsschrift der  
1092 Naturforschenden Gesellschaft Zürich. 1979; 124: 109–130.
- 1093 93. Heywood VH. Flowering Plants of the World. Updated ed. Oxford University Press, New  
1094 York; 1993.
- 1095 94. Daly RJ, Jolley DW. What was the nature and role of Normapolles angiosperms? A case  
1096 study from the earliest Cenozoic of Eastern Europe. Palaeogeography, Palaeoclimatology,  
1097 Palaeoecology. 2015; 418: 141-149.
- 1098 95. Loftin SS, Guyette MQ, Wetzell PR. Evaluation of Vegetation-Fire Dynamics in the  
1099 Okefenokee National Wildlife Refuge, Georgia, USA, with Bayesian Belief Networks.  
1100 Wetlands. 2018; 38: 819-834.



- 1101 96. Cypert E. The effect of fires in the Okefenokee Swamp in 1954 and 1955. *The American*  
1102 *Midland Naturalist*. 1961; 66: 485-503.
- 1103 97. Cohen AD. Petrography and paleoecology of Holocene peats from the Okefenokee swamp-  
1104 marsh complex of Georgia. *Journal of Sedimentary Petrology*. 1974; 44: 716-726.
- 1105 98. Izlar, RL. Some comments on fire and climate in the Okefenokee swamp-marsh complex.  
1106 In: Cohen AD, Casagrande DJ, Andrejko MJ, Best GR, editors. *The Okefenokee swamp: its*  
1107 *natural history, geology and geochemistry*. 1984. pp. 70-85.
- 1108 99. Harrington GJ. Impact of Paleocene/Eocene Greenhouse Warming on North American  
1109 Paratropical Forests. *Palaios*. 2001; 16: 266–278.
- 1110 100. Harrington GJ. Geographic patterns in the floral response to Paleocene–Eocene warming.  
1111 In: Wing SL, Gingerich PD, Schmitz B, Thomas E, editors. *Causes and consequences of*  
1112 *globally warm climates in the early Paleogene*. Geological Society of America, Special Paper.  
1113 2003; 369: pp. 381–393.
- 1114 101. Page SE, Rieley JO, Wust R. Chapter 7. Lowland tropical peatlands of Southeast Asia. In:  
1115 Martini IP, Martinez Cortizas A., Chesworth W, editors. *Developments in Earth Surface*  
1116 *Processes. Peatlands — Evolution and Records of Environmental and Climate Changes*. 2006;  
1117 9: pp. 145–172.
- 1118 102. Phillips S, Rouse GE, Bustin RM. Vegetation zones and diagnostic pollen profiles of a  
1119 coastal peat swamp, Bocas del Toro, Panamá. *Palaeogeography, Palaeoclimatology,*  
1120 *Palaeoecology*. 2001; 128: 301-338.
- 1121 103. Inglis GN, Collinson ME, Riegel W, Wilde V, Farnsworth A, Lunt DJ, et al. Mid-latitude  
1122 continental temperatures through the early Eocene in western Europe. *Earth and Planetary*  
1123 *Science Letters*. 2017; 460: 86-96.

- 1124 104. Collinson ME, Steart DC, Harrington GJ, Hooker JJ, Scott AC, Allen LO, Glasspool IJ,  
1125 Gibbonsm SJ. Palynological evidence of vegetation dynamics in response to  
1126 palaeoenvironmental change across the onset of the Paleocene-Eocene Thermal Maximum at  
1127 Cobham, Southern England. *Grana*. 2009; 48: 38-66.
- 1128 105. Garel S, Schnyder J, Jacob J, Dupuis C, Boussafir M, Le Milbeau C, Storme JY, Iakovleva  
1129 AI, Yans J, Baudin F. Paleohydrological and paleoenvironmental changes recorded in terrestrial  
1130 sediments of the Paleocene–Eocene boundary (Normandy, France). *Palaeogeography,*  
1131 *Palaeoclimatology, Palaeoecology*. 2013; 376: 184–199.
- 1132 106. Greenwood DR, Basinger JF. The paleoecology of high-latitude Eocene swamp forests  
1133 from Axel Heiberg Island, Canadian High Arctic. *Review of Palaeobotany and Palynology*.  
1134 2013; 81: 83-97.
- 1135 107. Eldrett JS, Greenwood DR, Polling M, Brinkhuis H, Sluijs A. A seasonality trigger for  
1136 carbon injection at the Paleocene–Eocene Thermal Maximum. *Climate of the Past*. 2014; 10:  
1137 759–769.
- 1138 108. Weijers JWH, Schouten S, Sluijs A, Brinkhuis H, Sinninghe Damsté JS. Warm arctic  
1139 continents during the Palaeocene–Eocene thermal maximum. *Earth and Planetary Science*  
1140 *Letters*. 2007; 261: 230–238.
- 1141 109. Nichols DJ, Pocknall DT. Relationships of palynofacies to coal-depositional environments  
1142 in the upper Paleocene of the Gulf Coast Basin, Texas, and the Powder River Basin, Montana  
1143 and Wyoming. Traverse A, editor. *Sedimentation of Organic Particles*. Cambridge University  
1144 Press, Cambridge; 1994. pp. 217-237.
- 1145 110. Collinson ME, Hooker JJ, Gröcke DR. Cobham Lignite Bed and penecontemporaneous  
1146 macrofloras of southern England: A record of vegetation and fire across the Paleocene-Eocene  
1147 Thermal Maximum. *Geological Society of America, Special Paper*. 2003; 369: 333 – 349.

1148 111. Kurtz AC, Kump LR, Arthur MA, Zachos JC, Paytan A. Early Cenozoic decoupling of the  
1149 global carbon and sulphur cycles. *Palaeoceanography*. 2003; 18: 1090–1104.

1150 112. Moore EA, Kurtz AC. Black carbon in Paleocene–Eocene boundary sediments: A test of  
1151 biomass combustion as the PETM trigger. *Palaeogeography, Palaeoclimatology, Palaeoecology*.  
1152 2008; 267: 147–152.

1153

## 1154 **Supporting information**

### 1155 **S1 Appendix. Taxonomic list.**

1156 Complete list of palynomorphs from the studied sections N, S1, S2 from Seam 1 of the Schöningen  
1157 Formation including their systematic affinities. In the left column the 45 “variables” are presented,  
1158 which were used for the pollen diagrams and statistical analysis (cluster analysis, non-metric  
1159 multidimensional scaling).

1160

### 1161 **S1 Table: Raw data set of section N.**

1162 The data have been used for pollen diagram, cluster analysis and NMDS.

1163

### 1164 **S2 Table: Raw data set of section S1 (a).**

1165 The data have been used for pollen diagram, cluster analysis and NMDS.

1166

### 1167 **S3 Table: Raw data set of section S2**

1168 The data have been used for pollen diagram, cluster analysis and NMDS.

1169

### 1170 **S4 Table: Raw data set of section S1 (b)**

1171 The data have been used for diversity analysis.

1172

1173 **S5 Table: Estimations of beta diversity for Seam 1 in section S1.**

1174 Given are pairwise comparisons of 11 lignite samples from section S1 using the measure of [59,

1175 64]:  $(S/\bar{a}) - 1$ ; S, total number of species in the two compared samples,  $\bar{a}$ , average number of species

1176 in the two compared samples of Seam 1.

1177

1178

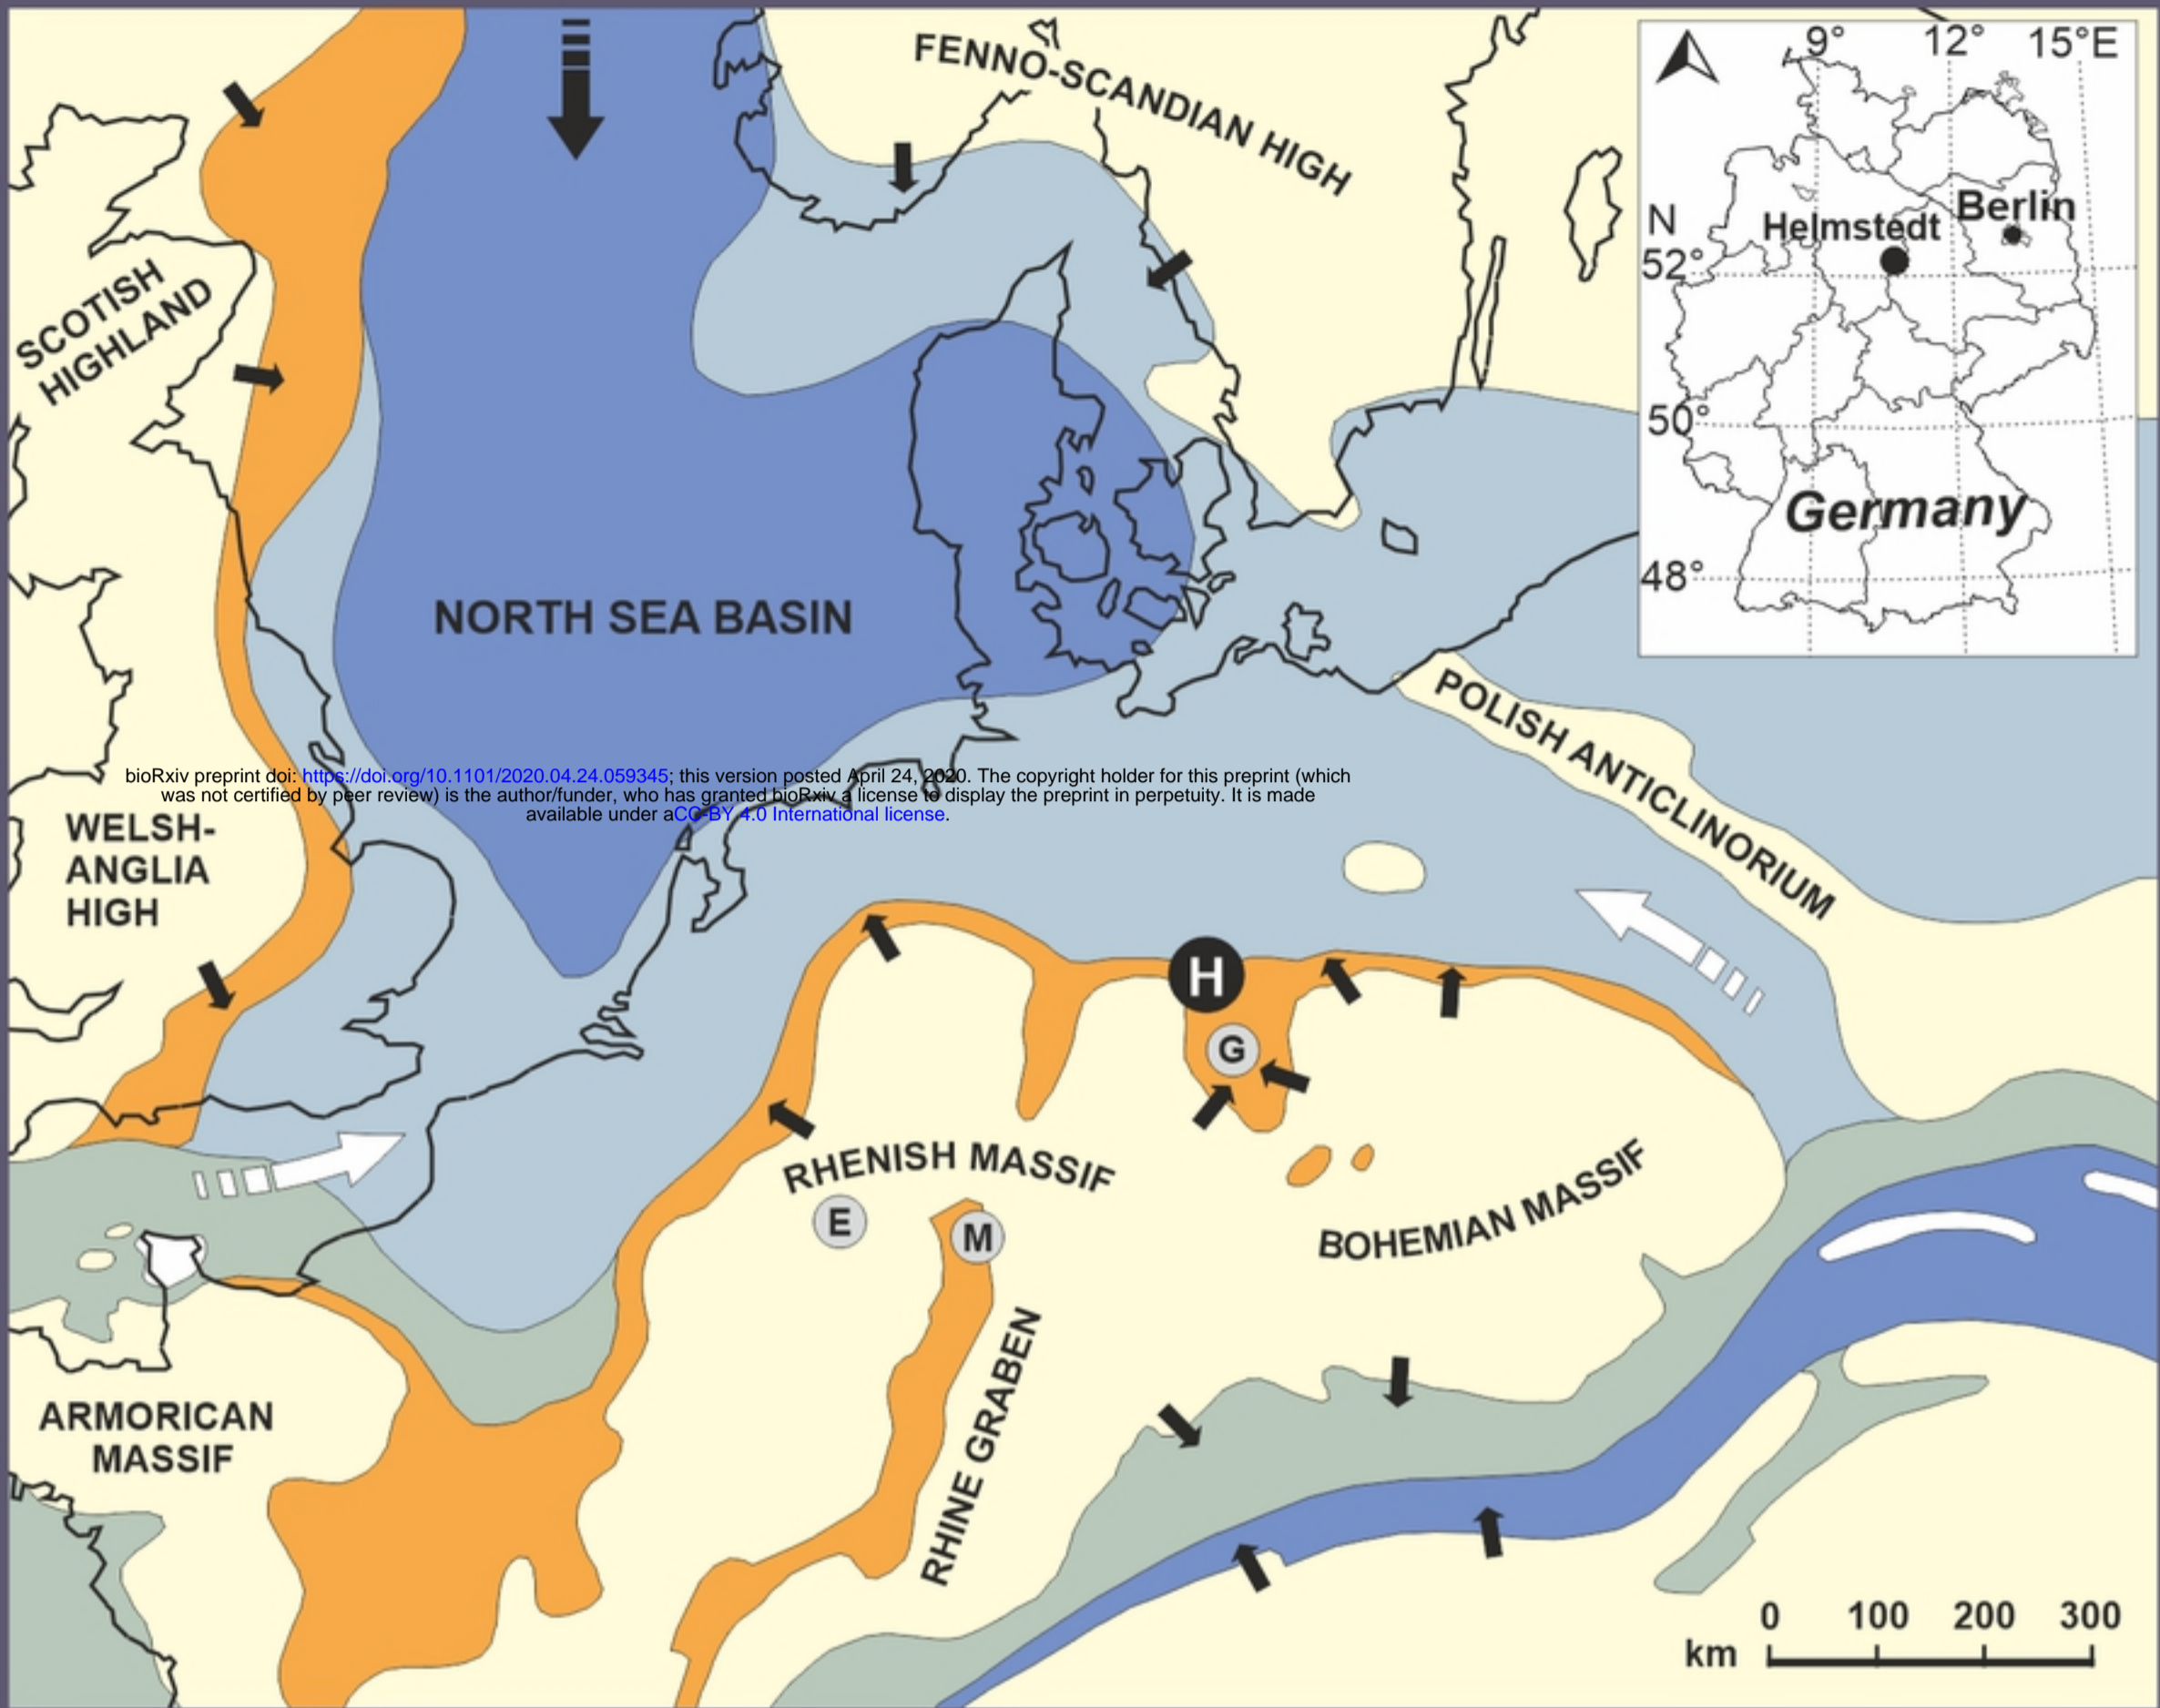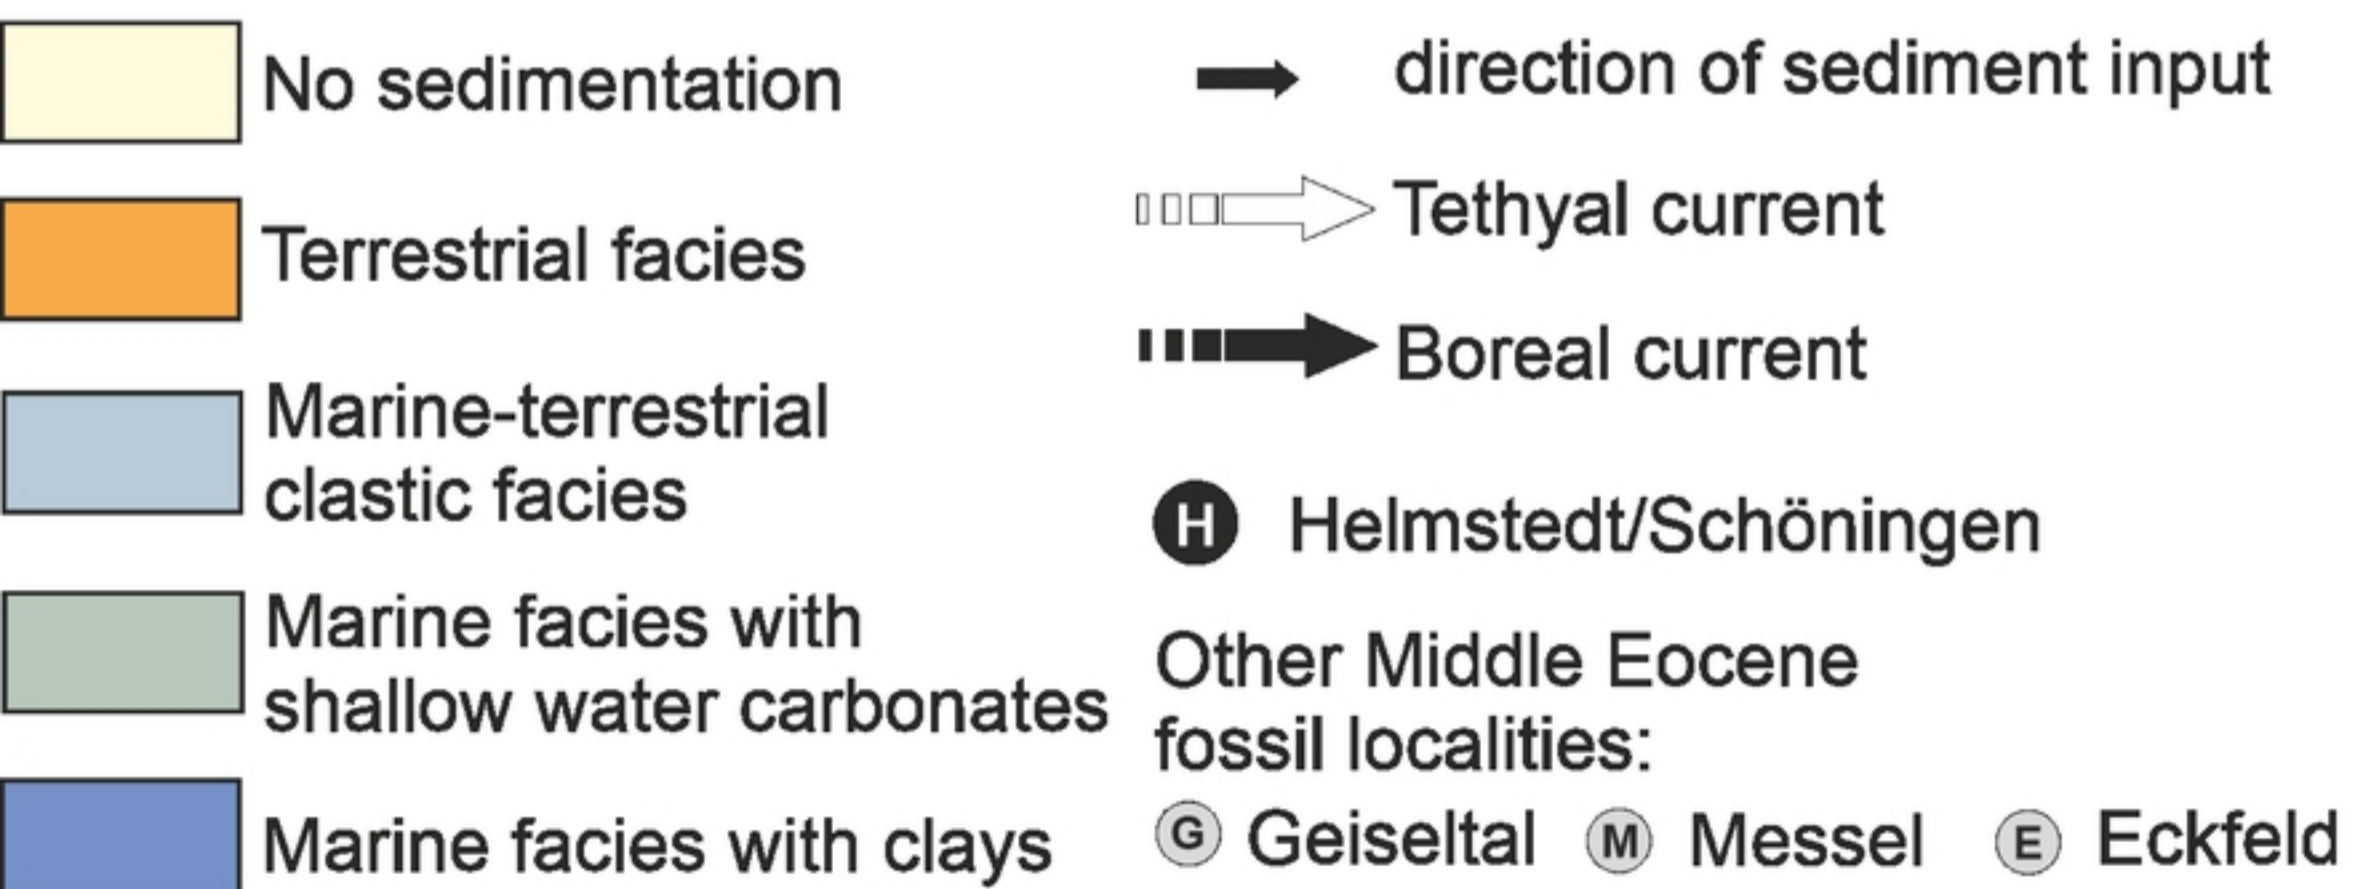

Figure 01

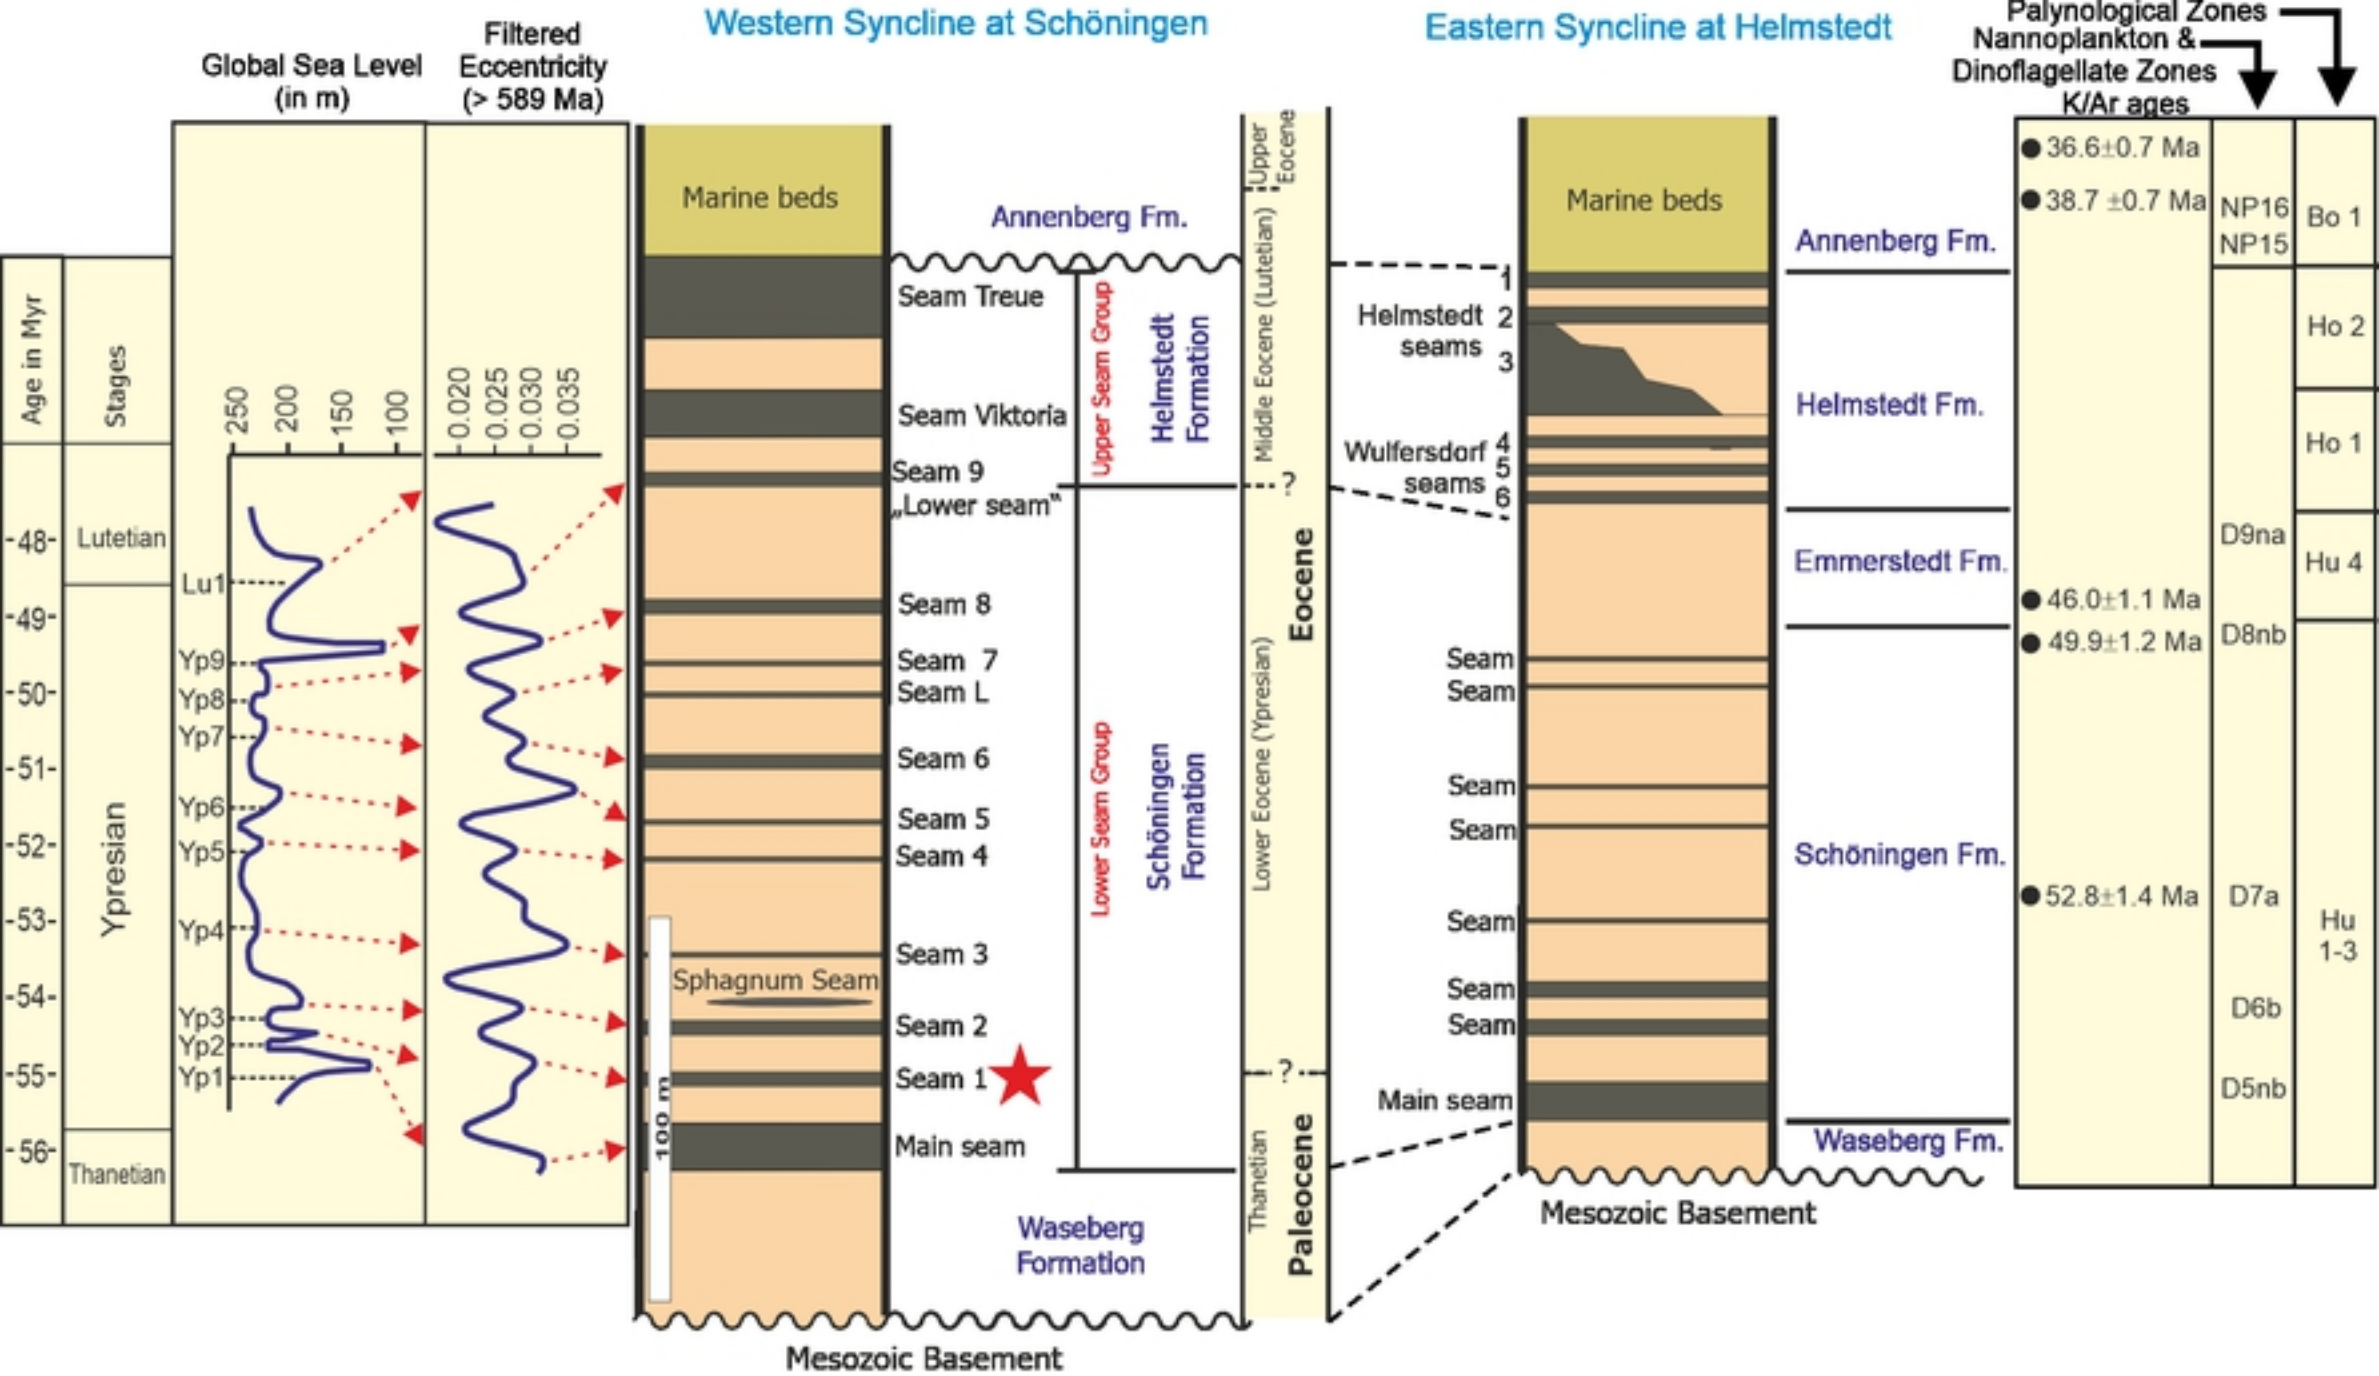

Figure 02

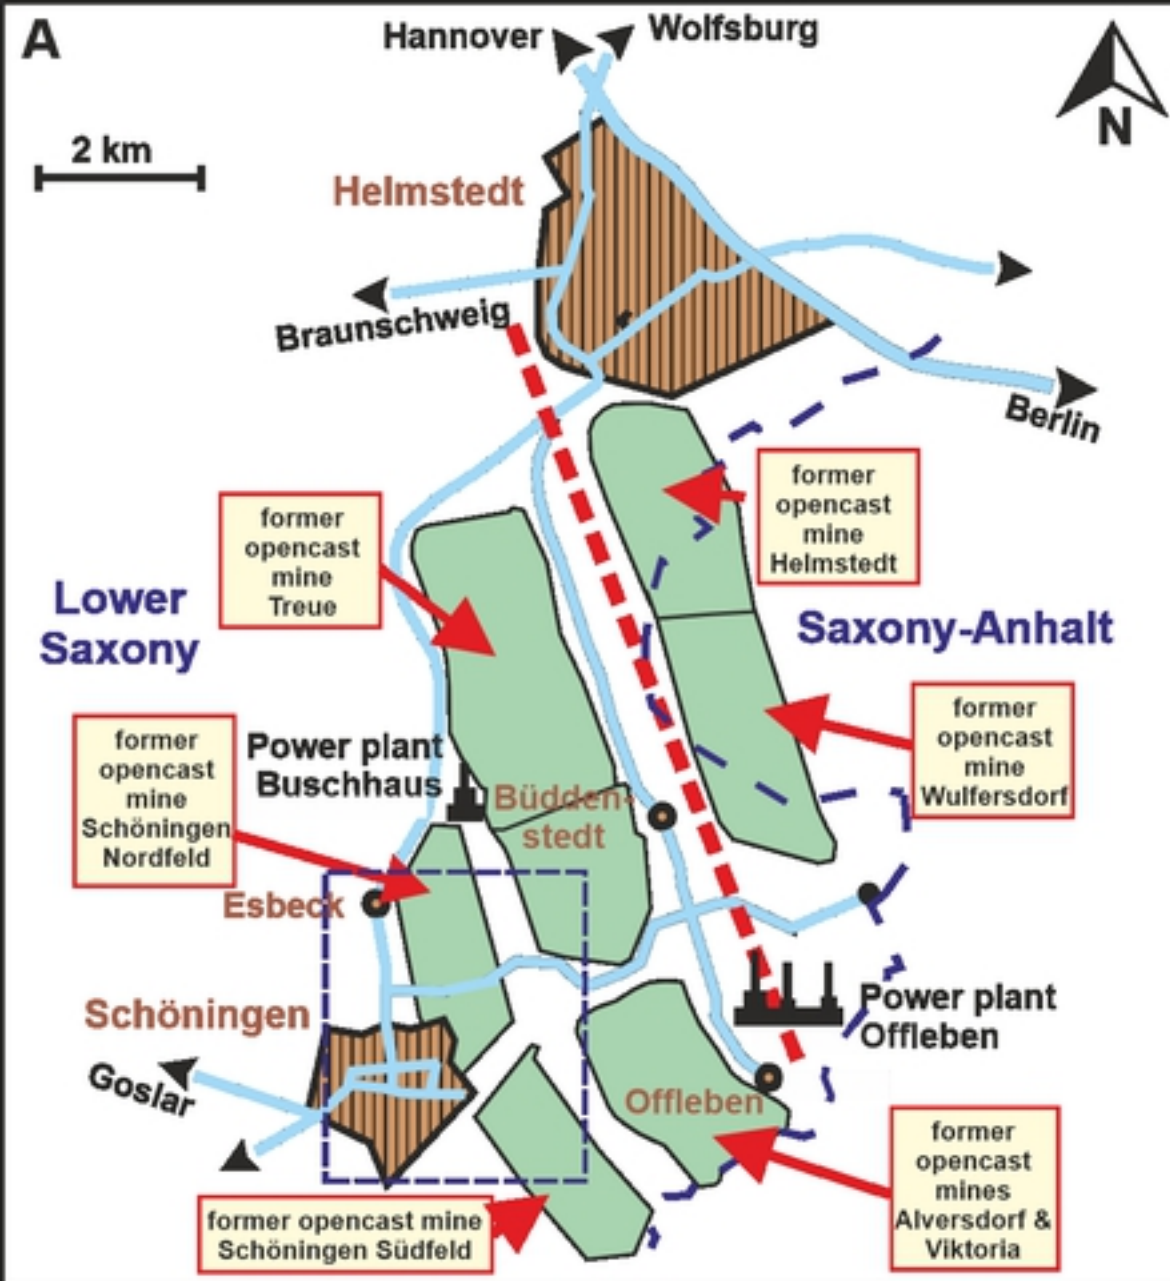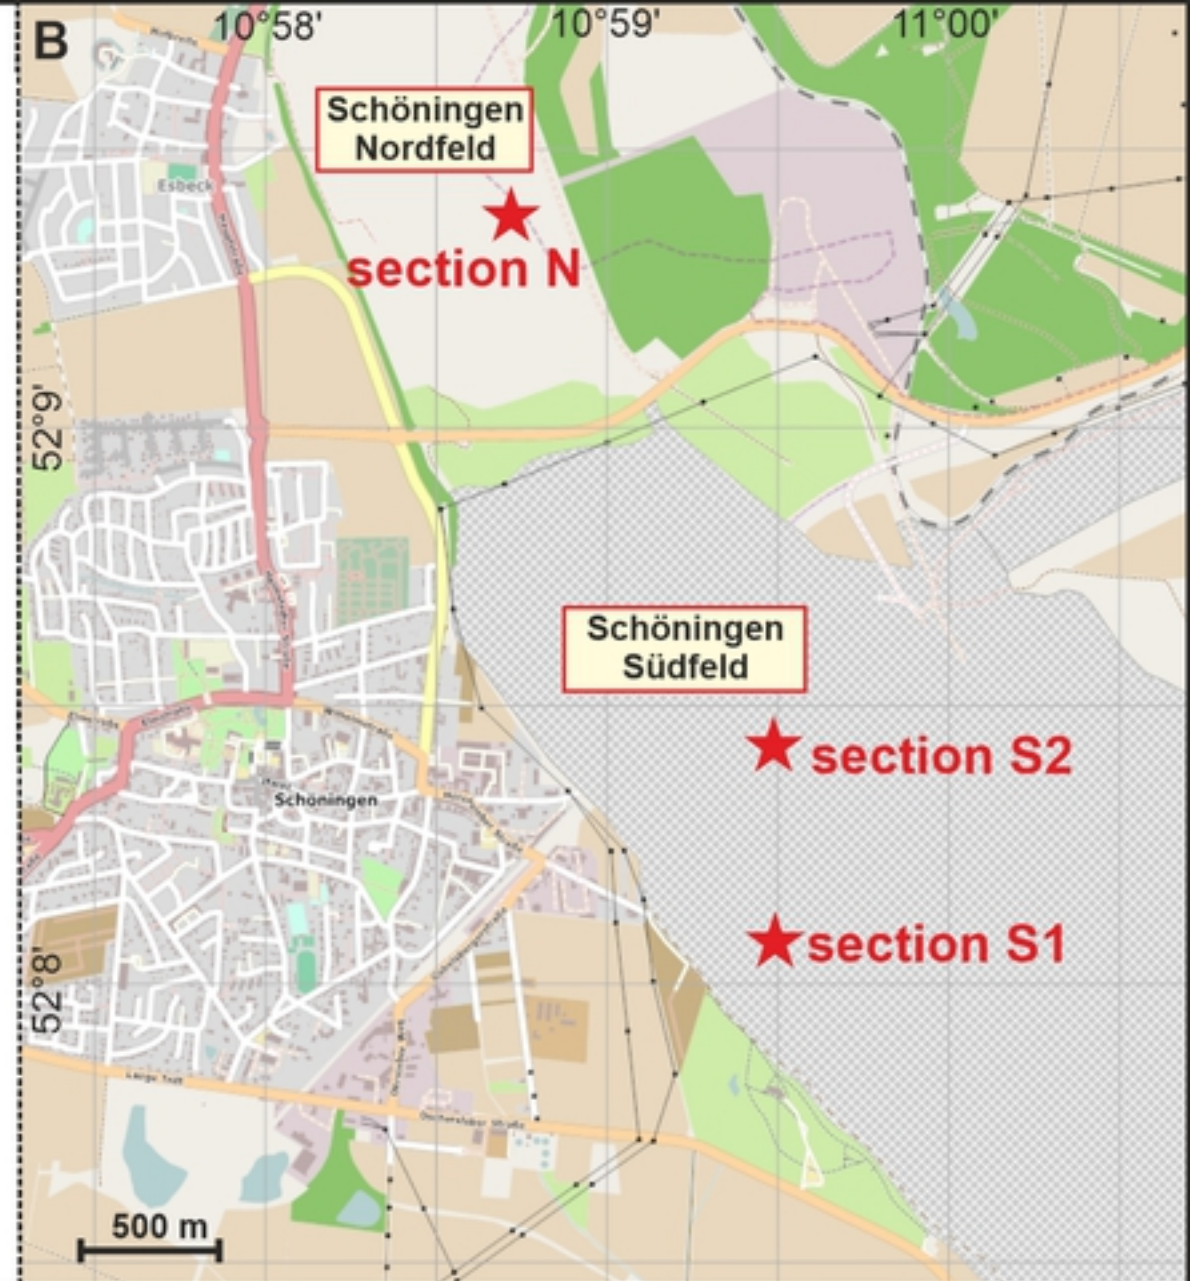

Figure 03

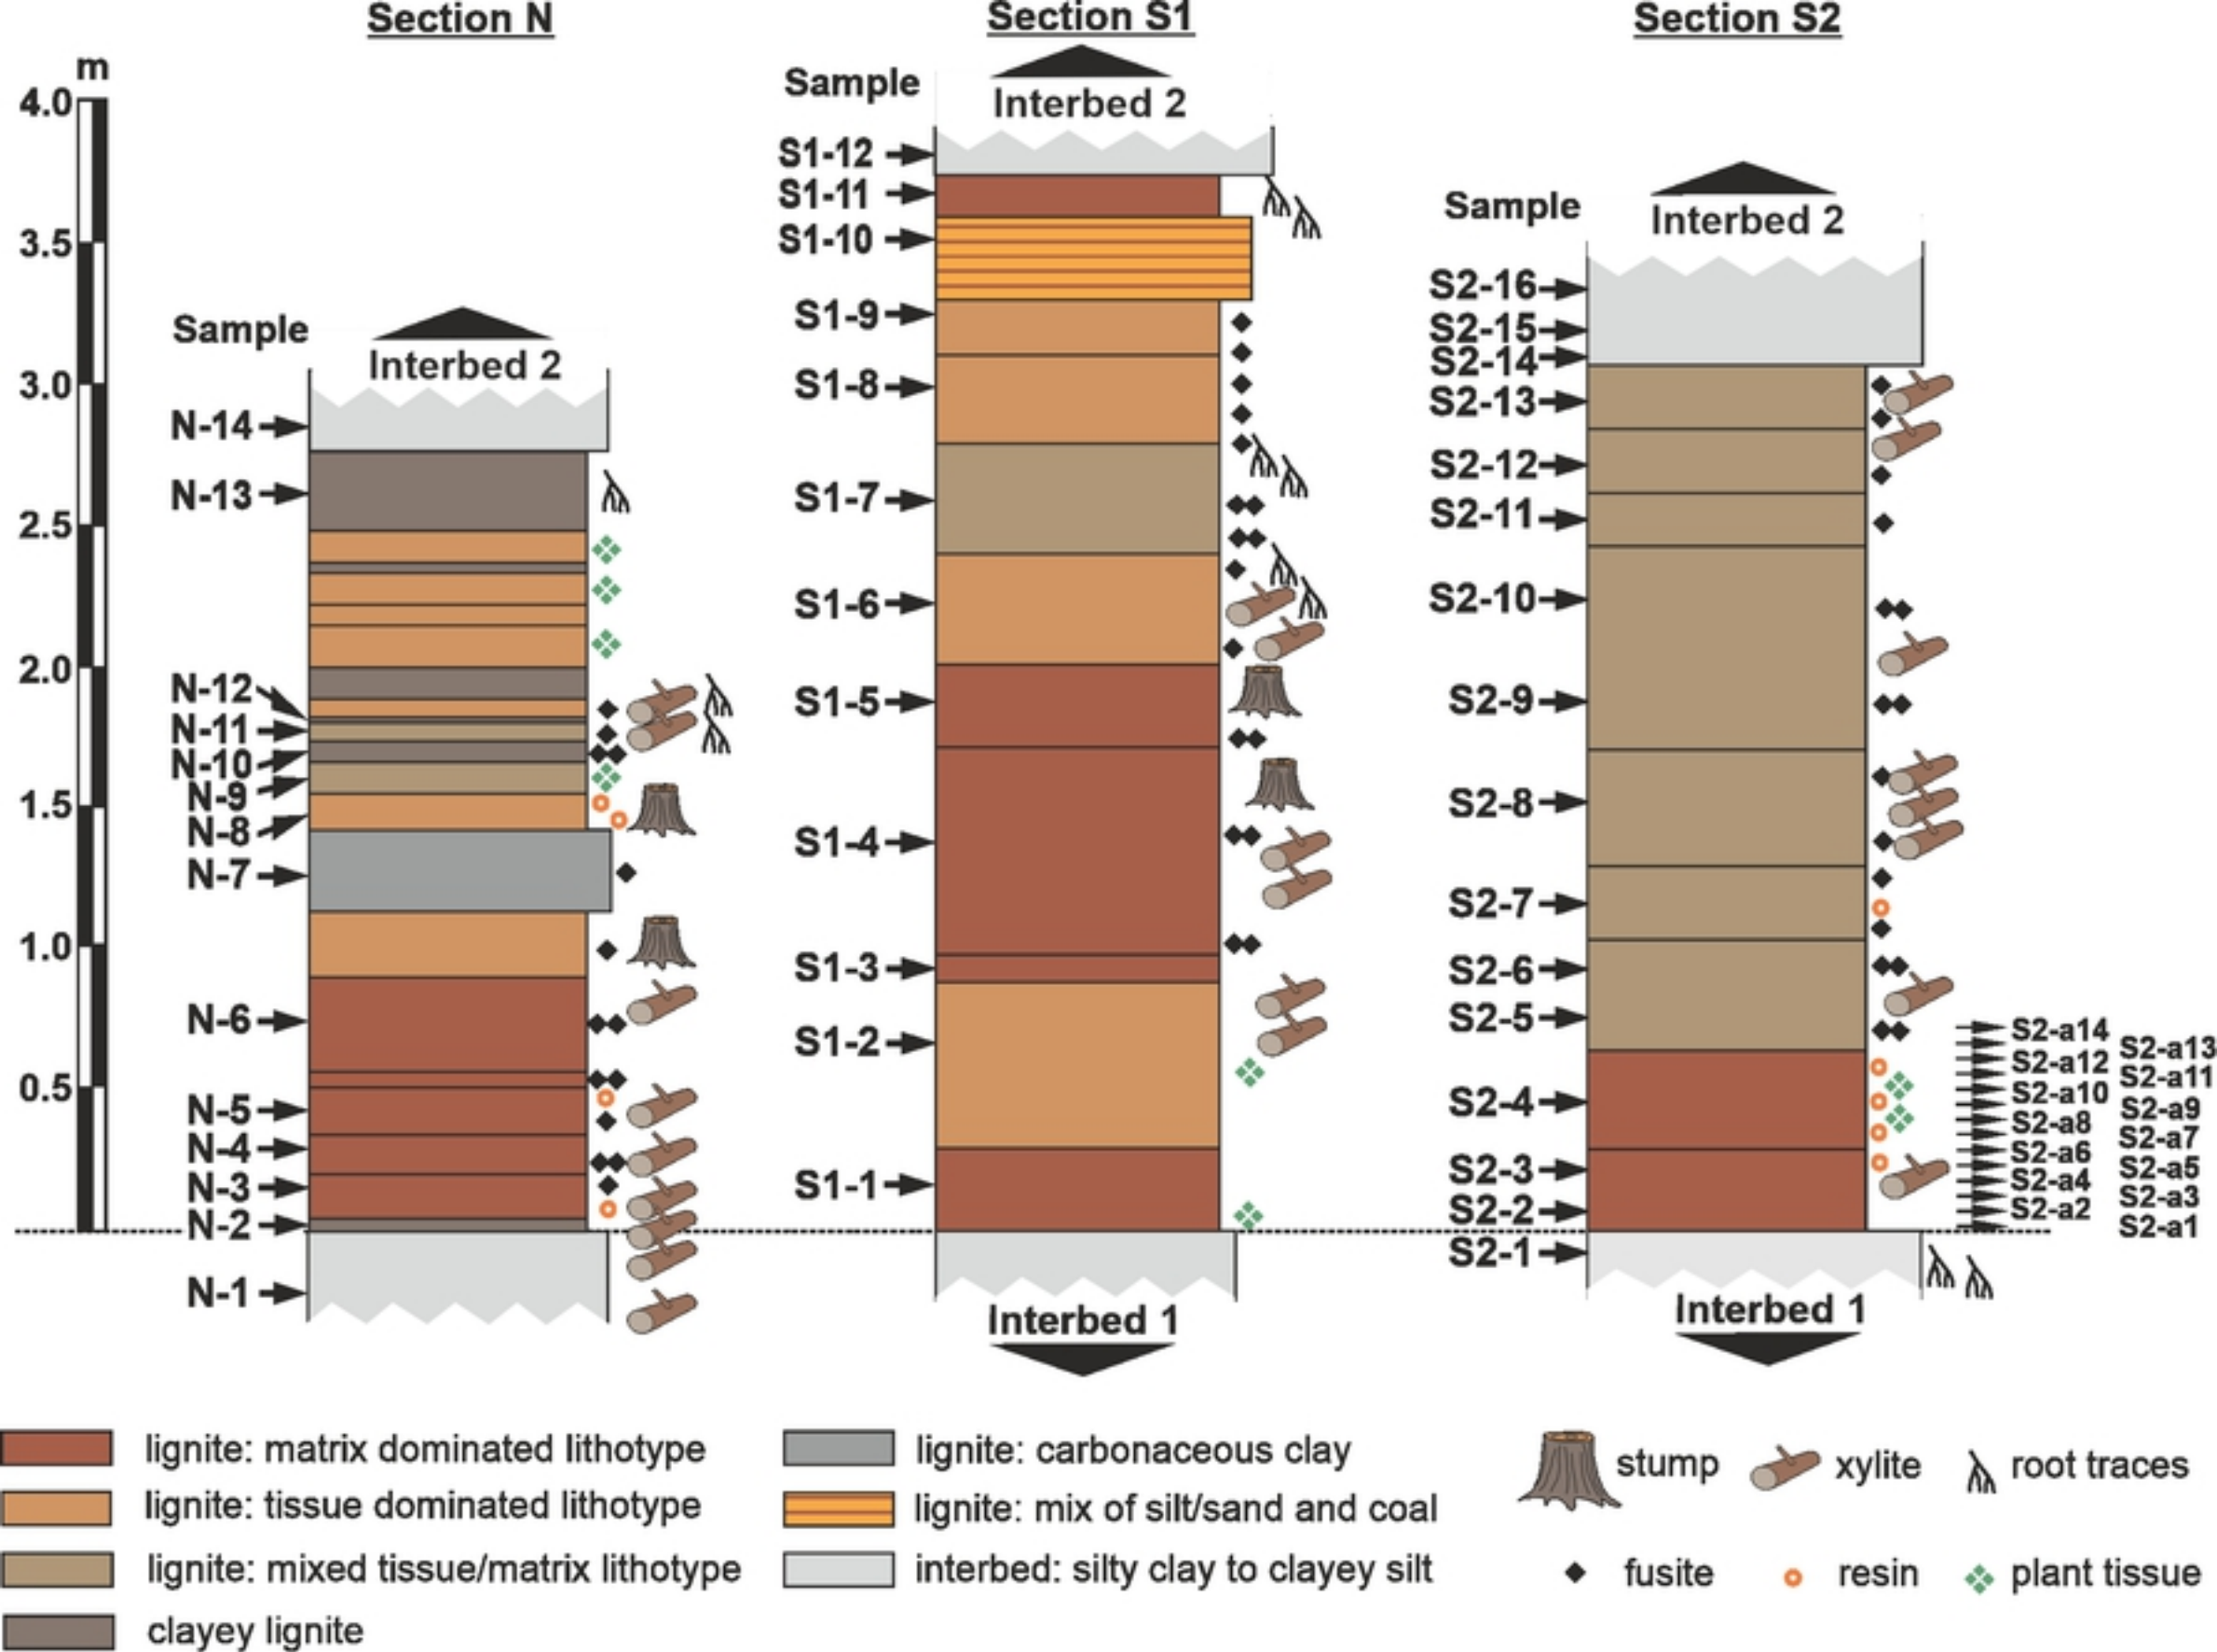

Figure 04



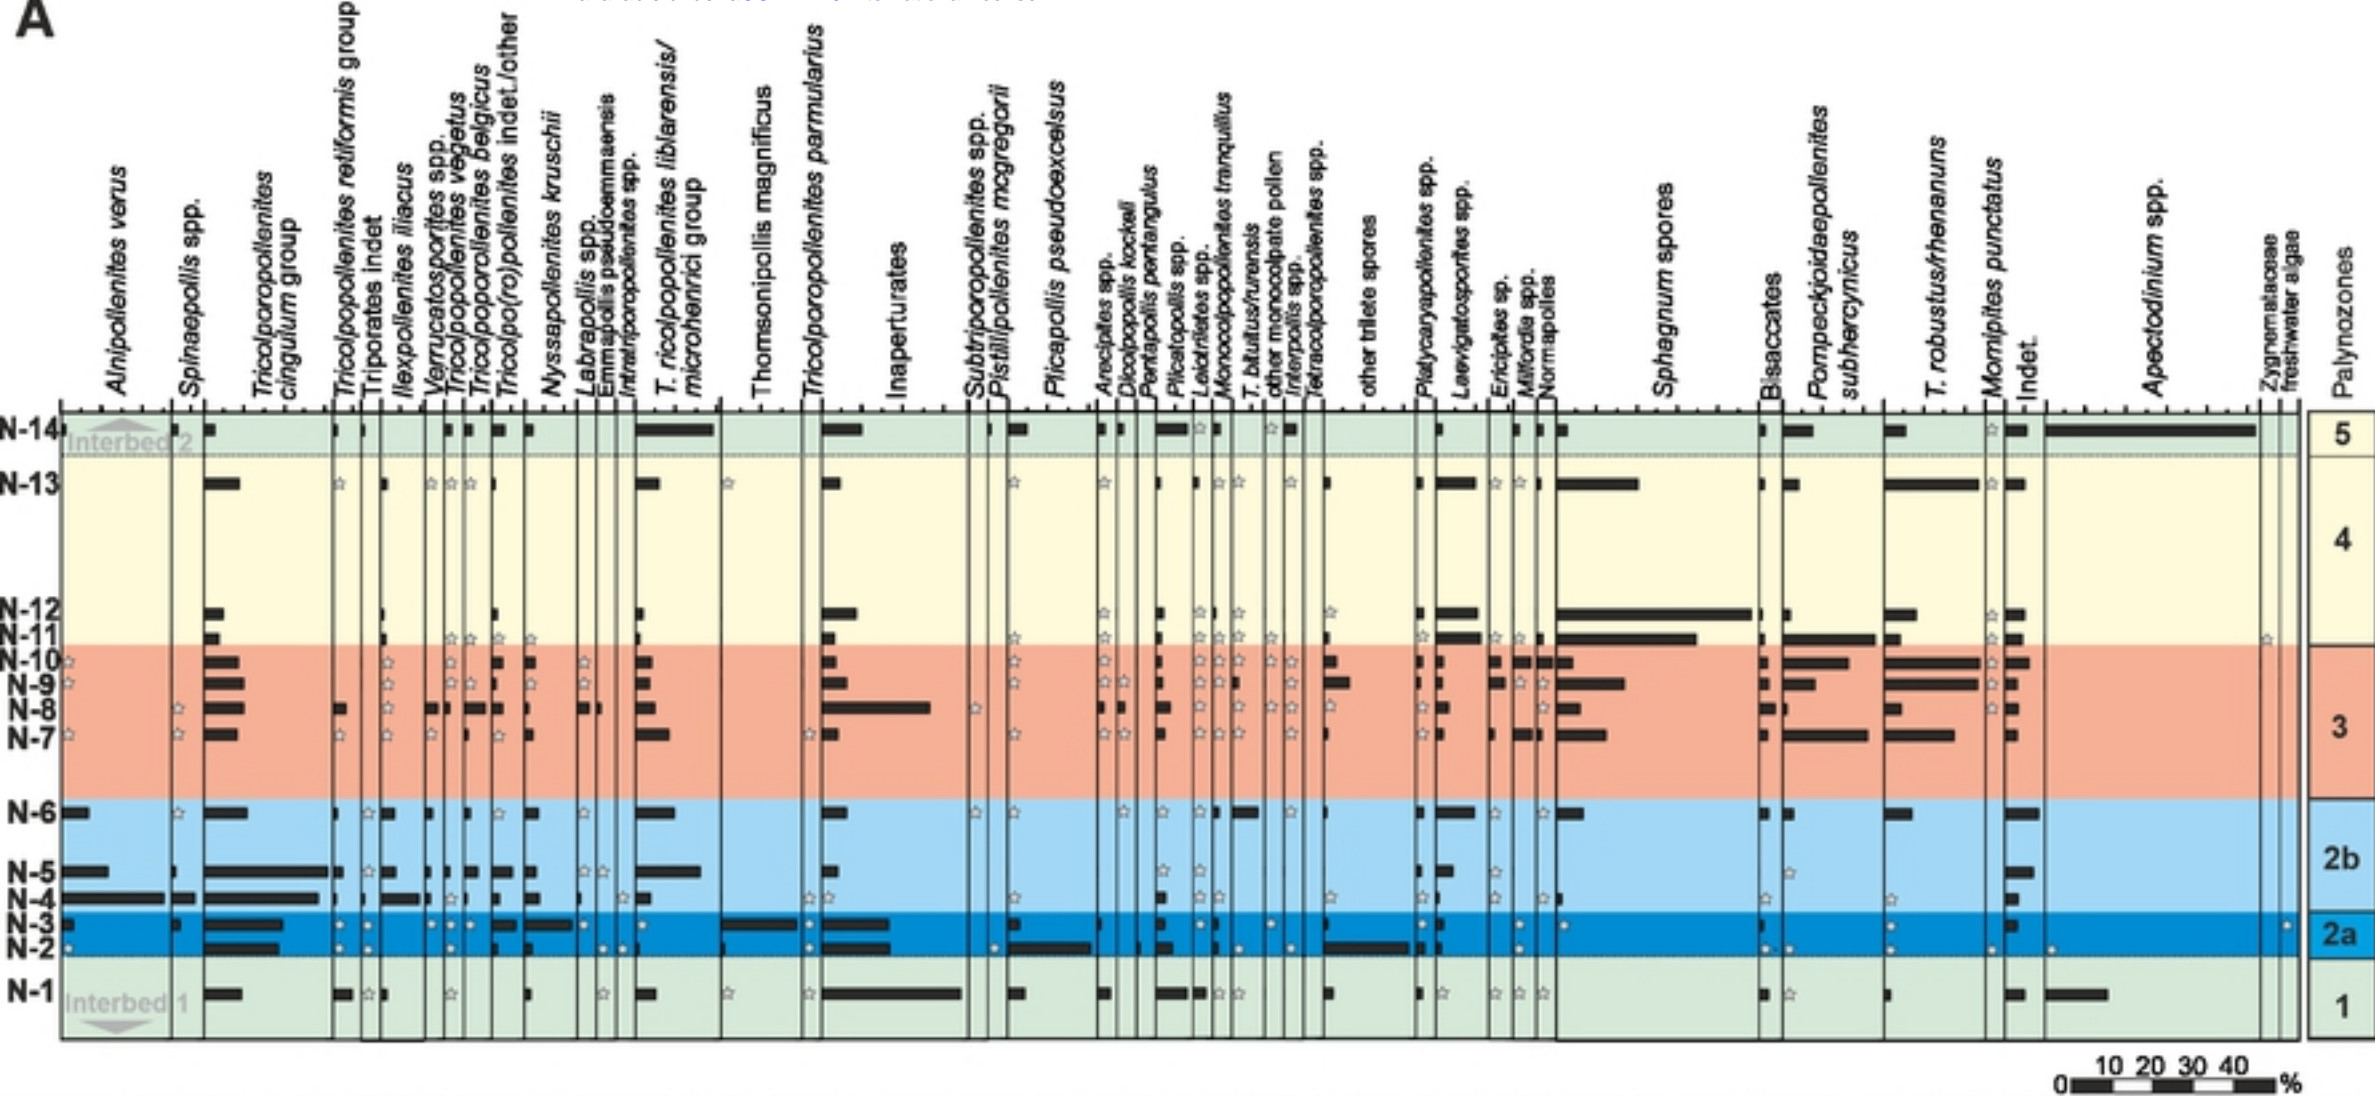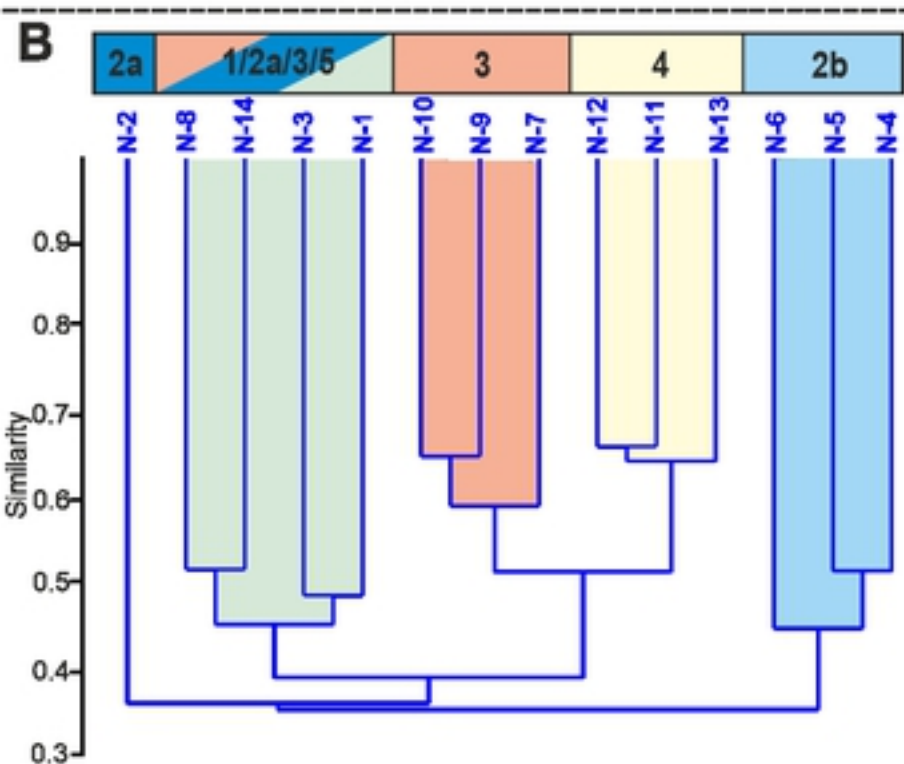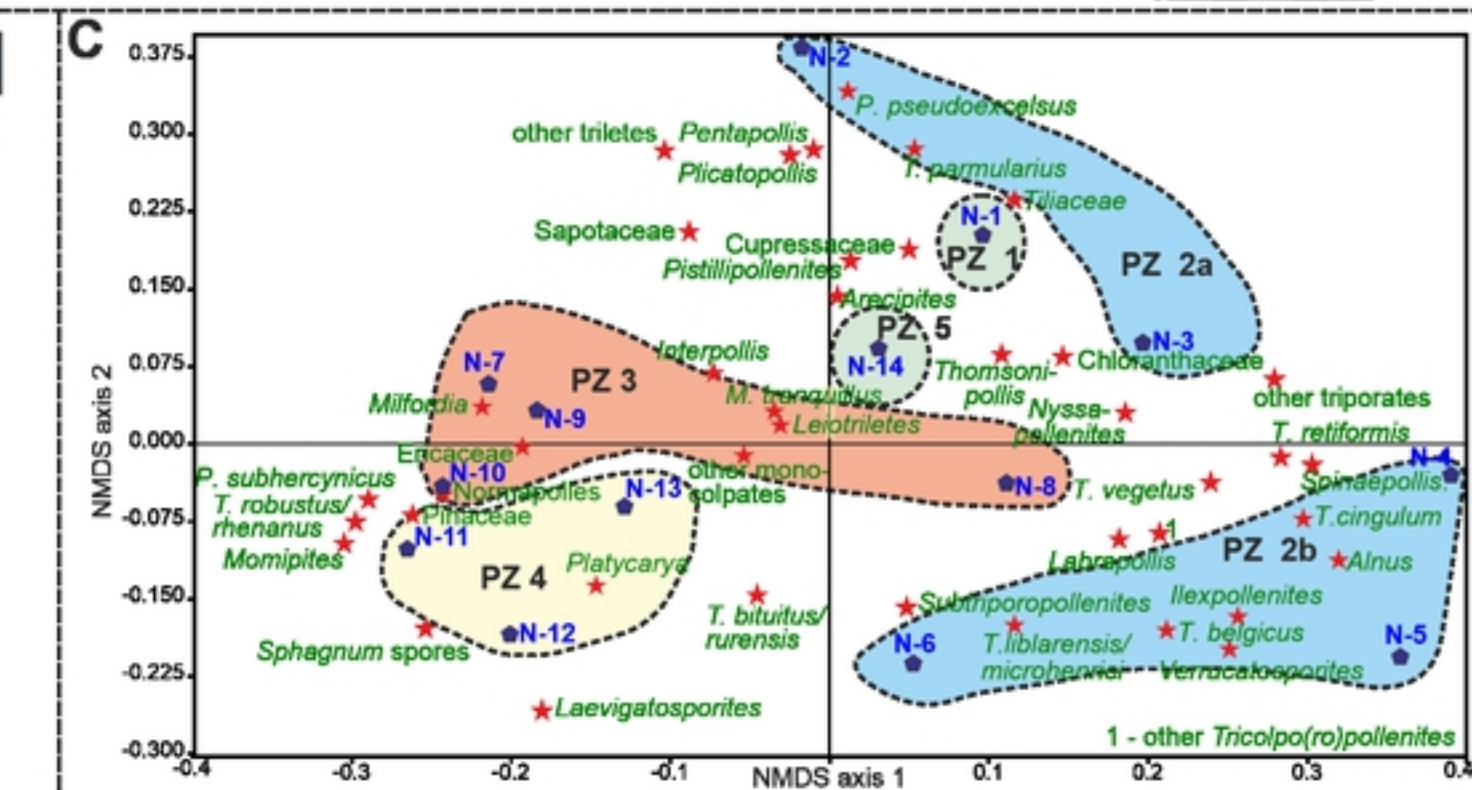

Figure 05

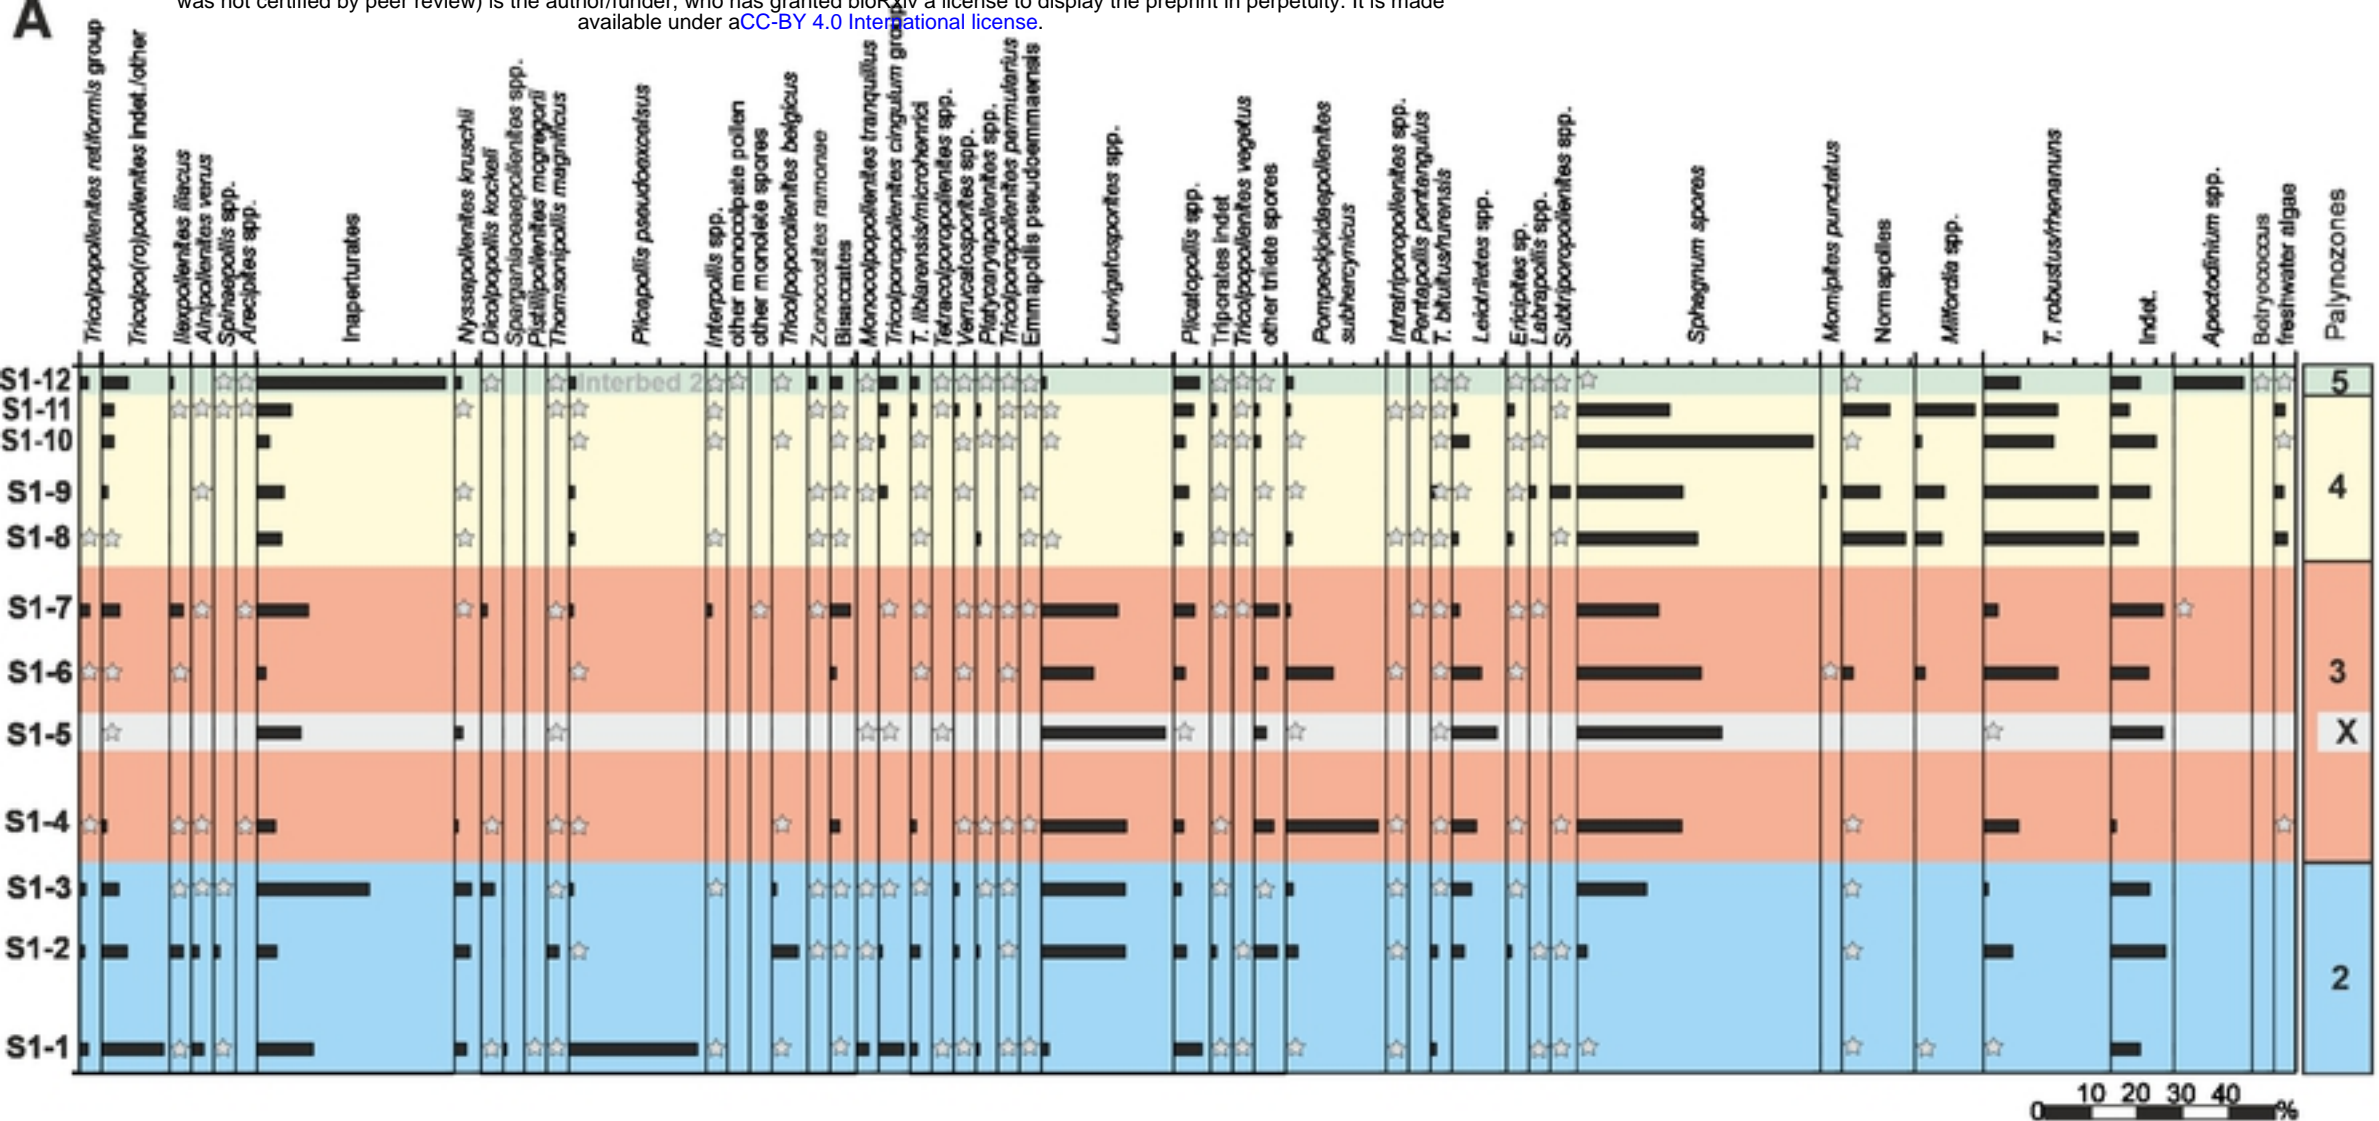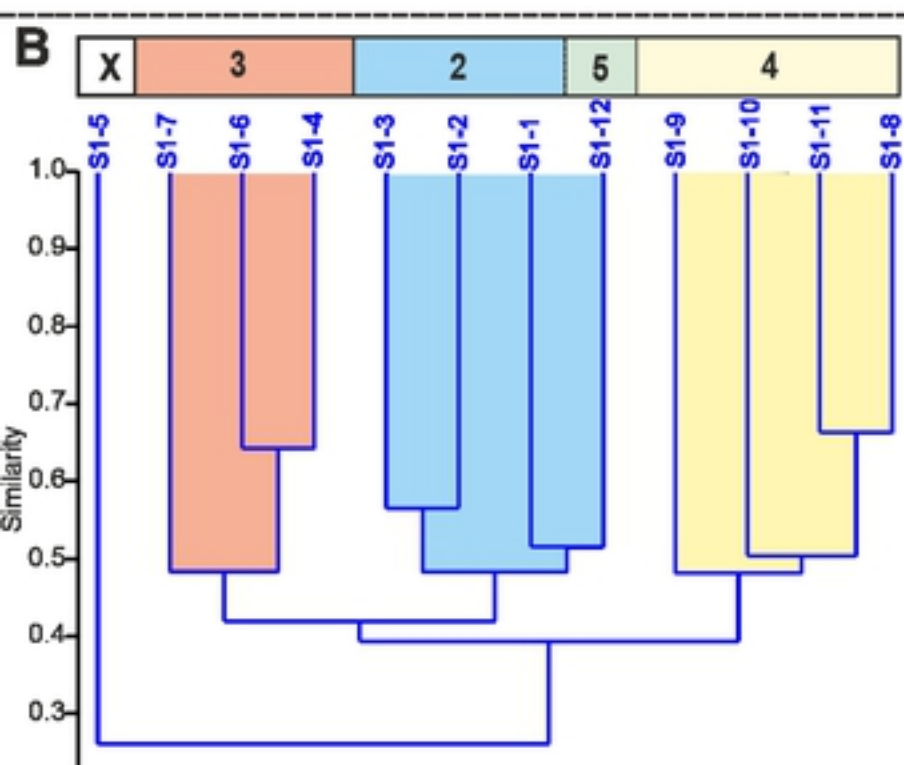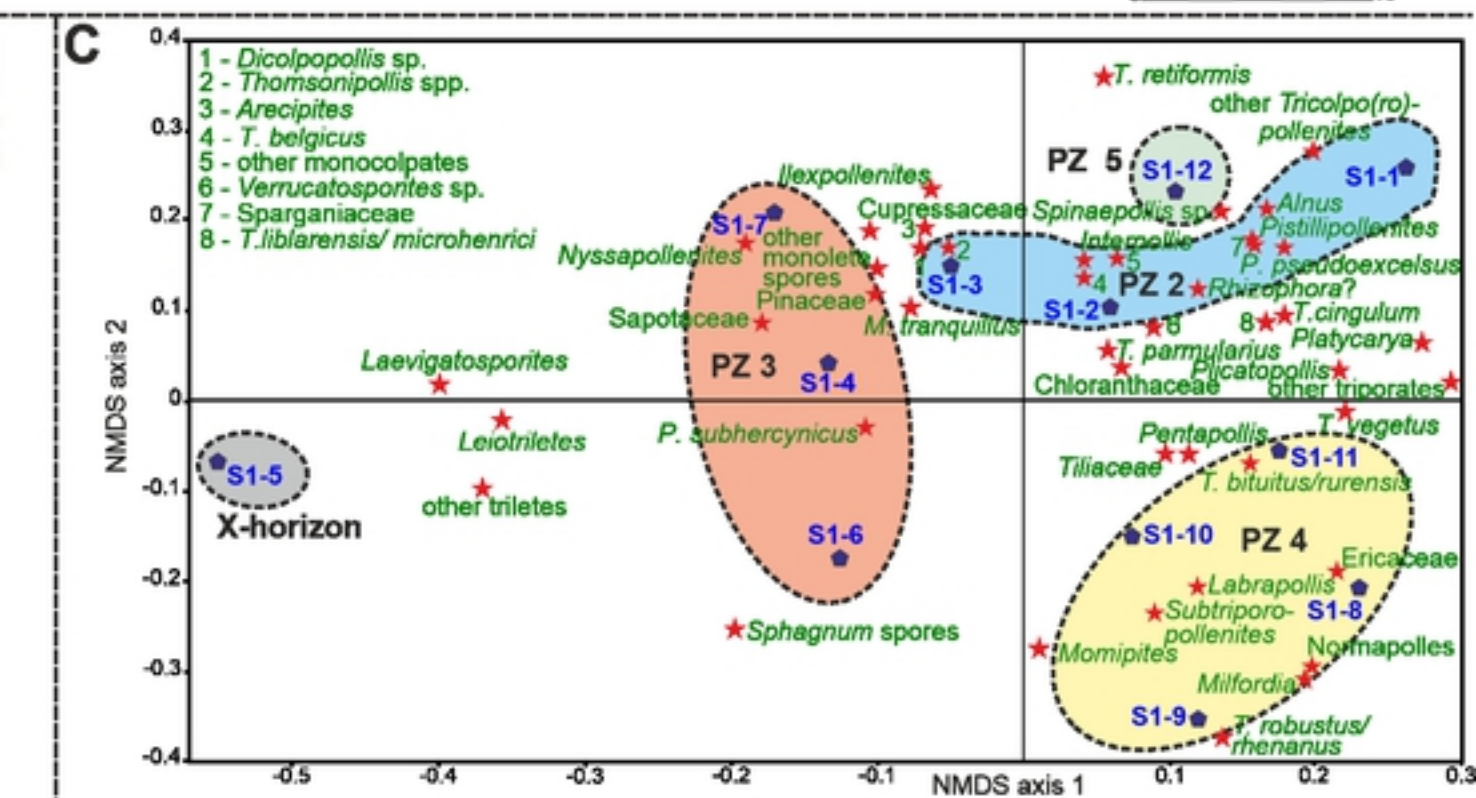

Figure 06

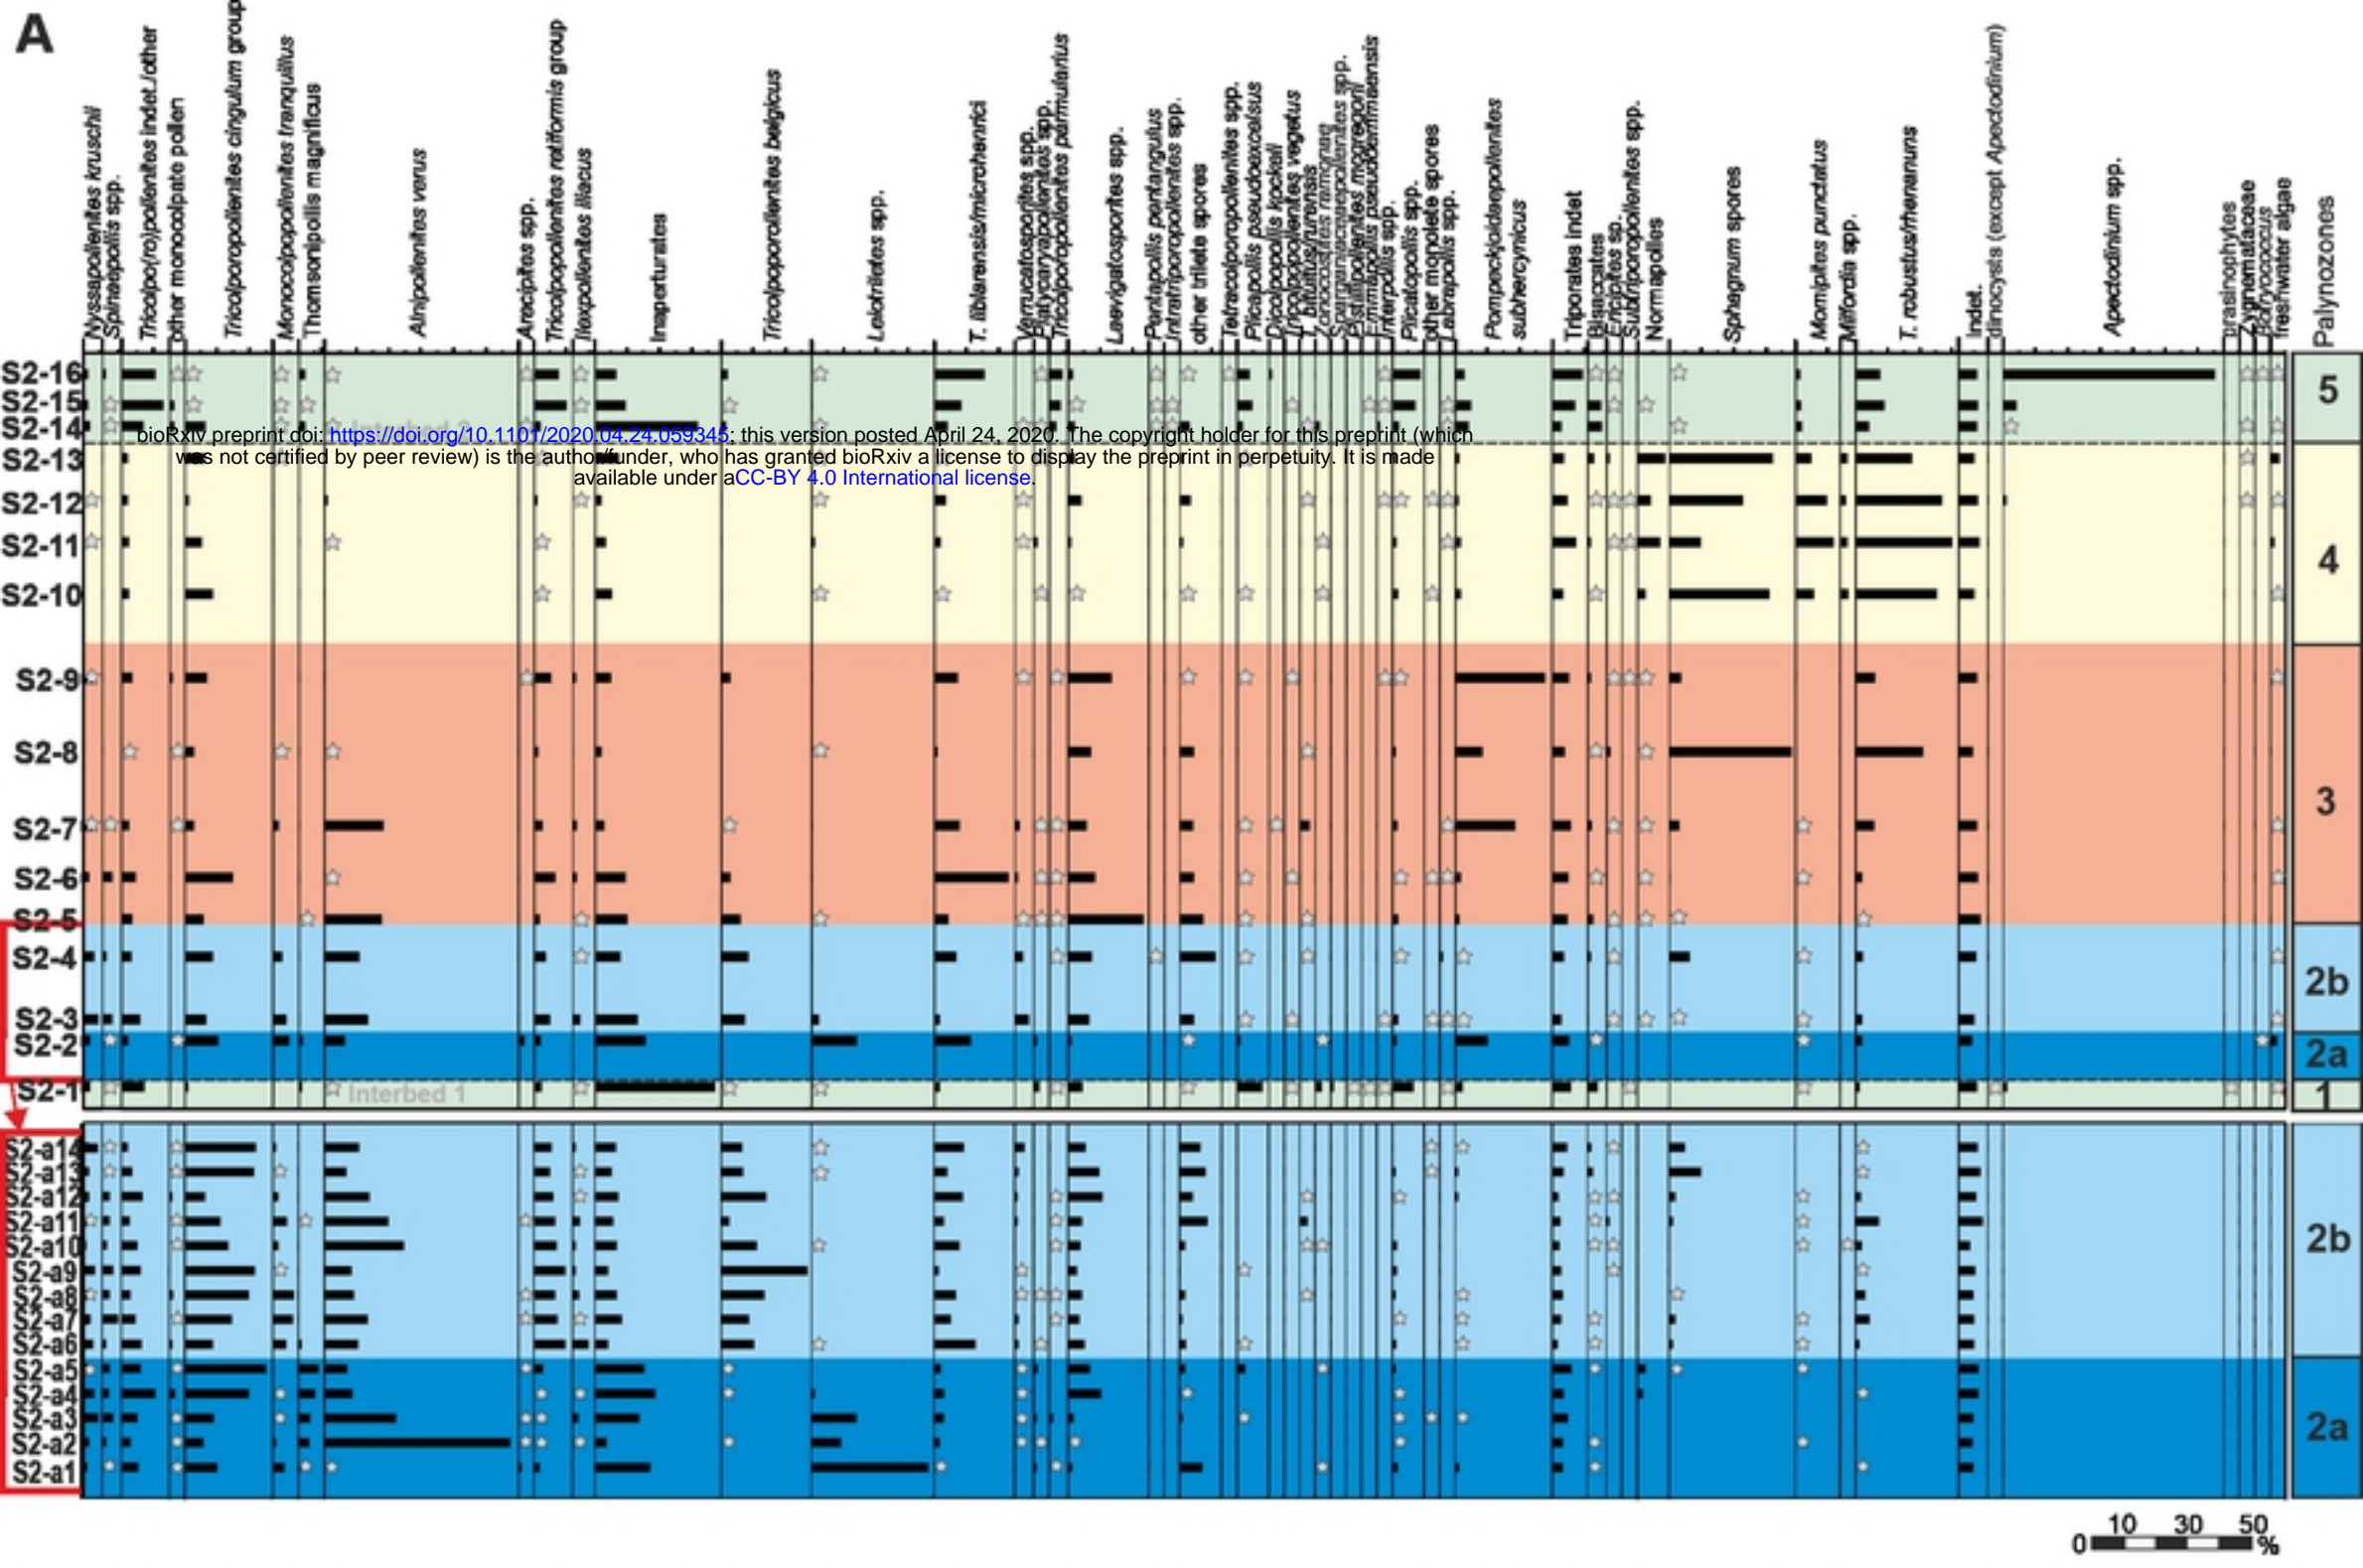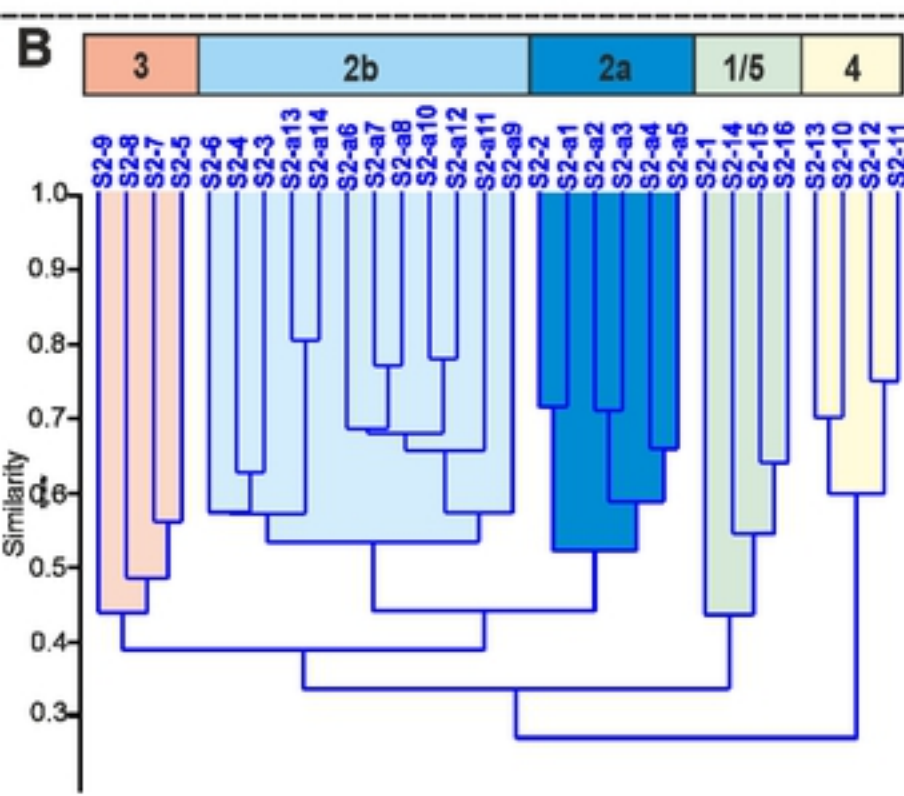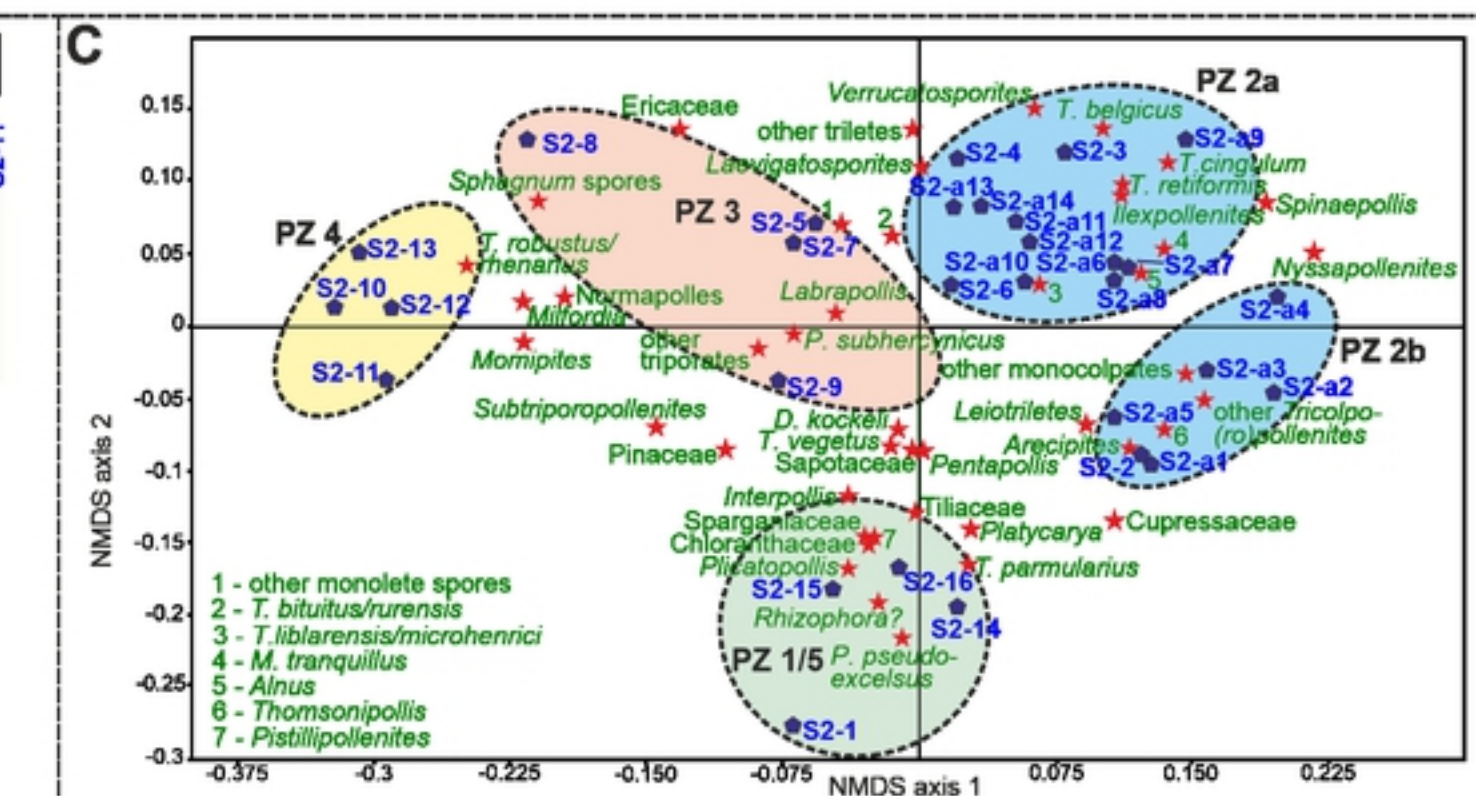

Figure 07

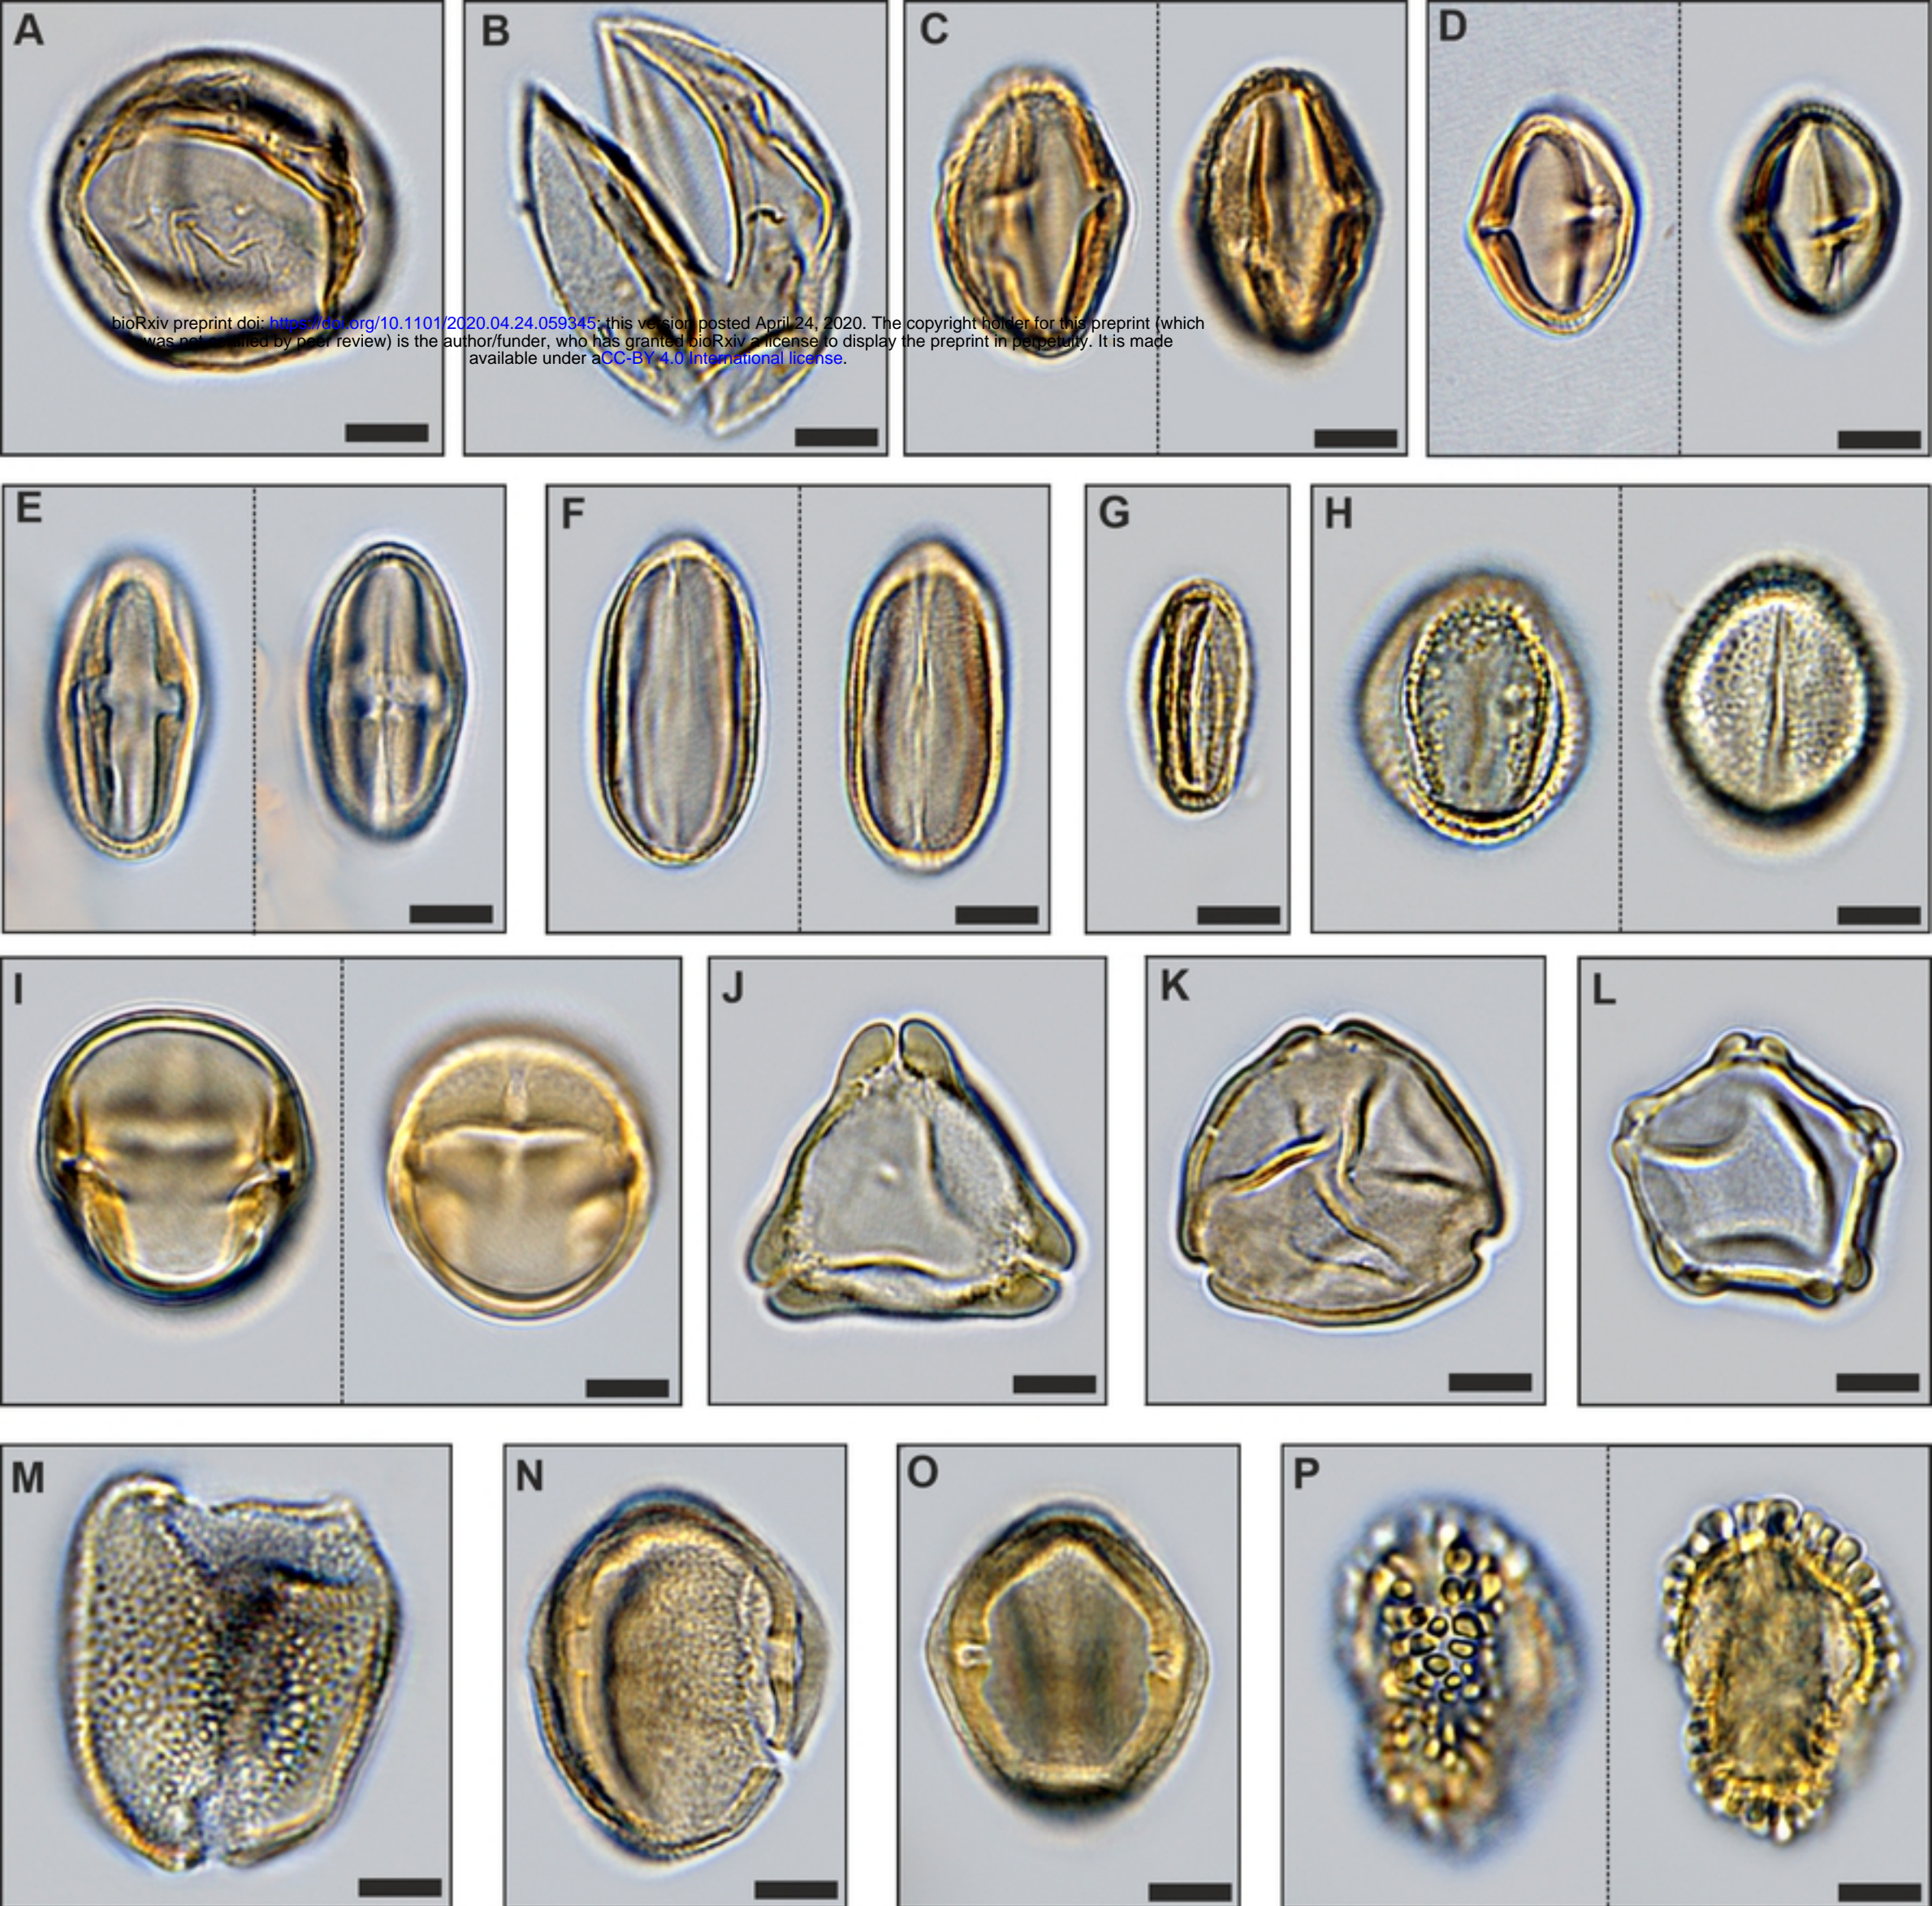

Figure 08

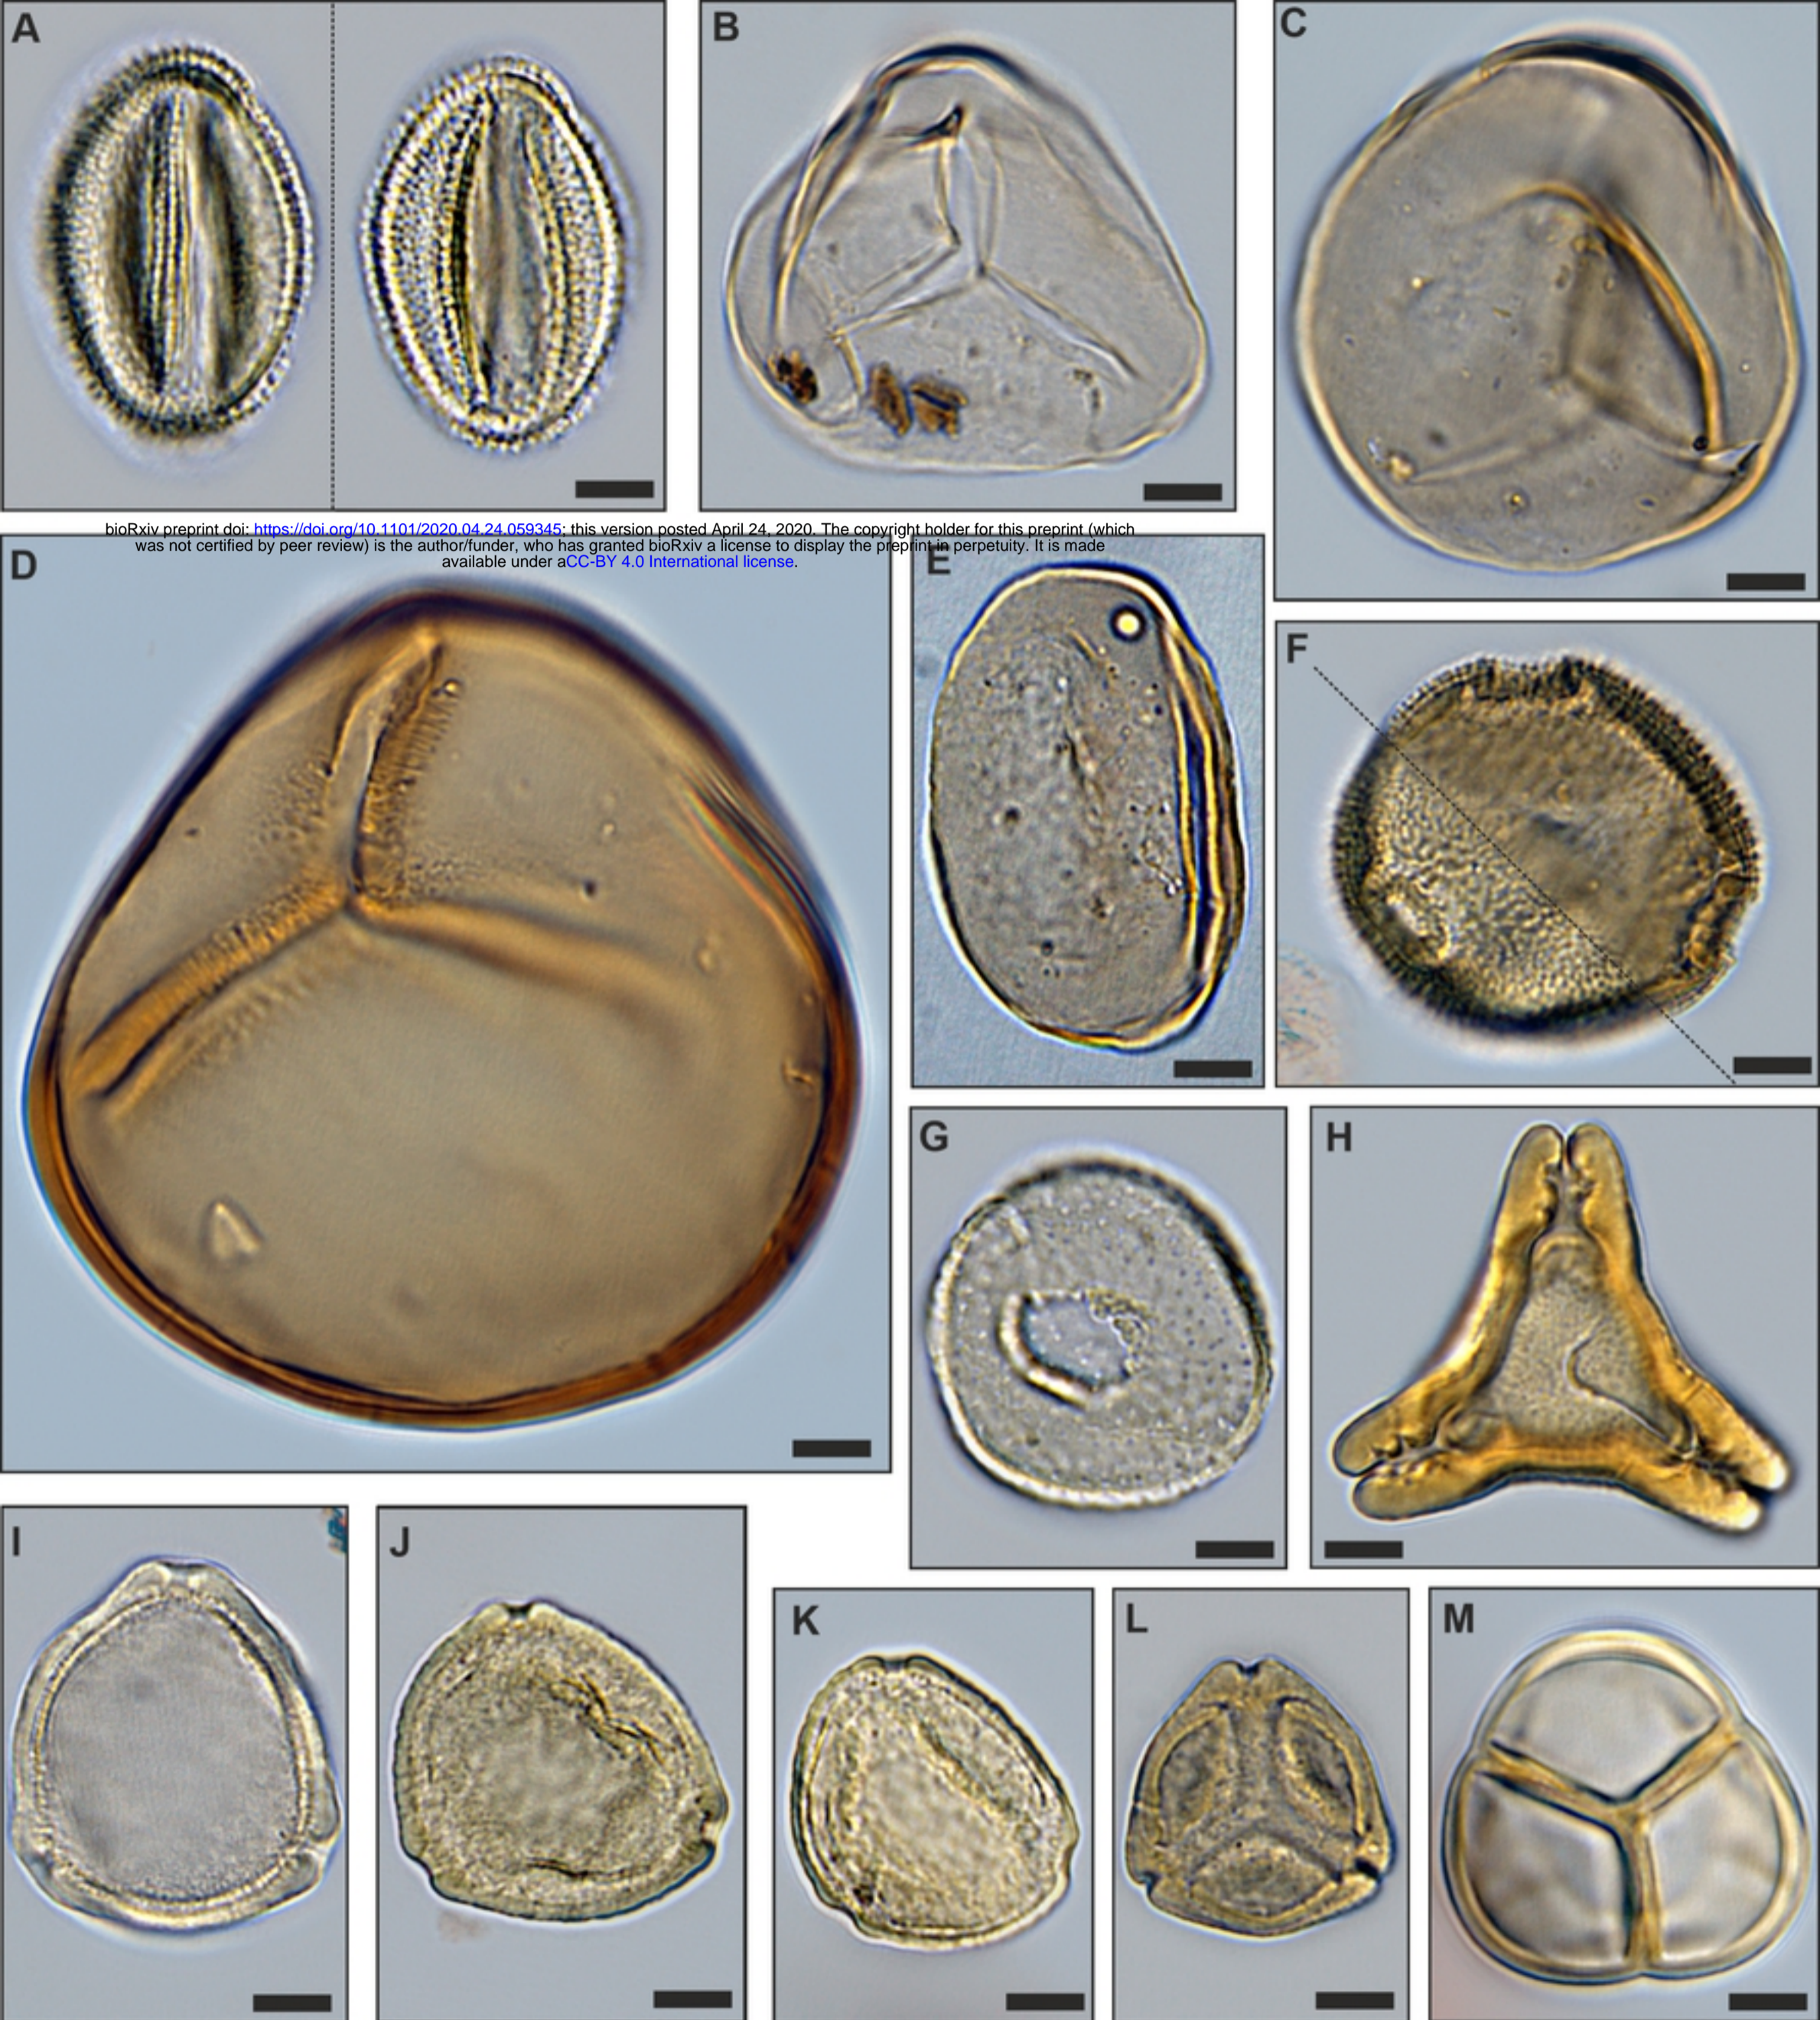

Figure 09

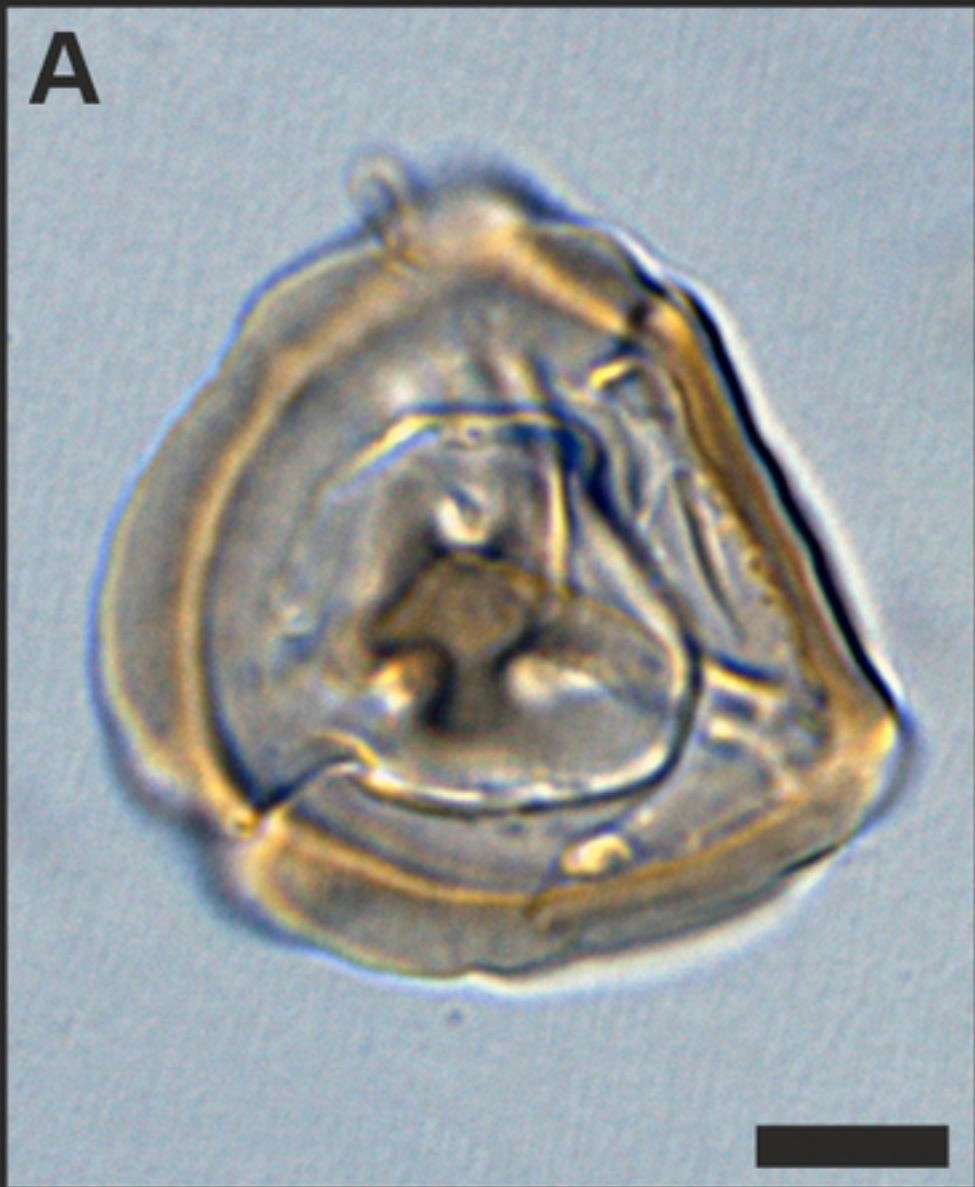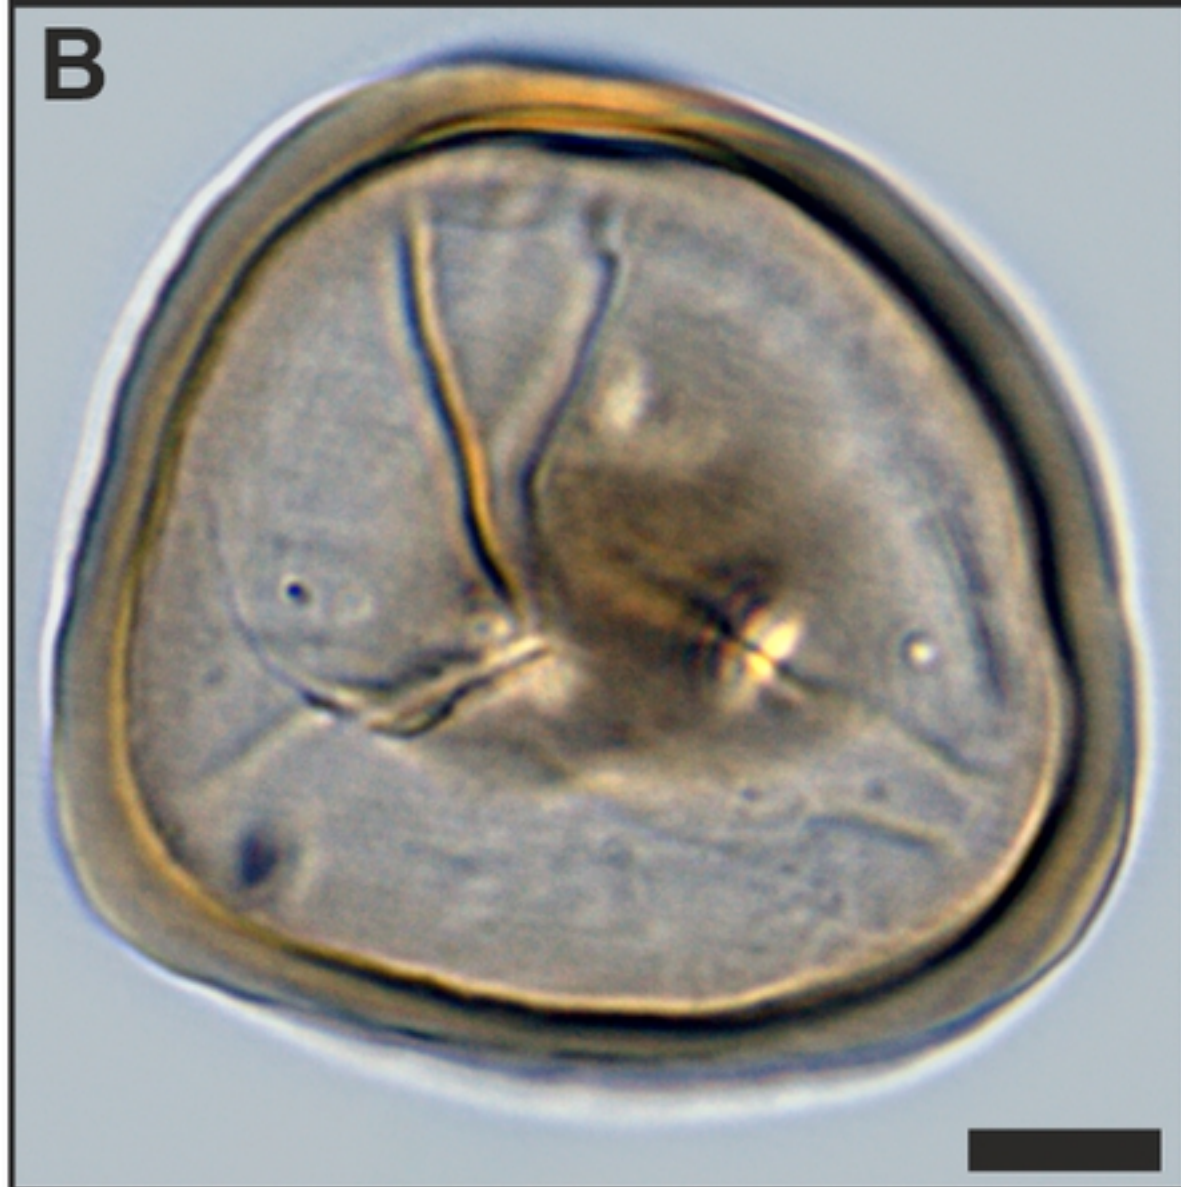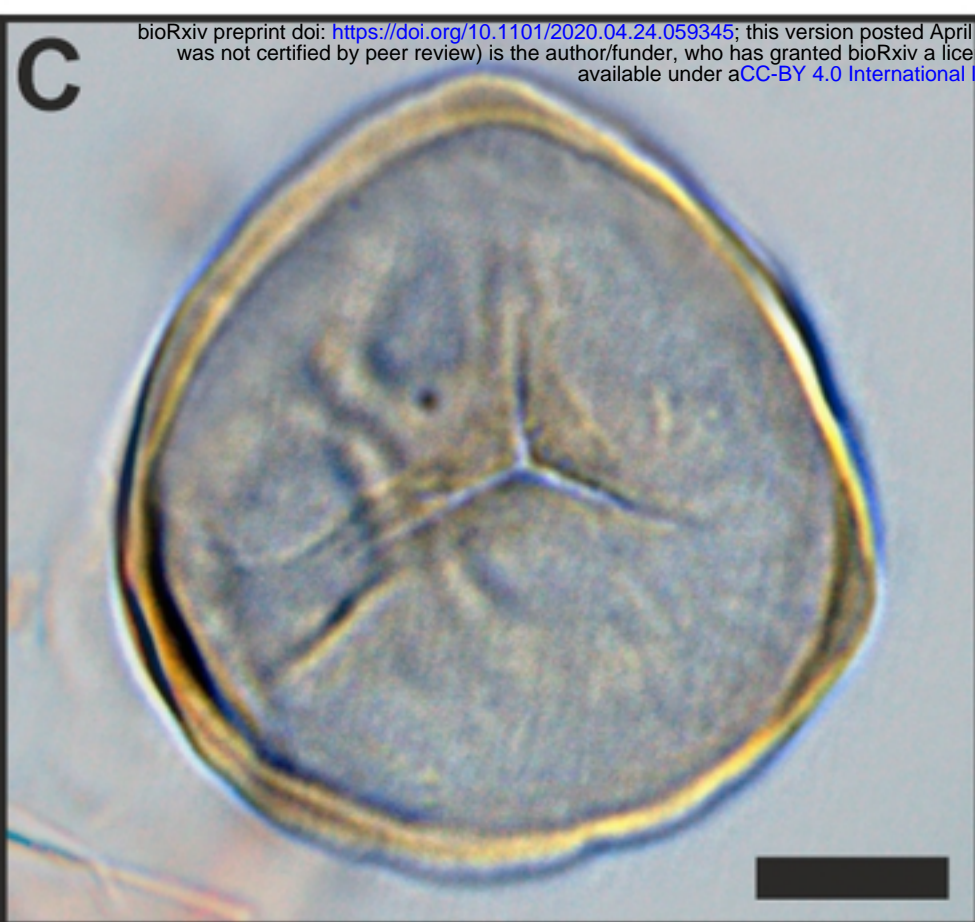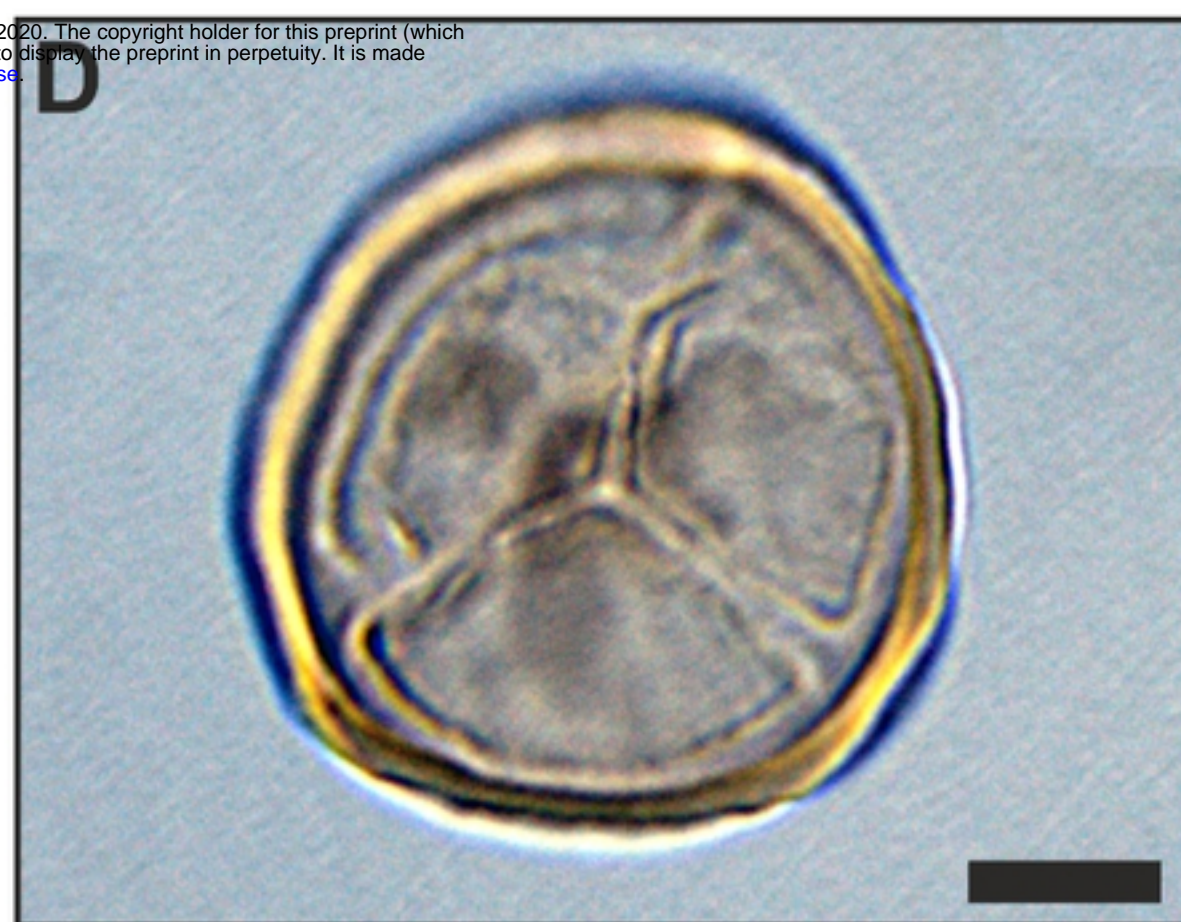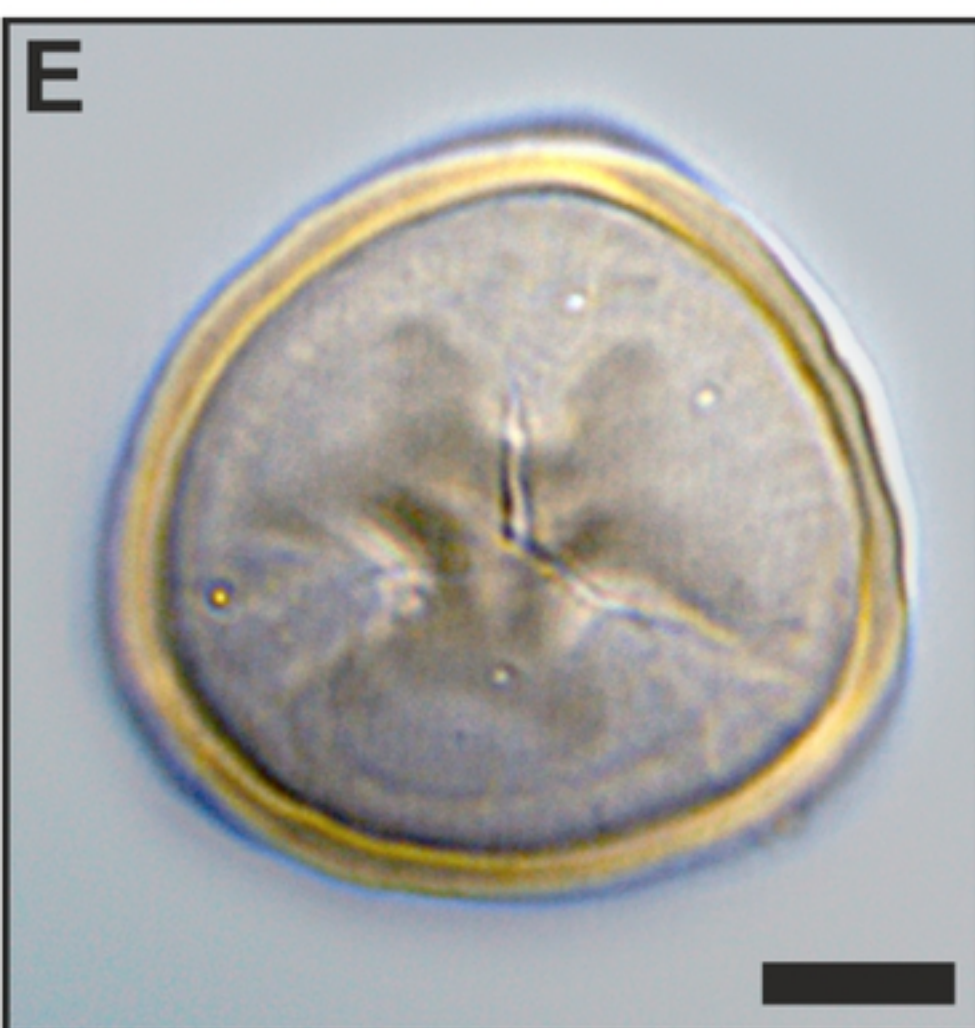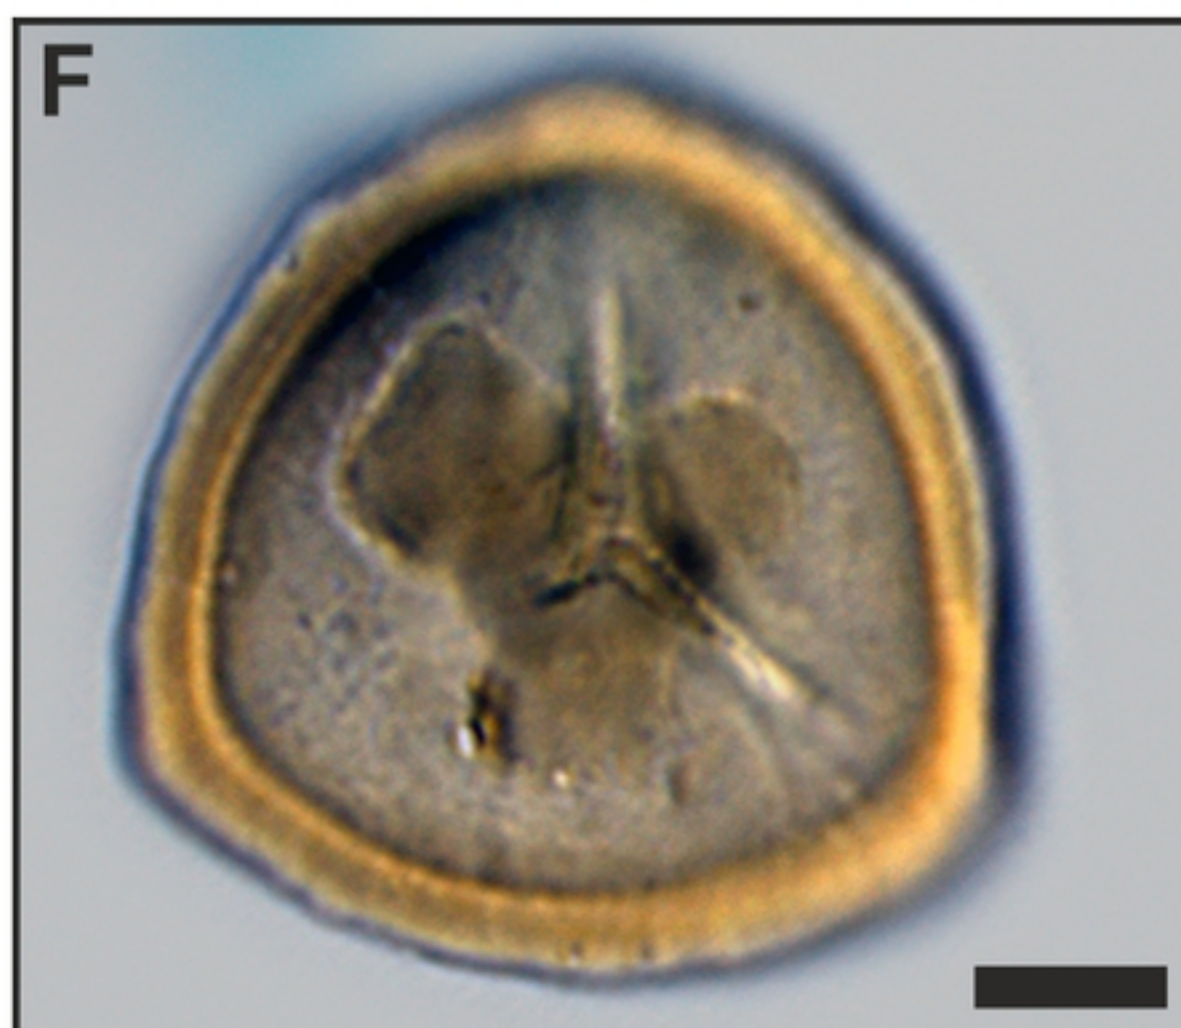

bioRxiv preprint doi: <https://doi.org/10.1101/2020.04.24.059345>; this version posted April 24, 2020. The copyright holder for this preprint (which was not certified by peer review) is the author/funder, who has granted bioRxiv a license to display the preprint in perpetuity. It is made available under aCC-BY 4.0 International license.

Figure 10

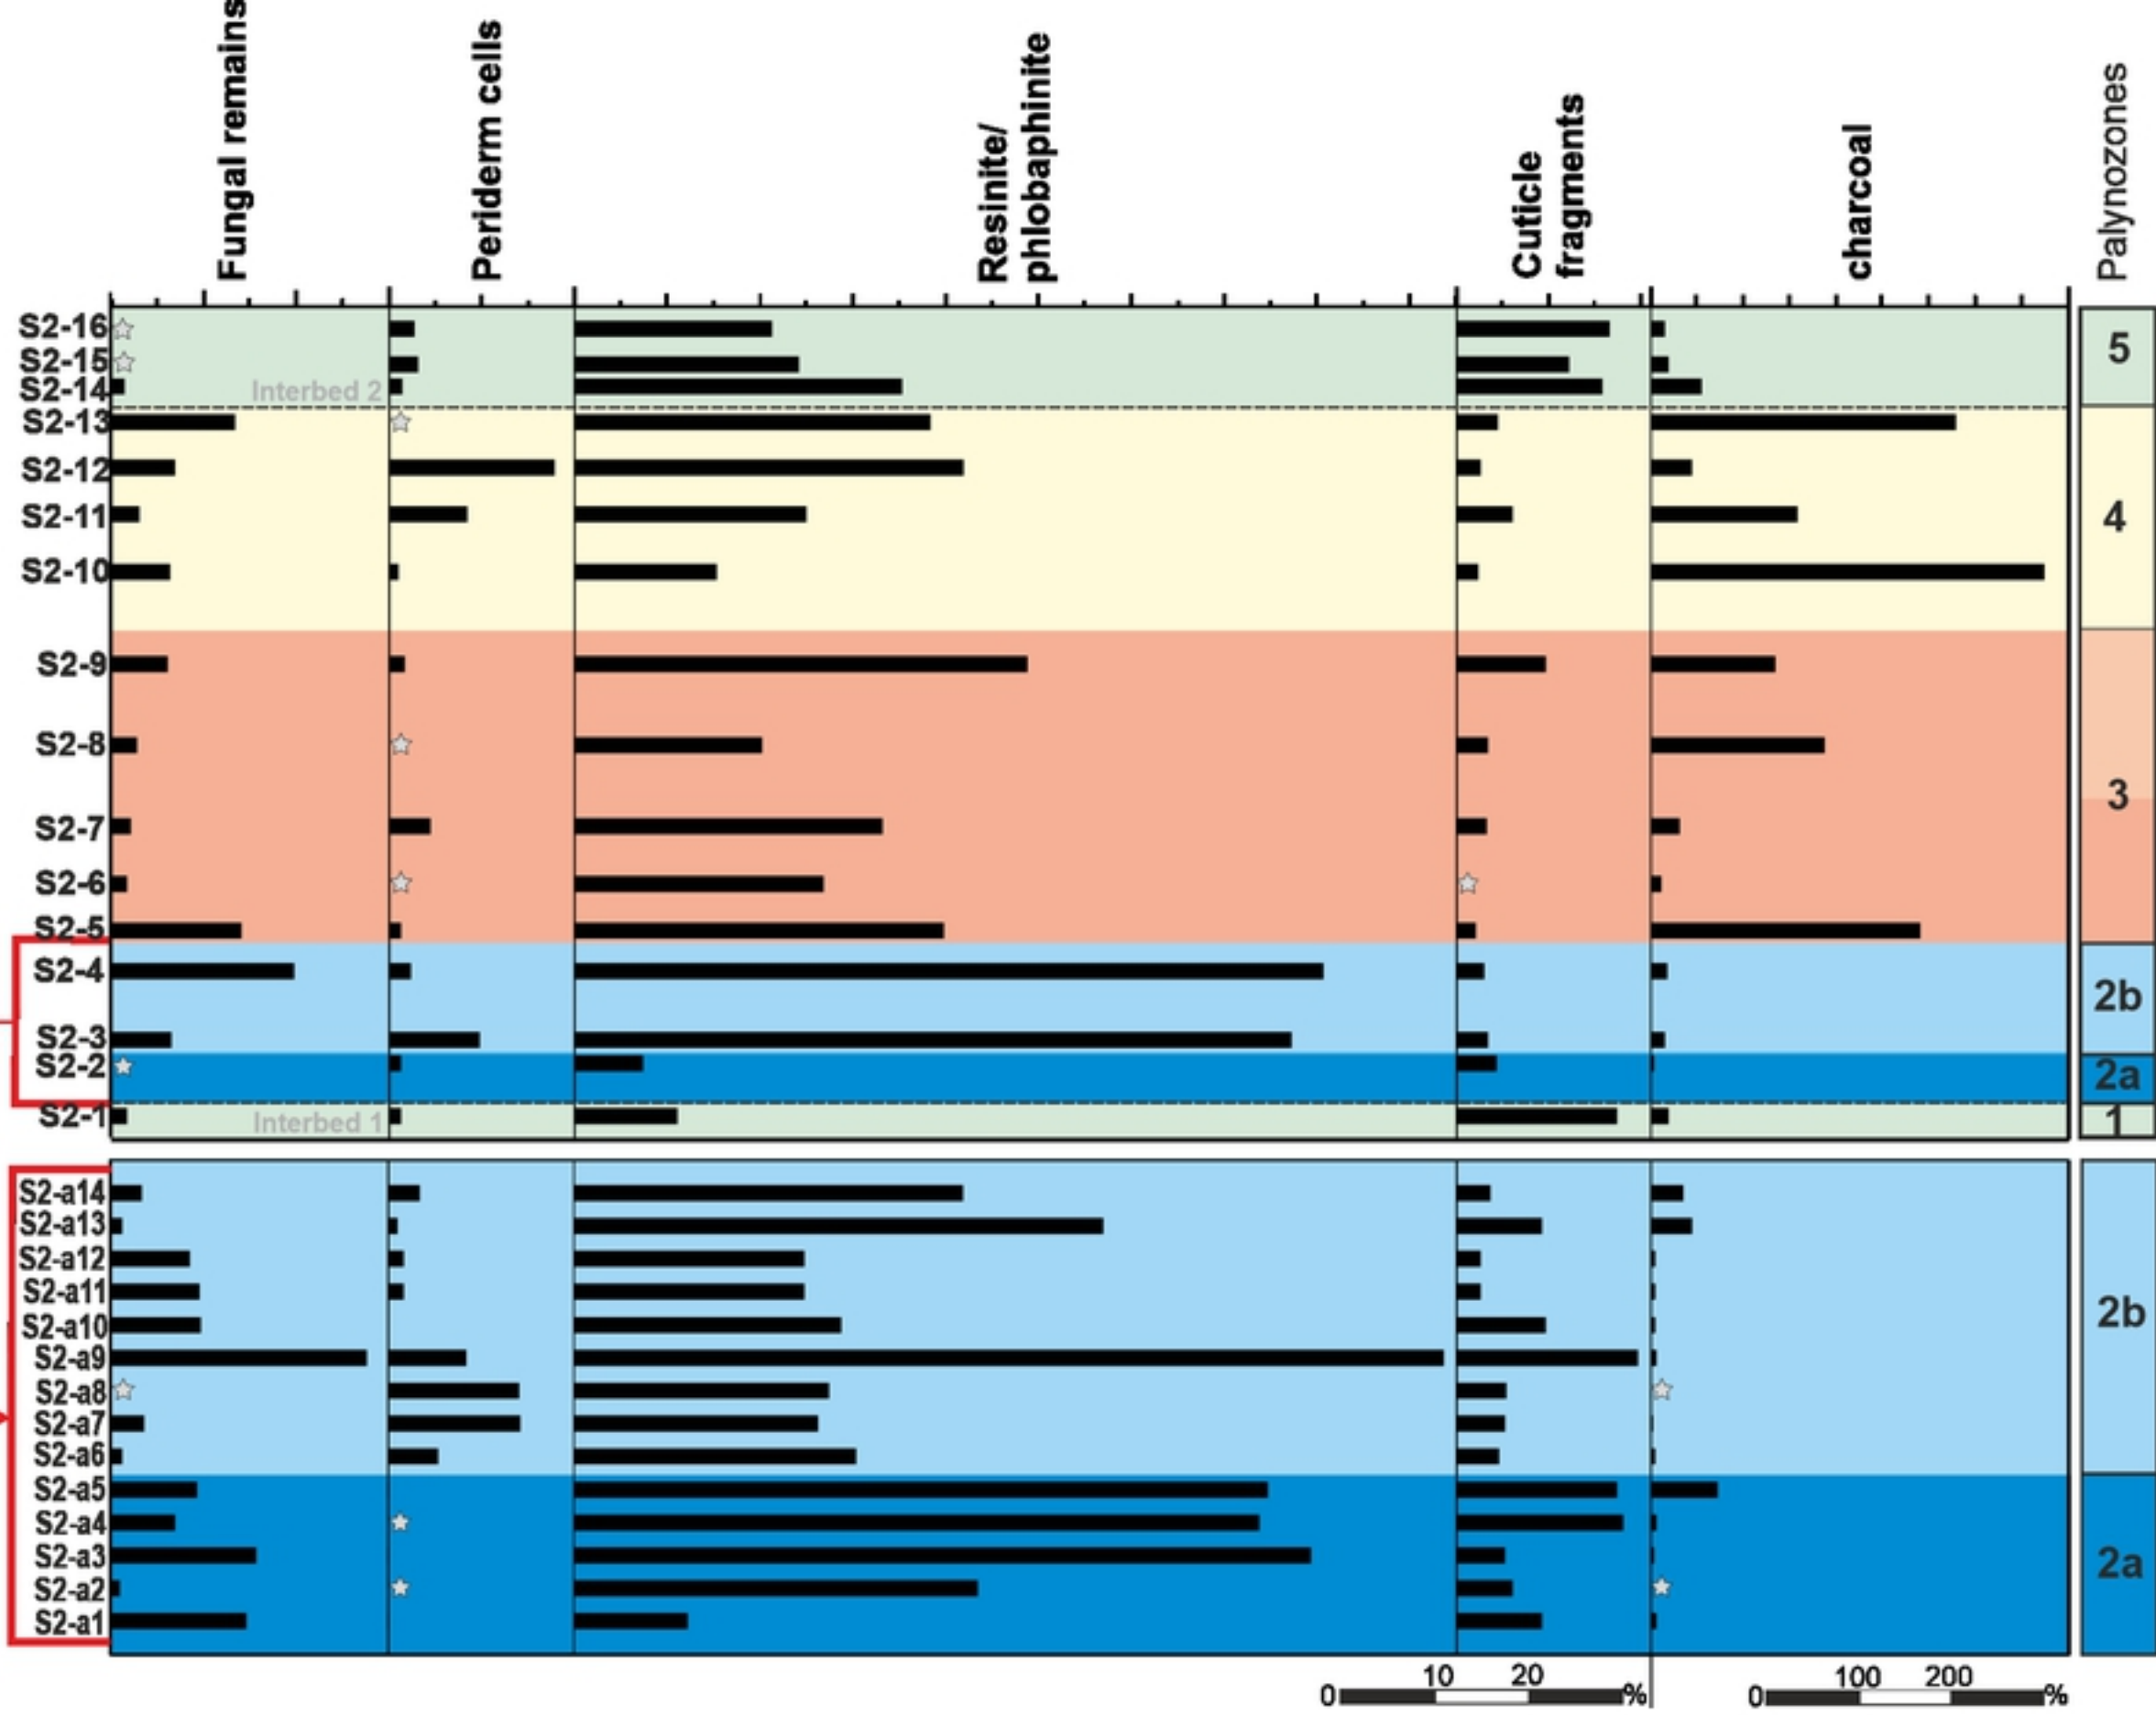

Figure 11

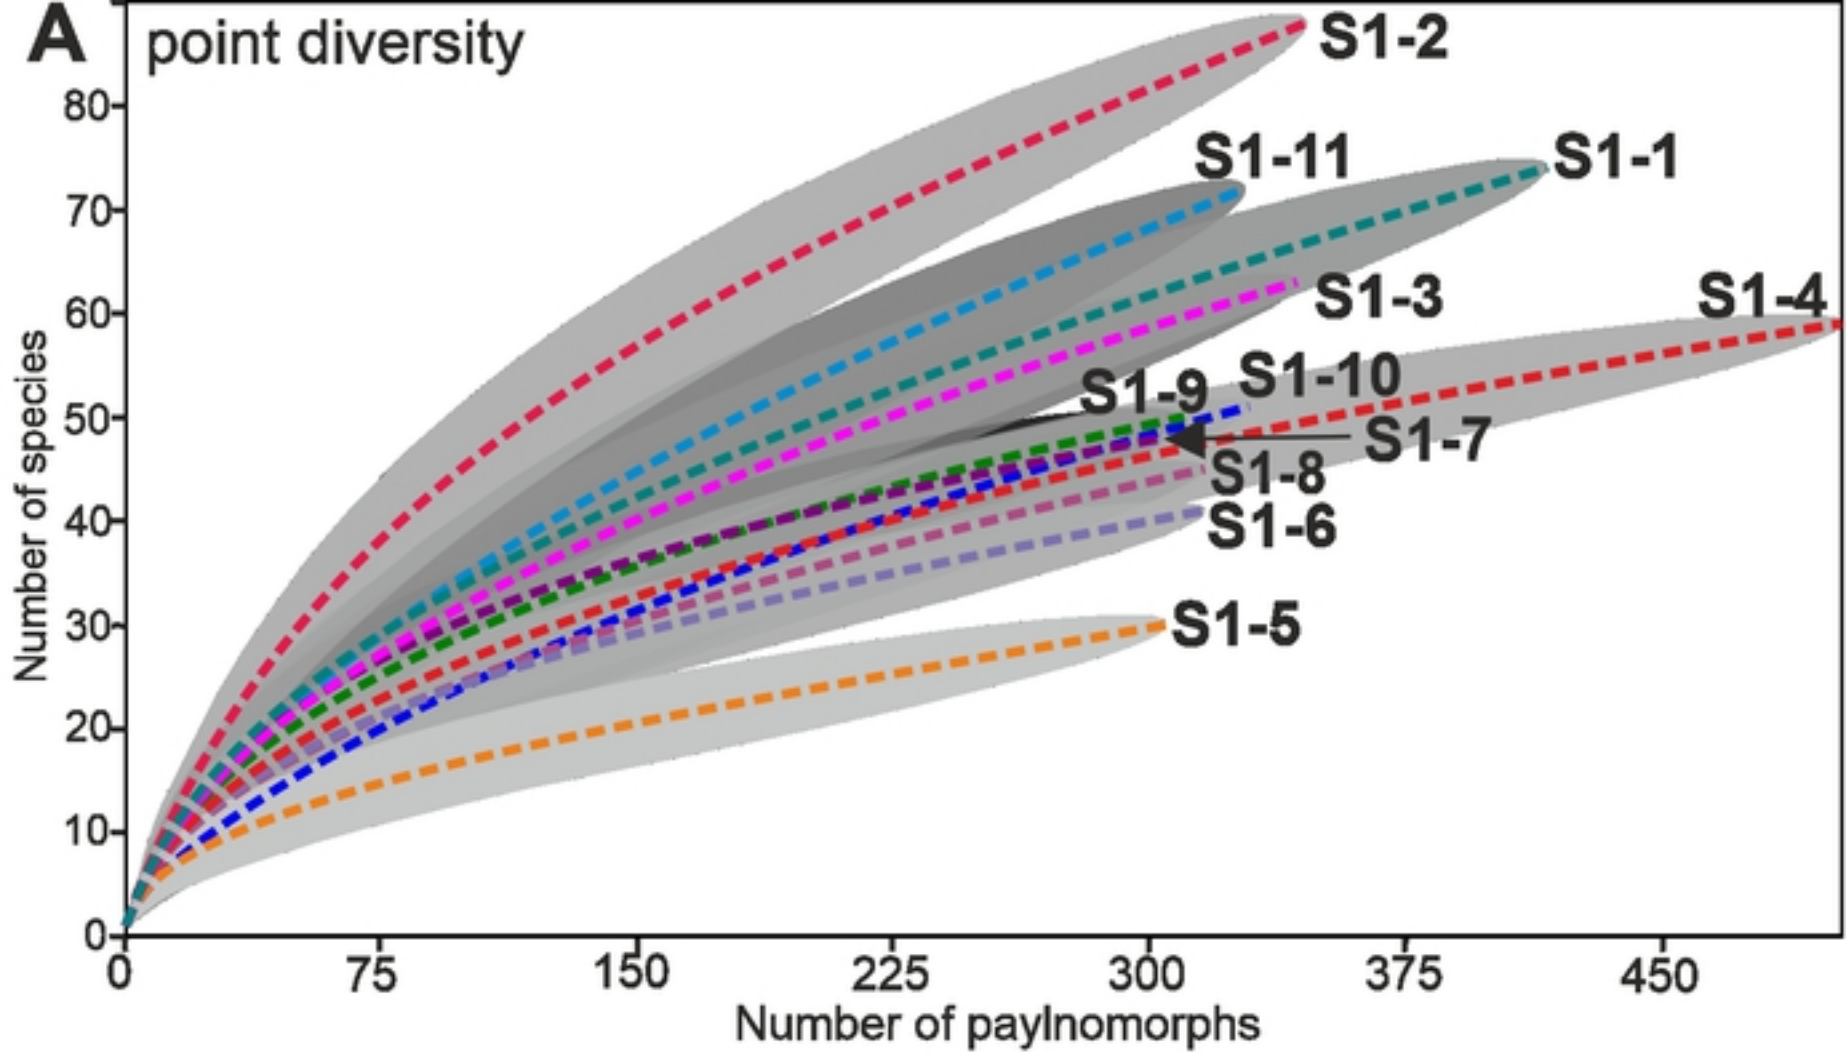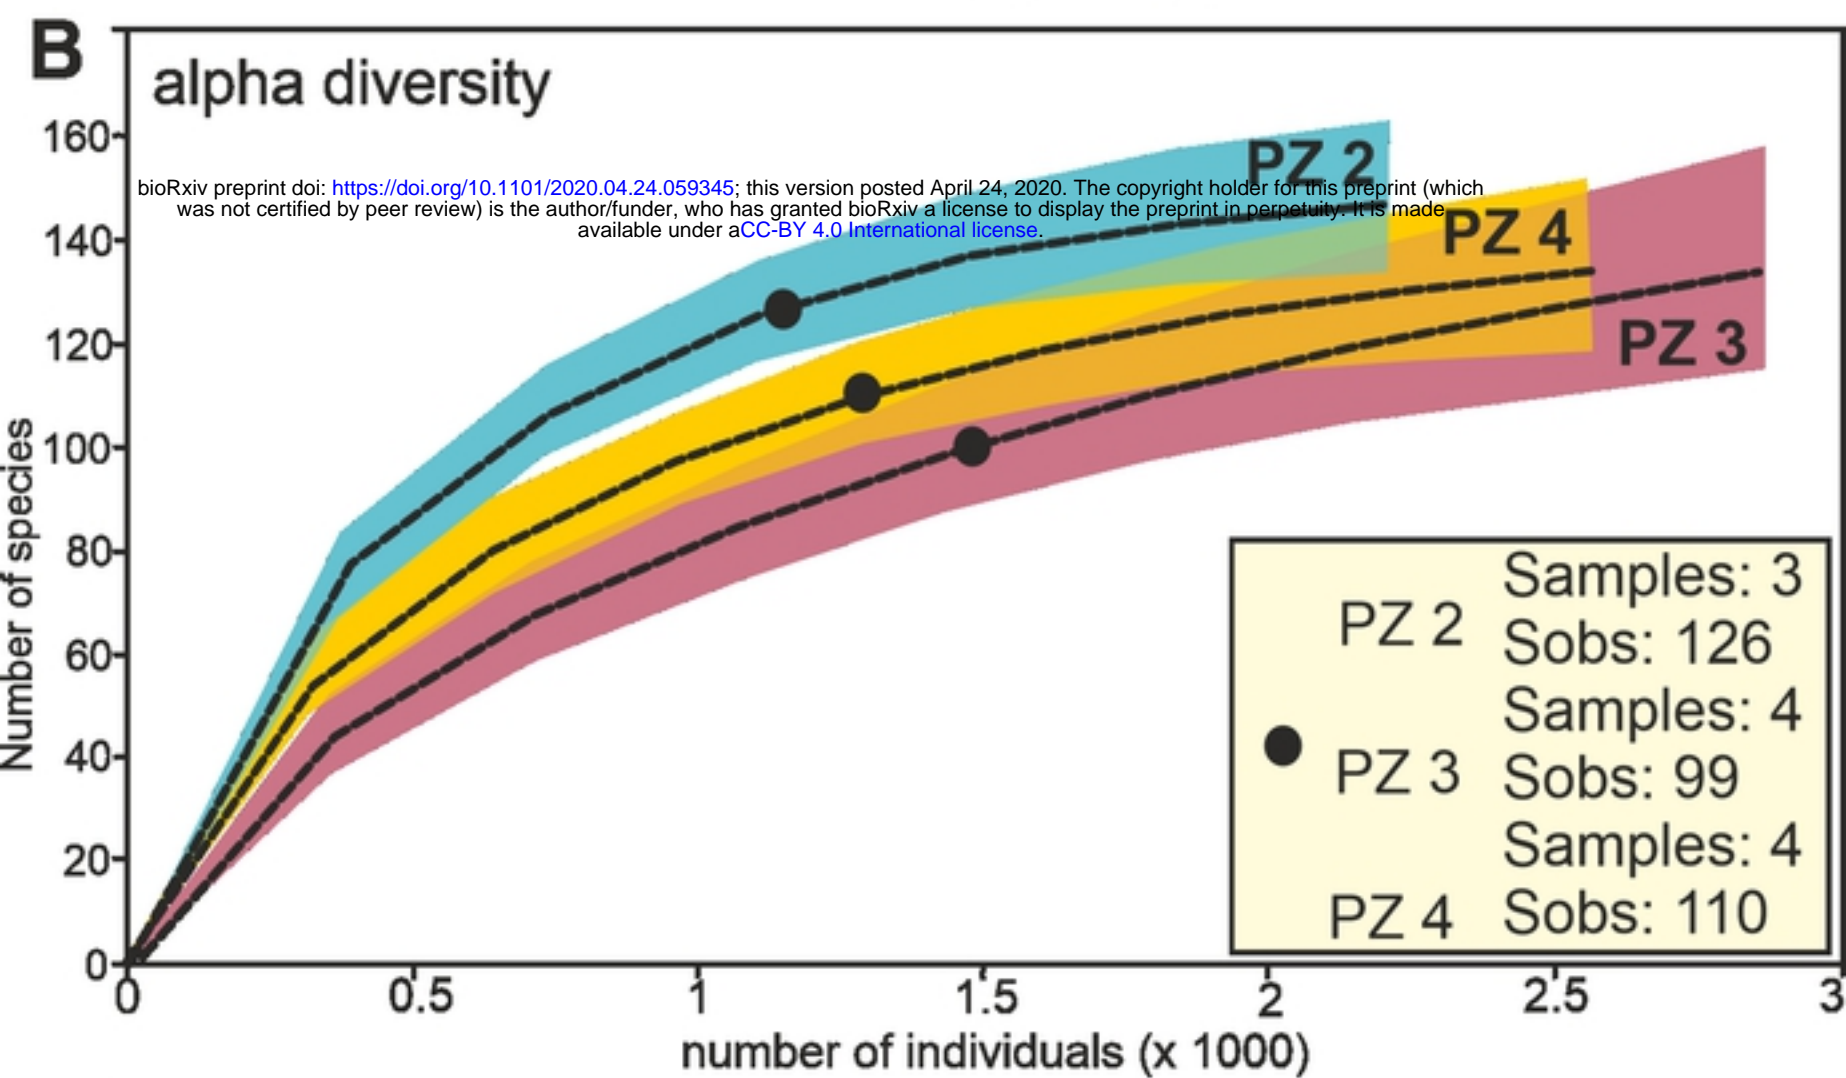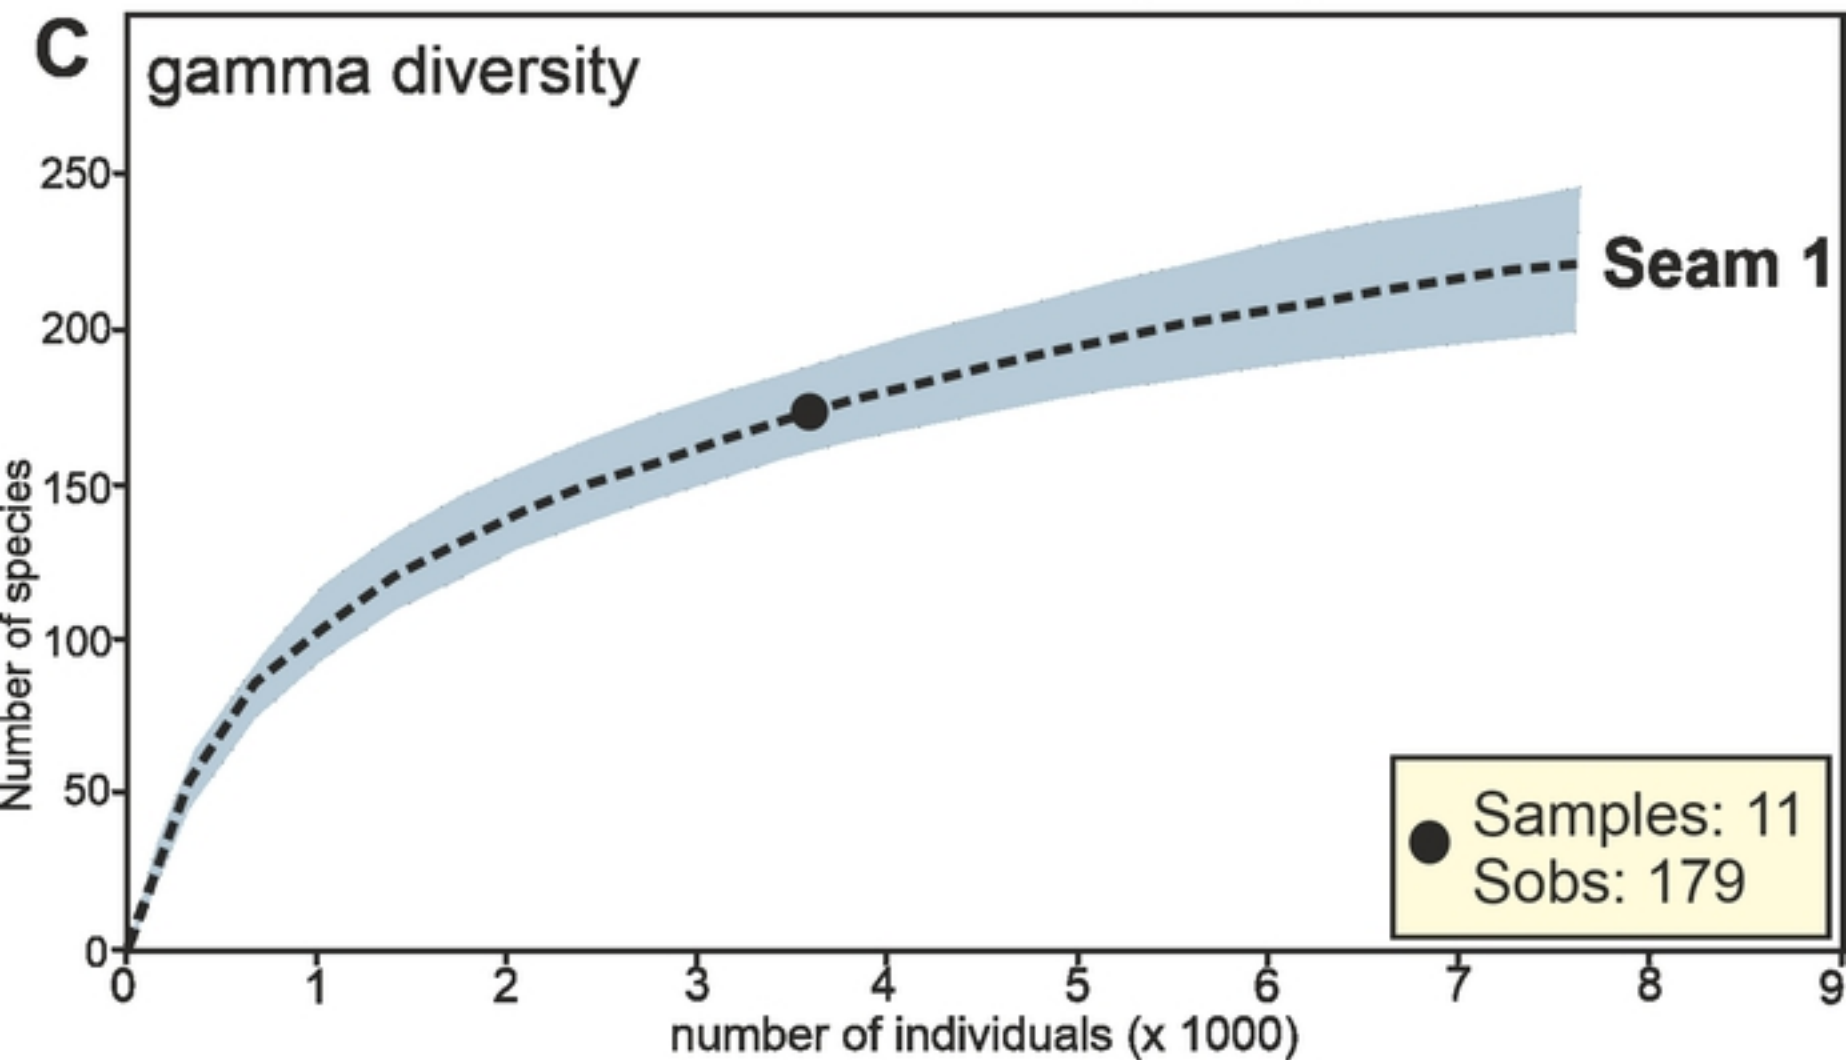

Figure 12



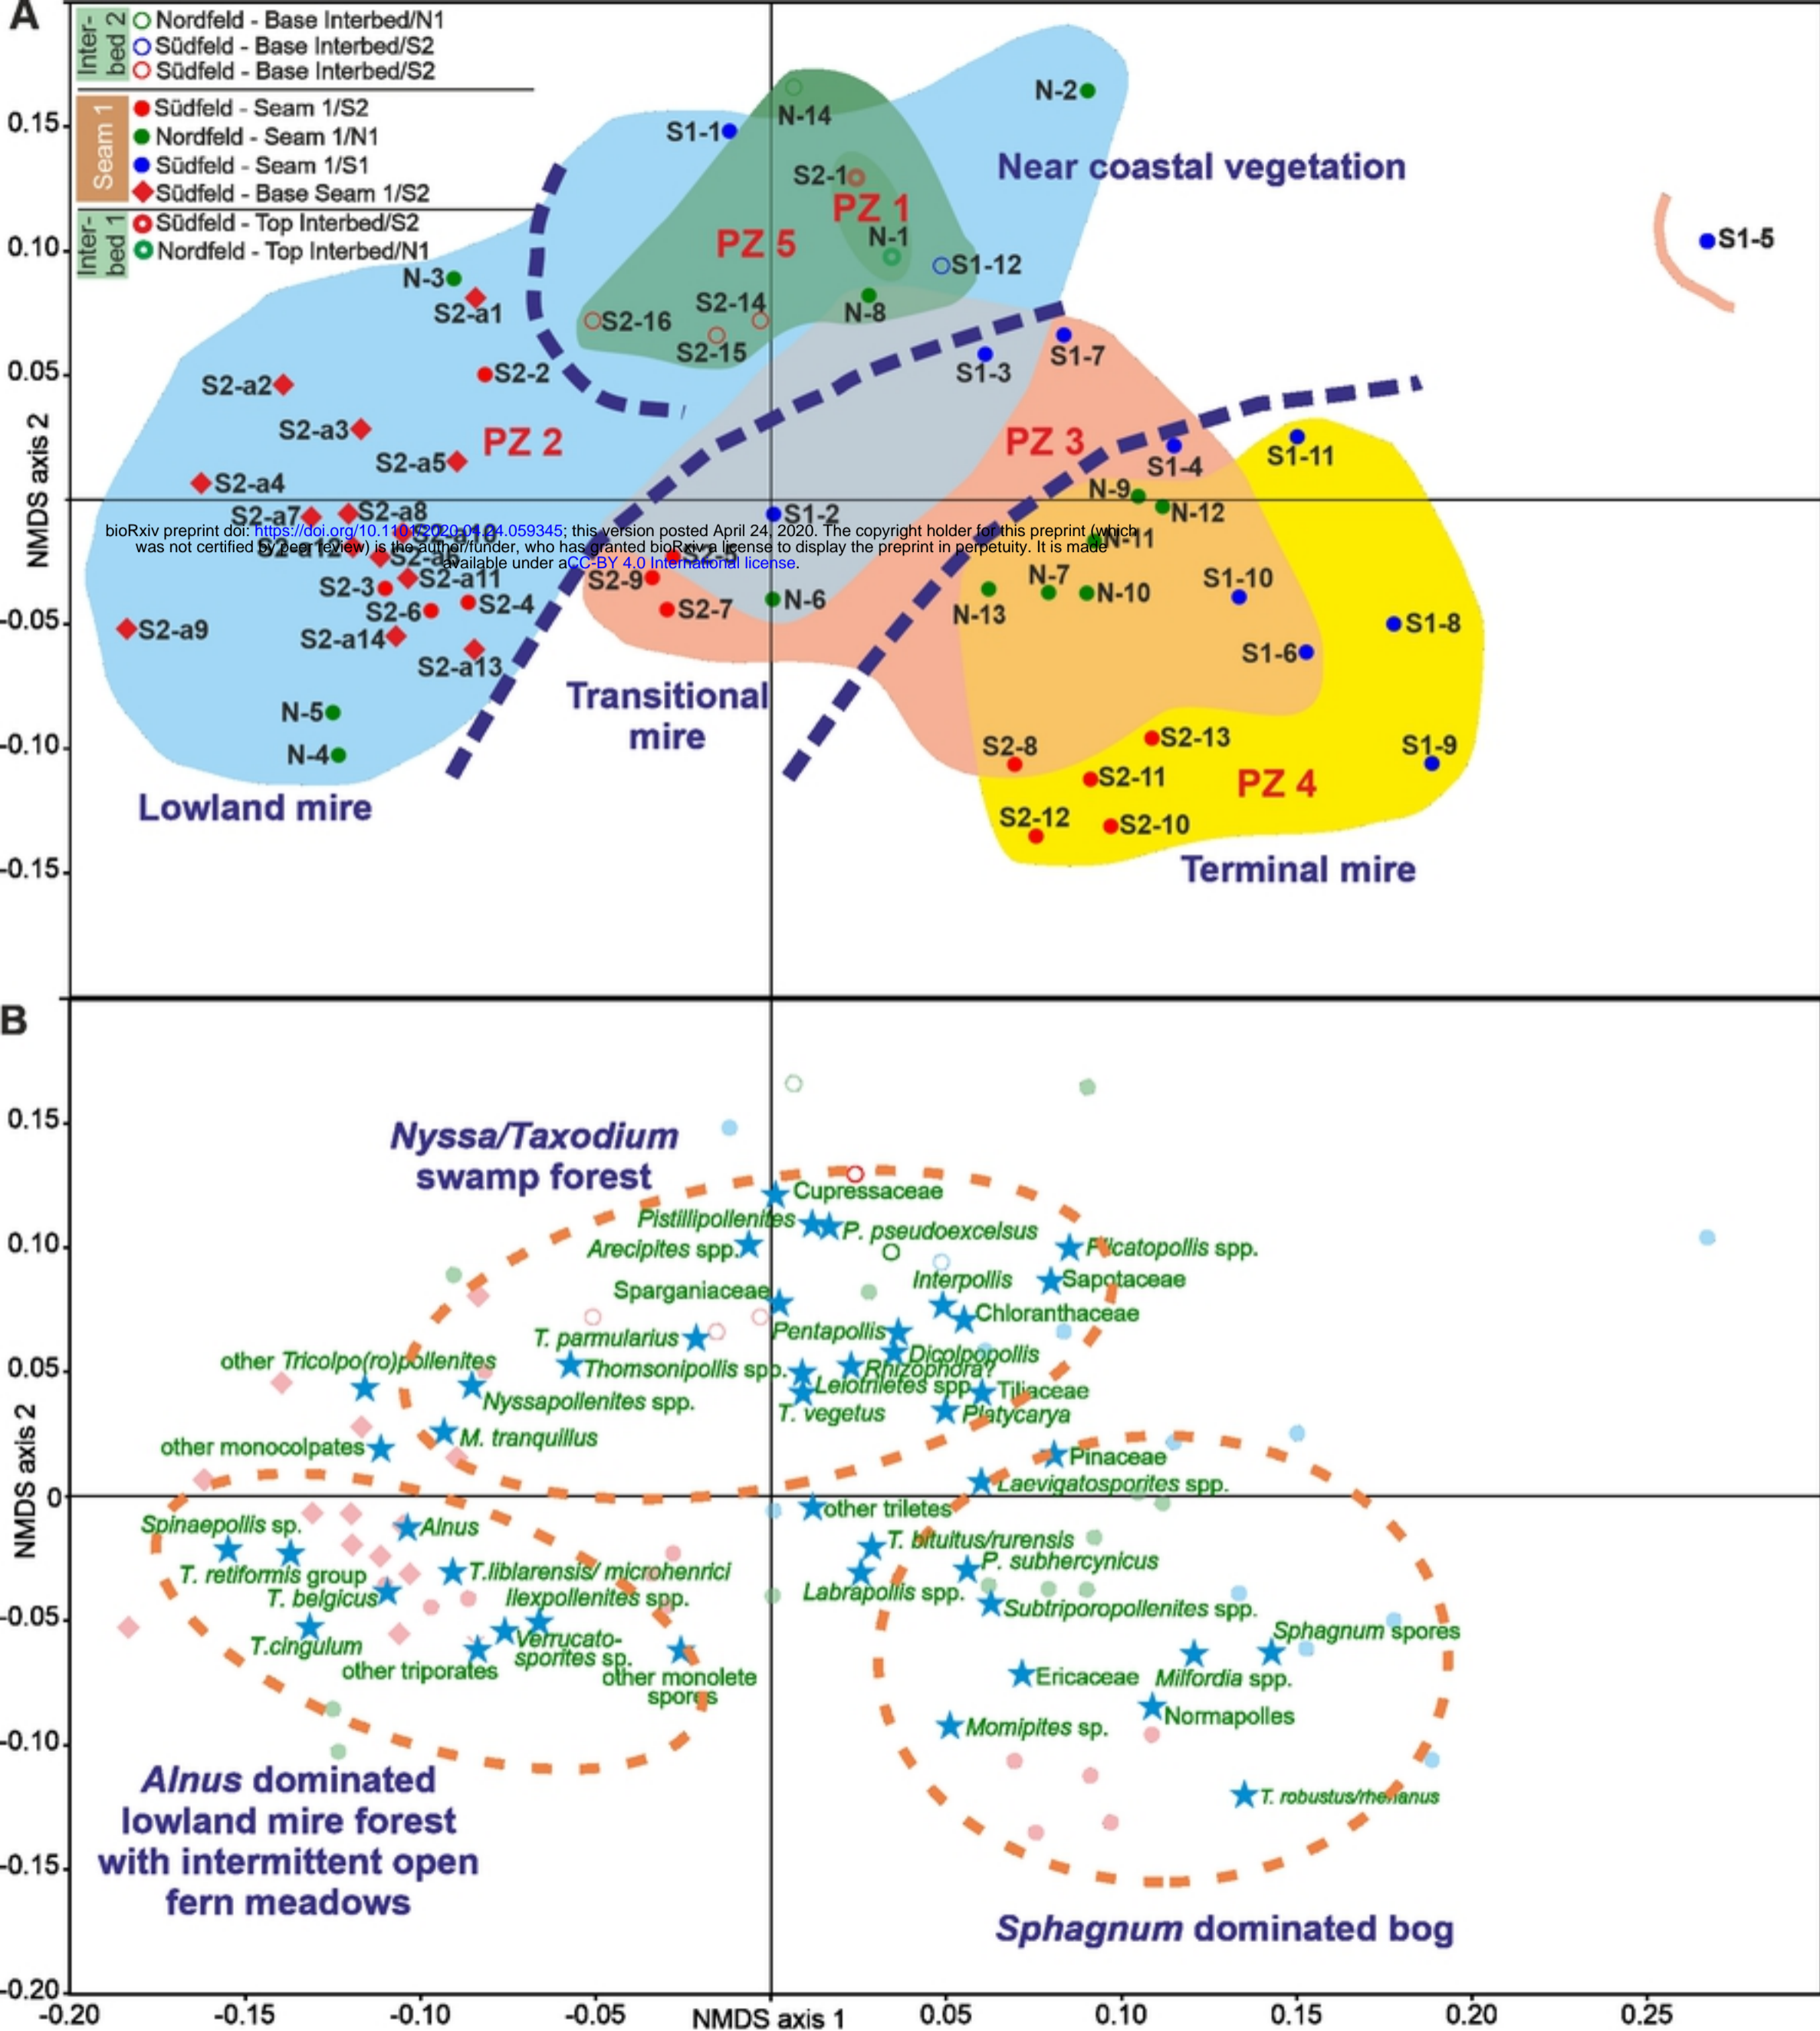

Figure 13

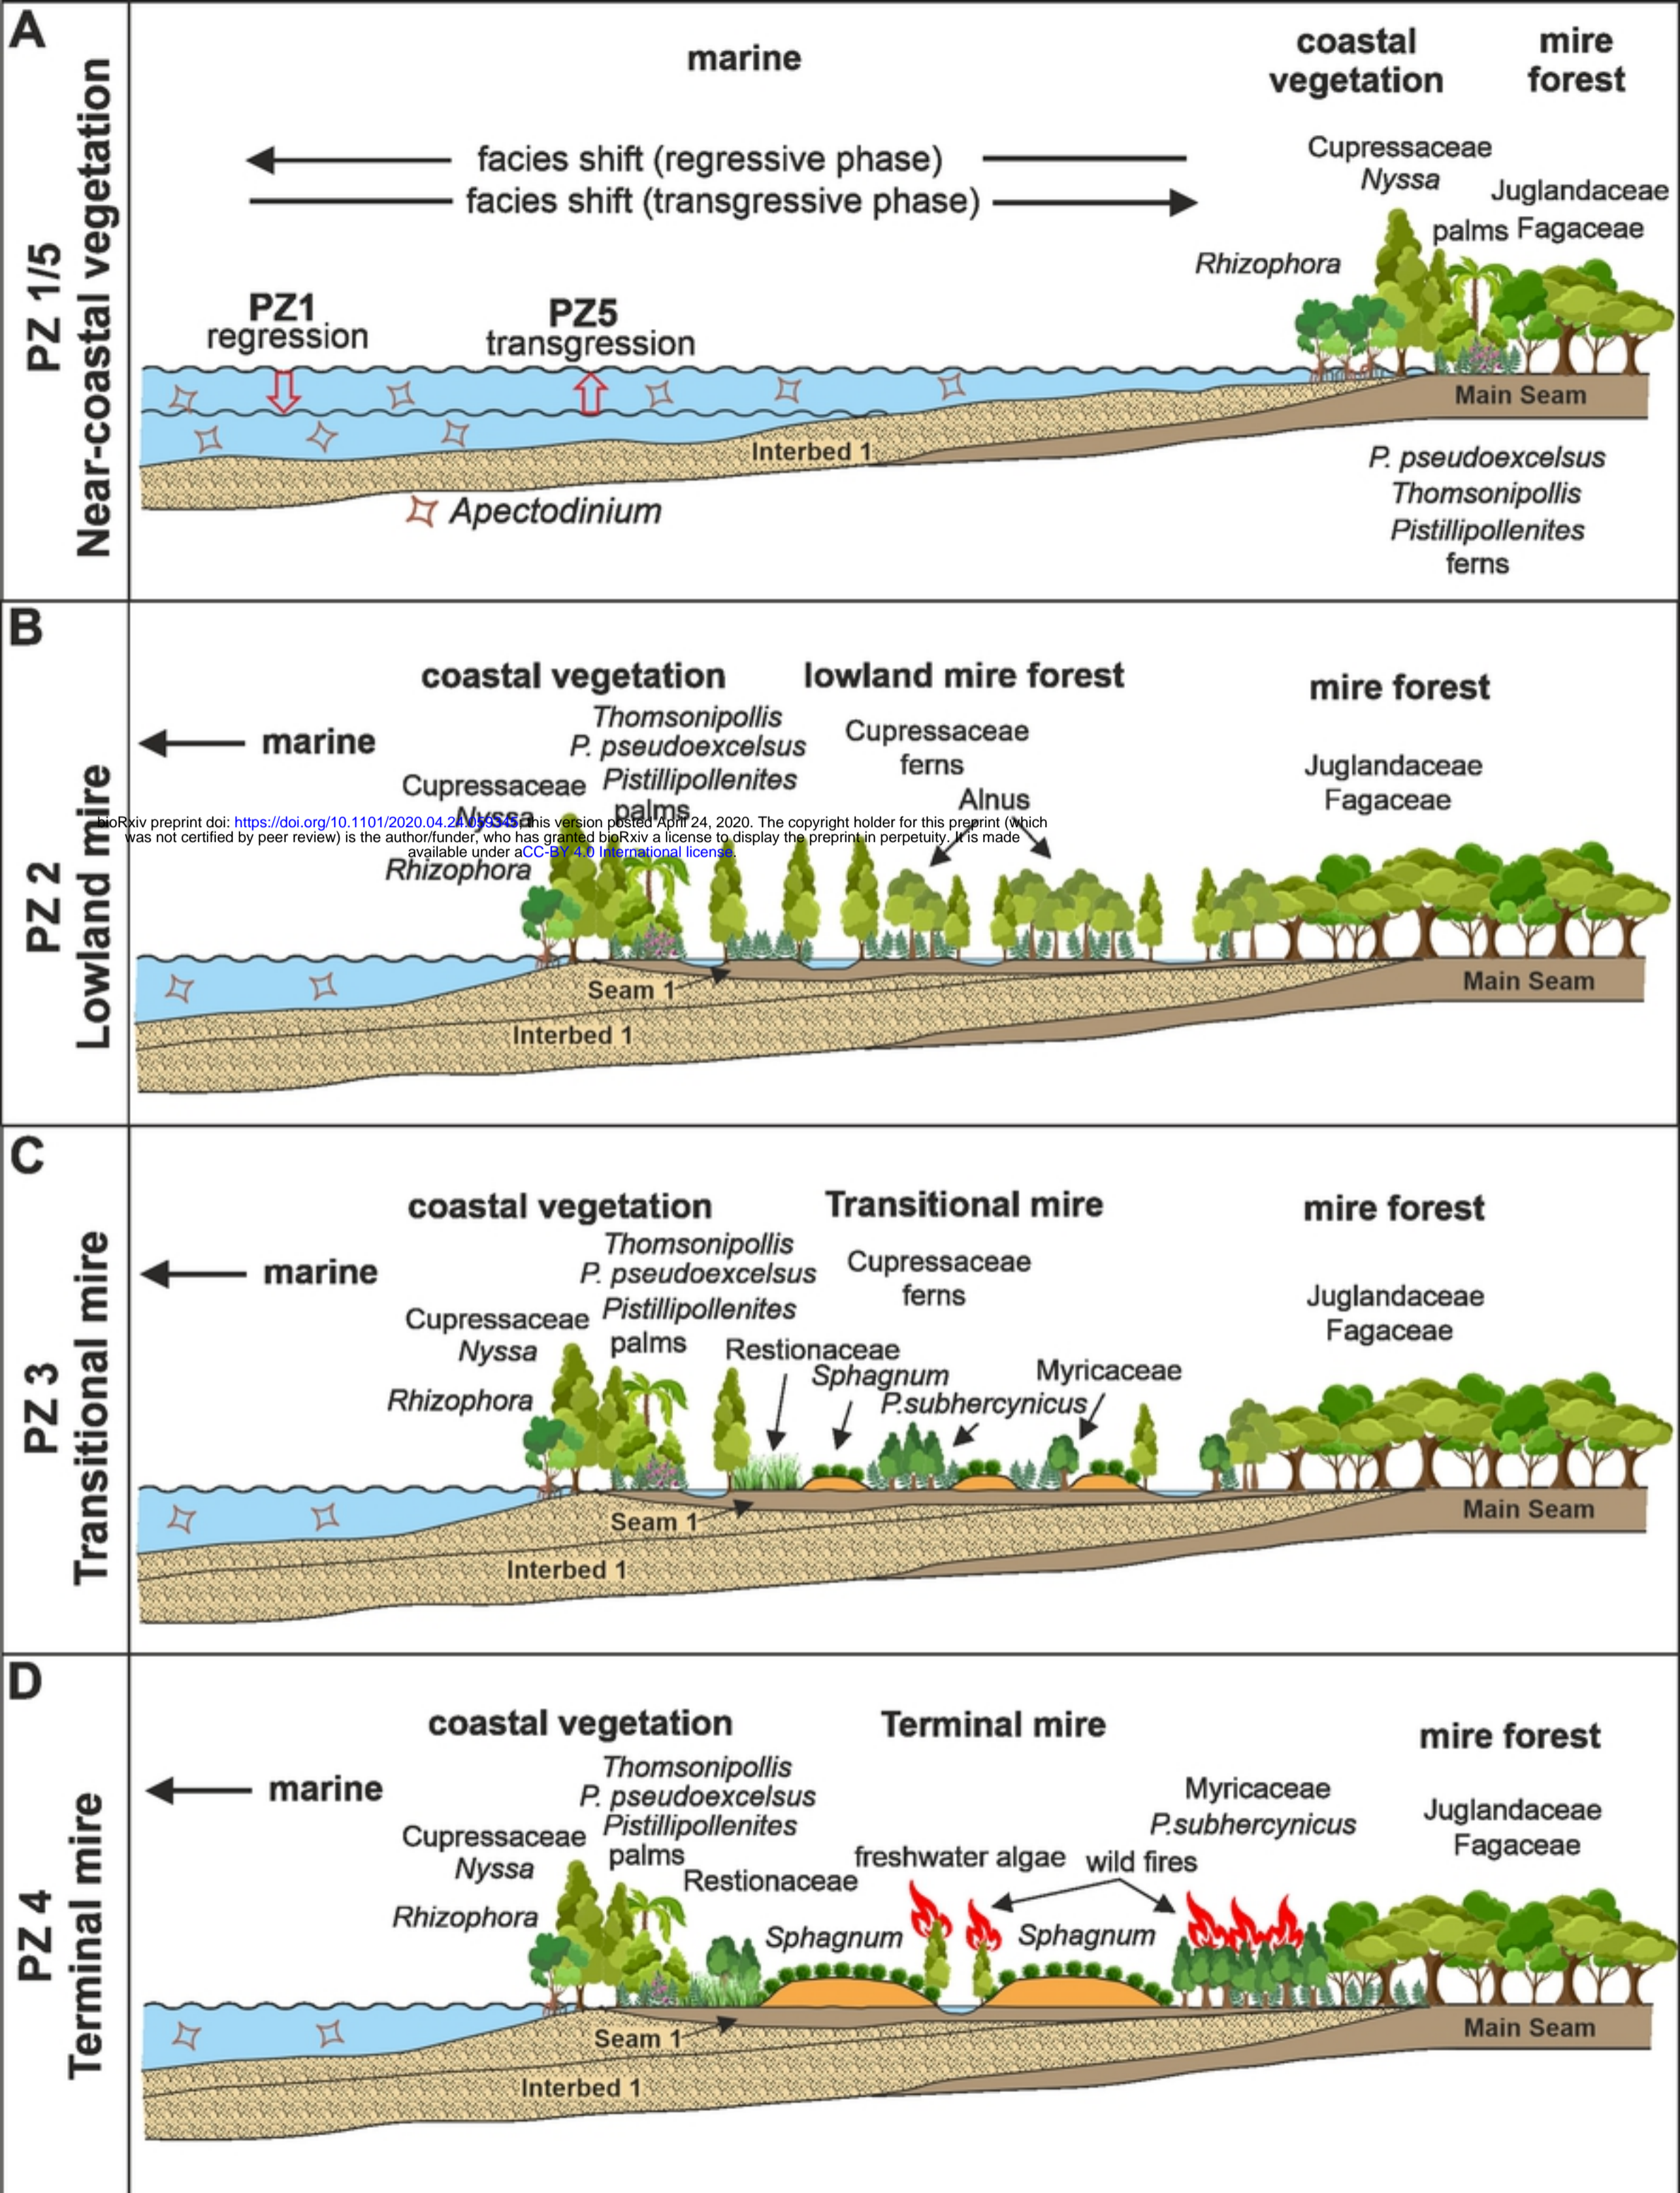

Figure 14
