# 1 **Greenhouse conditions in lower Eocene coastal wetlands? –** 2 **Lessons from Schöningen, Northern Germany**

3 Olaf K. Lenz<sup>1\*</sup>, Walter Riegel<sup>2</sup>, Volker Wilde<sup>2</sup>,

4 <sup>1</sup>General Directorate, Senckenberg Society for Nature Research, Frankfurt am Main, Germany.

5 <sup>2</sup>Department Palaeontology and Historical Geology, Senckenberg Research Institute and Natural  
6 History Museum, Frankfurt am Main, Germany.

7

8 \*Corresponding author

9 E-mail: [olaf.lenz@senckenberg.de](mailto:olaf.lenz@senckenberg.de) (OL)

10

## 11 **Author contributions**

12 Conceptualization: Olaf K. Lenz, Walter Riegel, Volker Wilde

13 Data Curation: Olaf K. Lenz

14 Formal Analysis: Olaf K. Lenz

15 Funding Acquisition: Olaf K. Lenz

16 Investigation: Olaf K. Lenz, Walter Riegel, Volker Wilde

17 Methodology: Olaf K. Lenz, Walter Riegel, Volker Wilde

18 Project Administration: Olaf K. Lenz, Volker Wilde

19 Resources: Olaf K. Lenz, Walter Riegel, Volker Wilde

- 20 Validation: Olaf K. Lenz
- 21 Visualization: Olaf K. Lenz
- 22 Writing – Original Draft Preparation: Olaf K. Lenz
- 23 Writing – Review & Editing: Walter Riegel, Volker Wilde

## 24 **Abstract**

25 The Paleogene succession of the Helmstedt Lignite Mining District in Northern Germany  
26 includes coastal peat mire records from the latest Paleocene to the middle Eocene at the southern  
27 edge of the Proto-North Sea. Therefore, it covers the different long- and short-term climate  
28 perturbations of the Paleogene greenhouse. 56 samples from three individual sections of a lower  
29 Eocene seam in the record capture the typical succession of the vegetation in a coastal wetland  
30 during a period that was not affected by climate perturbation. This allows facies-dependent  
31 vegetational changes to be distinguished from those that were climate induced. Cluster analyses  
32 and NMDS of well-preserved palynomorph assemblages reveal four successional stages in the  
33 vegetation during peat accumulation: (1) a coastal vegetation, (2) an initial mire, (3) a transitional  
34 mire, and (4) a terminal mire. Biodiversity measures show that plant diversity decreased  
35 significantly in the successive stages. The highly diverse vegetation at the coast and in the  
36 adjacent initial mire was replaced by low diversity communities adapted to wet acidic  
37 environments and nutrient deficiency. The palynomorph assemblages are dominated by elements  
38 such as *Alnus* (Betulaceae) or *Sphagnum* (Sphagnaceae). Typical tropical elements which are  
39 characteristic for the middle Eocene part of the succession are missing. This indicates that a more  
40 warm-temperate climate prevailed in northwestern Germany during the early lower Eocene.

41

42

43

44

45

## 46 **Introduction**

47 The long-term warming trend of the early Paleogene greenhouse climate culminated in the Early  
48 Eocene Climatic Optimum (EECO) between *c.* 52 and 50 Ma before present (BP) [1]. It was  
49 interrupted by short-term warming events, the most prominent being the Paleocene-Eocene  
50 Thermal Maximum (PETM or ETM-1, e.g., [2-4]), which is associated with rapid temperature  
51 increases at the transition between the Paleocene and Eocene, which is estimated to have lasted  
52 about 170 ( $\pm$  30) kyr [5-7]. Other short-term events followed, such as the ETM-2 (*c.* 53.6 Ma BP  
53 [8,9]) and the ETM-3 (X- or K-event; *c.* 52.5 Ma BP [10,11]), but did not reach the temperatures  
54 of the PETM.

55 Recognition of these thermal events is has originally been based on carbon isotope  
56 excursions (CIE) observed in deep sea cores (e.g., [2,8,10,12-15]) and considered to result from  
57 massive release of light carbon (C13) to the atmosphere (e.g., [16,17]). The effect of the  
58 subsequent temperature increase on terrestrial environments has been debated and discussed with  
59 respect to migration of biota and extinction of species mainly in the North American Continental  
60 Interior. Especially the PETM was associated with large scale migrations of mammals including  
61 new modern type taxa along open routes in the North American Continental Interior [18,19]. But  
62 reports on corresponding effects of changes in vegetation are ambiguous, if not controversial, and  
63 appear to vary considerably depending on regional or local conditions. While species turnovers  
64 may have been more prevalent only in the tropics [20], a change from a mesophytic to a more  
65 thermophilic flora has been noted in the Bighorn Basin, Wyoming, USA [21]. In mid-latitude  
66 locations of Europe vegetation changes occurred essentially on a quantitative basis depending on  
67 local conditions or in response to increased precipitation [22,23]. In order to develop a more



68 coherent picture of the effects of the early Eocene thermal events on the terrestrial vegetation,  
69 additional case studies may be necessary.

70         The sedimentary succession of the former Helmstedt Lignite Mining District, which  
71 includes the mines at Schöningen, covers the entire Paleogene greenhouse phase and its gradual  
72 demise from the latest Paleocene to the middle Eocene almost continuously in the Helmstedt  
73 Embayment at the southern edge of the Proto-North Sea [24-26]. This offers the unique  
74 opportunity to trace the effects of all the long- and short-term climate perturbations on Paleogene  
75 terrestrial ecosystems across more than 10 million years. The study is part of a current project on  
76 changes in composition of the vegetation and plant diversity in the coastal environment of the  
77 Helmstedt Embayment across the EECO and its short-term perturbations such as the PETM and  
78 ETM-2 by using pollen and spores as proxies.

79         A first set of isotope analyses from the lower part of the lower Eocene Schöningen  
80 Formation revealed a carbon isotope excursion (CIE) from the very top of Seam 1 to the middle  
81 of Seam 2 including Interbed 2, indicating a warming event for this interval [27]. However, it is  
82 important to note that Seam 1 has been deposited during a period without any perturbations in  
83 climate and changes in vegetation were controlled by other factors than climate such as natural  
84 succession due to peat aggradation. Therefore, we selected Seam 1, for which three individual  
85 sections were available from the Schöningen outcrops and studied them palynologically including  
86 multivariate statistical analyses and biodiversity measures to determine more precisely the  
87 composition and variability of the regional flora unaffected by warming events. In this way we  
88 expect to be able to better identify possible thermophilic elements which may have invaded the  
89 area during warming events and to assess concomitant changes in diversity and quantitative  
90 composition.

91           The lignites of the Helmstedt Lignite Mining District, including Seam 1 at Schöningen,  
92 are somewhat unique among Eocene lignites in their close control by sea level dynamics and  
93 floristically different from the better known and widespread younger Miocene lignites. For  
94 images of the field situation at Schöningen we refer to [25,28].

95

## 96 **Geological setting**

97   The Helmstedt Lignite Mining District is situated within the Paleogene Helmstedt Embayment,  
98 which represented the mouth of an estuary opening towards the Proto-North Sea (Fig 1) between  
99 major uplifts corresponding to the Harz Mountains to the South and the Flechtingen Rise to the  
100 North [29]. The estuary extended far inland towards the area of Halle and Leipzig (Leipzig  
101 Embayment [30,31]). Due to the interaction between changes in sea level, salt withdrawal in the  
102 subsurface and climate-related changes in runoff from the hinterland, the area of Helmstedt and  
103 Schöningen was subject to frequent changes between marine and terrestrial conditions, repeatedly  
104 leading to peat formation [25,32].

105

106 **Fig 1. Paleogeographic map of Northwestern Europe during the lower Eocene.** The map  
107 shows the Helmstedt Embayment at the southern edge of the Proto-North Sea (H) in relation to  
108 important middle Eocene fossil localities in Germany, such as the Geiseltal (G), Messel (M), and  
109 Eckfeld (E); adapted from [27,33].

110

111           Today, the Paleogene deposits of the Helmstedt Lignite Mining District are limited to two  
112 marginal synclines accompanying the more than 70 km long salt wall of Helmstedt-Staßfurt (Fig

113 2) [29,34]. Both of the synclines are strongly asymmetric with steeply inclined strata dipping  
114 away from a narrow core of Zechstein salt while they are gently dipping on the opposite flanks.  
115 The influence of salt-withdrawal on sediment accumulation is indicated by the fact that the  
116 maximum thickness of the two lignite bearing sequences and of the individual coal seams moved  
117 towards the salt-wall with time [29,34].

118

119 **Fig 2. The regional setting of the Helmstedt Lignite Mining District.** (A) Geologic structural  
120 map of the area between the major uplifts of the actual Harz Mountains to the South and the  
121 Flechtingen Rise in the north (modified after [29]). The salt pillows and diapirs are not exposed at  
122 the surface, but buried under Mesozoic and Cenozoic sedimentary rocks. The red frame marks  
123 the detail presented in (C) (B = Braunschweig, H = Helmstedt, S = Schöningen, E = Egehn, St =  
124 Staßfurt). (B) Cross-section through the study area, showing the Helmstedt-Staßfurt salt wall and  
125 related synclines (modified after [29]). (C) The former opencast mines Schöningen Nordfeld and  
126 Schöningen Südfeld east of Schöningen. The positions of the three studied sections of Seam 1 are  
127 indicated. The map has been rendered with the software Maperitive using geodata from  
128 OpenStreetMap.

129

130 An approximately 400 m thick Paleogene succession in both synclines unconformably  
131 rests upon Mesozoic sediments of Triassic and lower Jurassic age (Figs 2 and 3) [29, 35]. The  
132 position of the lignites and two major marine transgressions in the sequence suggested a  
133 subdivision of the Paleogene strata from bottom to top in underlying sediments (now Waseberg  
134 Formation), Lower Seam Group (now Schöningen Formation), Emmerstedt Greensand (now  
135 Emmerstedt Formation), Upper Seam Group (now Helmstedt Formation) and overlying marine  
136 strata (now Annenberg-, Gehlberg-, und Silberberg Formations) (Fig 2) [25,36,37].

137

138 **Fig 3. Stratigraphic scheme of the Paleogene succession in the western and eastern Syncline**

139 **at Helmstedt and Schöningen.** The age model for the succession is based on K/Ar-ages [36,38],

140 nannoplankton zones [36], dinoflagellate zones [39] and palynological zones [40,41]. Data for

141 global changes in Paleogene sea-level [42] and higher order orbital cyclicity (long eccentricity

142 >589 kyr) [43] are used for a putative correlation to seams in the Schöningen Südfeld section.

143 The asterisk points to the stratigraphic position of the studied sections

144

145 The conventional age model (Fig 3) for the coal-bearing part of the Paleogene succession

146 of the Helmstedt Lignite Mining District is mainly based on scattered radiometric ages from

147 glauconites [36,38] as well as biostratigraphic data from nannoplankton [36], dinocysts [38,39]

148 and palynomorphs [40,41]. The data for the Schöningen, Emmerstedt and Helmstedt formations

149 were mostly derived from wells near Helmstedt in the eastern Syncline and have simply been

150 transferred by lithologic correlation to both synclines in the rest of the area. They suggest a lower

151 Eocene (Ypresian) age for the Schöningen Formation and a middle Eocene (Lutetian) age for the

152 Helmstedt Formation.

153 More recent results on quantitative data for the dinoflagellate cyst genus *Apectodinium*

154 and carbon isotopes from the section at Schöningen in the western syncline indicate that the

155 lowermost part of the Schöningen Formation may still be of Paleocene age [25,27]. Furthermore,

156 this age model appears consistent when the succession of seams at Schöningen is compared to

157 global changes in Paleogene sea-level and higher order cyclicity [25].

158 The Schöningen Formation as exposed in the opencast mine Schöningen-Südfeld (Fig 2)

159 of the western syncline has a thickness of about 155 m, including 9 almost continuous seams

160 (Main Seam and Seam 1 (this study) to Seam 9) and some additional seams of limited extent,

161 including Seam “L” and the “*Sphagnum* Seam” [25,44]. The Emmerstedt Formation cannot be  
162 identified at Schöningen since the characteristic greensand is missing.

163 Due to a lack of radiometric dates and relevant biostratigraphic information, the exact  
164 position of both, the Paleocene-Eocene boundary and the Ypresian-Lutetian boundary still remain  
165 unknown at Schöningen. The frequency of *Apectodinium* spp. just above Seam 1 in the western  
166 syncline [25,27] has been discussed as indicating the Paleocene-Eocene Thermal Maximum  
167 (PETM) (see [45-51]). However, the marker species of the PETM in open marine environments  
168 *A. augustum* [45], now *Axiodinium augustum* [52], is not found among the countless  
169 *Apectodinium* cysts above Seam 1 [27]. Furthermore, since *Apectodinium* acmes occur in  
170 marginal marine areas in the North Sea basin also at other times during the early and middle  
171 Eocene [53] the distinct carbon isotope excursion (CIE) co-occurring with the *Apectodinium*  
172 acme in Interbed 2 cannot unequivocally be related to the PETM and may point to another later  
173 warming event [27]. Thus, Seam 1, which is in the focus of our study, cannot be unambiguously  
174 dated at the moment.

175

## 176 **Methods**

### 177 **Sampling and sample processing**

178 Three sections of the 2.75 m to 3.75 m thick Seam 1 have been studied (Figs 2C and 4) in now  
179 abandoned opencast mines in the western syncline at Schöningen. Access to the sections in the  
180 field was provided by the Helmstedter Revier GmbH (formerly Braunschweigische Kohlen-  
181 Bergwerke, BKB and later E.ON). Section N (14 samples) was located in mine Schöningen-  
182 Nordfeld (52°09'23.8"N 10°58'44.0"E), while the sections S1 (12 samples) and S2 (30 samples)

183 were taken in mine Schöningen-Südfeld (S1: 52°08'07.1"N 10°59'29.7"E; S2: 52°08'27.9"N  
184 10°59'24.5"E). The field situation for S2 has been documented in [28]. The palynological data of  
185 sections S1 und S2 are based on new quantitative counts while the analysis of section N is based  
186 on data of Hammer-Schiemann (1998, unpublished doctoral dissertation, University of  
187 Göttingen).

188

189 **Fig 4. Lithological logs of the three studied sections of Seam 1.** Section N is located in mine  
190 Schöningen Nordfeld, sections S1 and S2 are from mine Schöningen Südfeld. Information on  
191 clastic sediment and lignite texture is based on field observation. Numbers indicate palynological  
192 samples.

193

194 Most of the individual layers which have been distinguished within Seam 1 in the three  
195 sections are represented in the present study by a single sample at least. In order to include the  
196 interbed/seam transitions, seven samples from the underlying Interbed 1 and the succeeding  
197 Interbed 2, which are both mainly composed of silty clays to clayey silts, have been studied in  
198 addition (Fig 4).

199 Palynological preparation followed the standard procedures as described by [54]  
200 including the successive treatment with hydrofluoric acid (HF), hydrogen peroxide (H<sub>2</sub>O<sub>2</sub>) and  
201 potassium hydroxide (KOH). Flocculating organic matter was removed by briefly oxidizing the  
202 residue with hydrogen peroxide (H<sub>2</sub>O<sub>2</sub>) after sieving with a mesh size of 10 µm. Remaining  
203 sample material and slides are stored at the Senckenberg Forschungsinstitut und Naturmuseum,  
204 Sektion Paläobotanik, Frankfurt am Main, Germany (repository number Schö XXXIII). No  
205 permits were required for the described study, which complied with all relevant regulations.

## 206 **Quantitative palynological analysis**

207 Numerical analyses of palynological data are based on quantitative palynomorph counts. At least  
208 300 individual palynomorphs per sample were identified and counted at 400 times magnification  
209 to obtain a representative dataset for statistical analysis. A complete list of all palynomorphs  
210 encountered during the present study with full names including authors is presented in the  
211 taxonomic list (S1 Table). Furthermore, raw data values for section N (S2 Table), section S1 (S3  
212 Table) and section S2 (S4 Table) are presented in the appendix. Identification of palynomorphs is  
213 based on the systematic-taxonomic studies of [24,55-58].

214         Despite the good preservation of palynomorphs 5-10% of the total assemblages could not  
215 be identified and have been counted as "Varia". To minimize potential errors in identification and  
216 counting of individual species some morphologically similar taxa have been lumped in the pollen  
217 diagrams and for statistical analysis, such as different species of the genera *Triporopollenites* or  
218 *Triatriopollenites*. In total, 45 groups of palynomorphs have been distinguished (see S1  
219 Appendix). To obtain a robust data set for diversity analyses the slides from 11 lignite samples of  
220 section S1 were additionally scanned for rare taxa that were not recorded during routine counting.

221         The pollen diagrams show the abundance of the most important palynomorphs as  
222 percentages. They are arranged according to their weighted average value (WA regression) [59]  
223 in relation to depth by using the software C2 1.7.6 [60]. However, WA regression leads to a  
224 different arrangement of taxa in the three pollen diagrams, since they may have different ranks in  
225 each of the three data sets. Therefore, we used the median rank of the individual taxa to get an  
226 identical arrangement of palynomorphs in the three pollen diagrams. Pollen and spores were  
227 calculated to 100%, whereas algae, such as *Botryococcus*, dinoflagellates and other organic  
228 particles, such as fungal remains, cuticles or charcoal were added as additional percentages (in %  
229 of the total sum of pollen and spores).

## 230 **Statistical analysis**

231 Statistical analyses followed a routine which has already been applied by the authors in previous  
232 studies [61,62]. We used Wisconsin double standardized raw data values [63-66]. Wisconsin  
233 standardization scales the abundance of each taxon or group of taxa to their maximum values and  
234 represents the abundance of each of these palynological variables by its proportion in the sample  
235 [67]. This equalizes the effects of rare and abundant taxa and removes the influence of sample  
236 size on the analysis [63,64].

237 For the robust zonation of the pollen diagrams of the three sections and to identify  
238 samples with similar palynomorph contents, Q-mode cluster analysis was established using the  
239 unweighted pair-group average (UPGMA) method and the Bray-Curtis distance (software PAST  
240 3.26 [68]). Furthermore, to illustrate compositional differences and ecological trends in Seam 1,  
241 and to visualize the level of similarity between samples, non-metric multidimensional scaling  
242 (NMDS) with the standardized raw data values and the Bray-Curtis dissimilarity [63,69] has been  
243 performed for each of the three studied sections as well as for the complete data set using the  
244 software PAST 3.26 [68]. NMDS is the most robust unconstrained ordination method in ecology  
245 [70] and has been successfully applied to palynological data in previous studies (e.g., [61,67,71-  
246 73]). It avoids the assumption of a linear or unimodal response model between the palynomorph  
247 taxa and the underlying environmental gradients as well as the requirement of normal distributed  
248 data.

## 249 **Diversity analysis**

250 In addition to the quantitative analysis of the 45 groups of palynomorphs that are presented in the  
251 pollen diagrams, in section S1 the palynomorph assemblage has been studied with the highest  
252 possible taxonomic resolution allowing a detailed analysis of the diversity of the microflora (S5



253 Table). For diversity analysis, morphologically distinct pollen “species” were recorded  
254 representing the morpho-diversity of the palynomorph assemblage. However, these morpho-types  
255 do not necessarily reflect different parent plants and may also include morphological variation  
256 within the same plant family or genus. Furthermore, morphological diversity within a natural  
257 species may include different morpho-types [74]. Nevertheless, since this affects all samples to  
258 the same extent, the diversity measures still lead to a robust picture of the diversity of the parent  
259 vegetation.

260 To estimate the changes in taxonomic diversity between single samples and different  
261 pollen zones (PZs) within Seam 1, several calculations for species richness and evenness were  
262 applied, using tools for biodiversity analysis as provided by [75,76]. Richness is simply the  
263 number of taxa within an ecosystem, which is here calculated as the total number of  
264 palynological taxa within a sample or a PZ [77]. It can be measured at different scales, for which  
265 mainly the three terms alpha, beta, and gamma diversity have been used [78]. The definitions of  
266 these terms were originally based on the comparison of diversity in different areas or regions.  
267 Here, we use these terms to describe the temporal comparison of diversity changes within Seam  
268 1. Furthermore, we use the term point diversity (within-sample diversity resp. standing richness  
269 of [79]) for the richness within a single sample which reflects the total number of taxa as found in  
270 the counted number of individual grains [80]. Alpha diversity is regularly related to the diversity  
271 within a community or habitat [80] and is here used as a measure for diversity within a PZ, since  
272 this represents a specific community during the evolution of the vegetation in Seam 1. Gamma  
273 diversity normally includes the species richness in a larger area within a landscape [80] but is  
274 here used as a measure for the richness in the complete seam summarizing the vegetation of the  
275 peat-forming communities at Schöningen. Beta diversity that links alpha and gamma diversities is  
276 here used as a measure of the difference in species composition between two samples, within a

277 specific PZ or within the whole seam [78,80-82]. Here we adapt Whittaker's [78,83] original  
278 suggestion for calculating beta diversity, which is most frequently employed in ecological studies  
279 [84]. For comparison between two samples, beta diversity is calculated by the total number of  
280 species within the two samples divided by the average species number within the two samples.  
281 Beta diversity calculations within a PZ and within Seam 1 are calculated as the total species  
282 number within the specific PZ or the whole seam divided by the average species number in  
283 samples from the PZ/Seam 1. We applied software PAST 3.26 [68] for calculation of point and  
284 beta diversity as well as EstimatesS v. 9.1.0 [76] for the analysis of alpha and gamma diversity.

285       Species richness cannot directly be estimated by observation and not accurately measured,  
286 because the observed number of species in a sample is always a downward-biased estimator for  
287 the complete species richness in an assemblage [85]. Therefore, the calculation of the number of  
288 palynological species within a single sample or a PZ in the succession of Seam 1 is always an  
289 underestimate of the possible number of species. Nevertheless, the calculated richness values can  
290 be used as reliable information at least on relative changes of point and alpha diversity.

291       Evenness is the distribution of pollen taxa within a pollen assemblage [80]. A low  
292 evenness indicates an assemblage with one or more dominant taxa, characterized by high  
293 numbers of pollen grains of the same types, whereas high evenness points to an assemblage  
294 without dominant taxa, indicated by equally distributed taxa [86]. Evenness (E) has been  
295 calculated using the formula provided by [77] ( $E = H/\ln(R)$ ) producing evenness values between 0  
296 (low evenness) and 1 (high evenness). For Shannon-Wiener index (H) and richness (R) we used  
297 the estimations provided by [75] based on calculations for point diversity within 300 counts, for  
298 alpha diversity within 5 samples and for gamma diversity within 20 samples (Tables 1 and 2).

## 299 **Results**

300 The three studied sections in the western syncline have been arranged from NW to SE following  
301 the order of proximity to the sea (Fig 2C). Section N is closest to the sea and the only one  
302 including some horizons of clayey lignite and carbonaceous clay (Fig 4). Four lithotypes of  
303 lignite have been distinguished in the field, depending mainly on the relative proportion of fine-  
304 grained matrix and tissue remains as well as clay content, i.e., matrix dominated, tissue  
305 dominated, mixed tissue/matrix lithotype and clayey lignite (Fig 4). The terminology is adapted  
306 from [87]. Matrix dominated lithotypes tend to occur preferentially in the lower part of the three  
307 sections. However, despite a general upward increase, the degree of tissue preservation remains  
308 relatively low throughout most of the seam. In many sections the top of Seam 1 is intensely  
309 bioturbated. Charcoal shows a general upward increase in the more inland sections S1 and S2, but  
310 no correlation with specific lithotypes.

311 Based on unconstrained Q-mode cluster analysis (Figs 5B, 6B, 7B) five distinct  
312 palynomorph assemblages have been recognized in the three studied sections, which can be  
313 distinguished by NMDS (Figs 5C, 6C, 7C). They are arranged as palynozones (PZ) in a vertical  
314 succession, which shows that the general development of the vegetation was identical in the three  
315 sections of Seam 1. The term “palynozone” is used here in the sense of representing plant  
316 communities [88]. Abundance variations of palynomorphs within PZs between sections indicate  
317 local differences in vegetation patterns.

318

319 **Fig 5. Pollen diagram, cluster analysis and NMDS of section N.** (A) Pollen diagram of 14  
320 samples from the top of Interbed 1 to the base of Interbed 2 of section N showing the most  
321 common palynomorph taxa. The zonation in different PZs is based on cluster analysis (B) Result  
322 of an unconstrained cluster analysis of Wisconsin double standardized raw-data values using the  
323 unweighted pair-group average (UPGMA) method together with an Euclidean distance (C) Non-

324 metric multidimensional scaling (NMDS) plot of palynological data using the Bray-Curtis  
325 dissimilarity and Wisconsin double standardized raw-data values. The scatter plot shows the  
326 arrangement of samples and palynomorph taxa.

327

328 **Fig 6. Pollen diagram, cluster analysis and NMDS of section S1.** (A) Pollen diagram of 12  
329 samples from the base of Seam 1 to the base of Interbed 2 of section S1 showing the most  
330 common palynomorph taxa. The zonation in different PZs is based on cluster analysis (B) Result  
331 of an unconstrained cluster analysis of Wisconsin double standardized raw-data values using the  
332 unweighted pair-group average (UPGMA) method together with an Euclidean distance (C) Non-  
333 metric multidimensional scaling (NMDS) plot of palynological data using the Bray-Curtis  
334 dissimilarity and Wisconsin double standardized raw-data values. The scatter plot shows the  
335 arrangement of samples and palynomorph taxa.

336

337 **Fig 7. Pollen diagram, cluster analysis and NMDS of section S2.** (A) Pollen diagram of 30  
338 samples from the top of Interbed 1 to the base of Interbed 2 of section S2 showing the most  
339 common palynomorph taxa. The zonation in different PZs is based on cluster analysis (B) Result  
340 of an unconstrained cluster analysis of Wisconsin double standardized raw-data values using the  
341 unweighted pair-group average (UPGMA) method together with an Euclidean distance (C) Non-  
342 metric multidimensional scaling (NMDS) plot of palynological data using the Bray-Curtis  
343 dissimilarity and Wisconsin double standardized raw-data values. The scatter plot shows the  
344 arrangement of samples and palynomorph taxa.

345

346 PZ 1 and PZ 5 include samples from the adjacent Interbeds 1 and 2, and reflect the state  
347 of vegetation during the marine-terrestrial transition below and the terrestrial-marine transition

348 above the seam. PZs 2, 3, and 4, on the other hand, represent different stages of the peat forming  
349 vegetation during seam formation.

350

### 351 **Palynozone 1 (top Interbed 1)**

352 The two samples from Interbed 1 (sample N-1, Fig 5A and sample S2-1, Fig 7A) show marine  
353 influence with the occurrence of dinocysts (*Apectodinium* spp.). The NMDS of S2 samples (Fig  
354 7C) shows that sample S2-1 is clearly different from the seam, because it is plotted in the  
355 ordination space on the negative side of NMDS axis 2 together with samples of Interbed 2 (PZ 5)  
356 but separate from all of the lignite samples (PZ 2 - 4). Sample N-1 (Fig 5C) is plotted in the upper  
357 right corner of the ordination space very close to samples from the base of Seam 1 (PZ 2a)  
358 indicating a more gradual change of the vegetation from marginal marine habitats to the peat-  
359 forming environment at this site.

360 The only true mangrove element *Rhizophora* (*Zonocostites ramonae*, Fig 8I), in the  
361 Schöningen Formation, occurs in low abundance in PZ 1 of section S2 and in PZ 5 of sections S1  
362 and S2. *Inaperturopollenites* spp. (Cupressaceae s.l., Figs 8A, B) dominate the pollen  
363 assemblages with values of up to 37%. Other common taxa of sample N-1 are  
364 *Tricolporopollenites cingulum* (Fagaceae, 9.4%, Figs 8C, D, E), *Plicatopollis* spp. (Juglandaceae,  
365 7.7%, Fig 8K), *Tricolpopollenites liblarensis* (Fagaceae, Fig 8F) and *T. retiformis* (Salicaceae,  
366 Fig, 8H), each with 5.1% as well as *Plicapollis pseudoexcelsus* (Juglandaceae?, 4.3%, Fig 8J).

367

368 **Fig 8. Important palynomorphs of PZs 1, 2 and 5.** (A) *Inaperturopollenites concedipites*,  
369 Cupressaceae s.l. (sample S1-12), (B) *Cupressacites bockwitzensis*, Cupressaceae s.l. (sample S1-  
370 12); (C) *Tricolporopollenites cingulum fusus*, Fagaceae (morphotype 1 with a rough exine, larger

371 than morphotype 2; sample S1-12), (D) *Tricolporopollenites cingulum fusus*, Fagaceae  
372 (morphotype 2 with a smooth exine, smaller than morphotype 1; sample S1-12), (E)  
373 *Tricolporopollenites cingulum pusillus*, Fagaceae (morphotype 2, sample S1-9), (F)  
374 *Tricolporopollenites liblarensis liblarensis*, Fagaceae (sample S1-12), (G) *Tricolporopollenites*  
375 *quisqualis*, Fagaceae (sample S1-12); (H) *Tricolporopollenites retiformis*, Salicaceae (sample S1-  
376 4); (I) *Zonocostites ramonae*, ?Rhizophoraceae (sample S1-8); (J) *Plicatopollis pseudoexcelsus*,  
377 ?Juglandaceae (sample S1-9); (K) *Plicatopollis hungaricus*, Juglandaceae (sample S1-3); (L)  
378 *Alnipollenites verus*, Betulaceae (sample S1-3); (M) *Dicolpopollis kockeli*, Arecaceae (sample  
379 S1-3); (N), (O) *Nyssapollenites kruschii accessorius*, Nyssaceae (samples S1-12, S1-3); (P)  
380 *Ilexpollenites iliacus*, Aquifoliaceae (sample S1-4); scale bars: 10µm

381

382 In sample S2-1 *Plicatopollis* spp. (6.7%) and *P. pseudoexcelsus* (8.0%) are also very  
383 common, while the fagaceous taxa *T. liblarensis* and *T. cingulum* as well as *T. retiformis* are less  
384 frequent compared to sample N-1.

## 385 **Palynozone 2 (Seam 1)**

386 PZ 2 (Figs 5A, 6A, 7A) includes the lower part of Seam 1 and can be subdivided into two  
387 subzones in sections N and S2. The difference to other samples of the seam is best expressed in  
388 section S2 in the NMDS where samples of PZ 2 are clearly separate on the right side of the  
389 ordination space (Fig 7C). In the other two sections, samples from adjacent interbeds are close to  
390 PZ 2 samples in the ordination space, thus, indicating the proximity of PZ 2 to the pollen  
391 assemblages of Interbed 1 and Interbed 2 (Fig 5C, resp. 6C).

392 In contrast to PZ 1, dinoflagellate cysts are completely missing in PZ 2. In the  
393 composition of the pollen assemblage the most striking change is the occurrence of *Alnipollenites*

394 *verus* (Betulaceae, *Alnus*, Fig 8L), which reaches a maximum of 57.5% in section S2. Although  
395 much lower, the maxima of *A. verus*, too, occur in PZ 2: 25.3% in section N resp. 2.9% in section  
396 S1.

397 *Tricolporopollenites cingulum* (Fagaceae) is among the dominant elements in sections N  
398 and S2. In section S1 maximum values are distinctly lower, but also reached in PZ 2. Other taxa  
399 with maxima in PZ 2 are *Spinaepollis spinosus* (Euphorbiaceae?), *Nyssapollenites* spp.  
400 (Nyssaceae, Figs 8N, O) and *Ilexpollenites* spp. (Aquifoliaceae, Fig 8P). The lowest values for  
401 these taxa occur again in section S1. *Inaperturopollenites* sp. is still characterized by high values  
402 (24.6%), a slight decrease, however, from PZ 1.

403 A few taxa strongly decrease within PZ 2 and, therefore permit the separation of subzones  
404 PZ 2a and PZ 2b for sections N and S2. This is the case, in particular, for *Thomsonipollis*  
405 *magnificus* (unknown botanical affinity, Fig 9F) which drops from 18% in section N to near  
406 absence in PZ 2b. Similarly, the fern spores *Leiotriletes* spp. (Schizaeaceae, Figs 9B, C, D) and  
407 other trilete spores disappear almost completely in PZ 2b except for a slight increase at the top of  
408 PZ 2 in section S1. These spores are replaced in PZ 2b by other fern spores such as  
409 *Laevigatosporites* spp. (Polypodiaceae, Fig 9 E), which are rare in PZ 2a.

410

411 **Fig 9. Important palynomorphs of PZs 3 and 4.** (A) *Tricolporopollenites belgicus*, unknown  
412 botanical affinity (sample S1-2), (B) *Leiotriletes microadriennis*, Schizaeaceae (sample S1-4),  
413 (C) *Leiotriletes adriennis*, Schizaeaceae (sample S1-6), (D) *Leiotriletes paramaximus*,  
414 Schizaeaceae (sample S1-4); (E) *Laevigatosporites discordatus*, Polypodiaceae (sample S1-3);  
415 (F) *Thomsonipollis magnificus*, unknown botanical affinity (sample S1-2); (G) *Milfordia incerta*,  
416 Restionaceae (sample S1-9); (H) *Basopollis atumescens*, unknown botanical affinity (sample S1-  
417 8); (I) *Tripoporopollenites crassus*, Myricaceae (sample S1-10), (J) *Tripoporopollenites robustus*,

418 Myricaceae (sample S1-8), (K) *Triporopollenites rhenanus*, Myricaceae (sample S1-8), (L)  
419 *Pompeckjoidaepollenites subhercynicus*, unknown botanical affinity (sample S1-3), (M)  
420 *Ericipites ericius*, Ericaceae (sample S1-11); scale bars: 10µm

421

422 The relative loss of these taxa in PZ 2b is in part compensated by increases in  
423 *Monocolpopollenites tranquillus* (Arecaceae, *Phoenix*), *Tricolpopollenites retiformis*,  
424 *Tricolporopollenites belgicus* (unknown botanical affinity, Fig 9A) and *Tricolpopollenites*  
425 *liblarensis* in section S2 (Fig 7A), in section N additionally by *Ilexpollenites* spp. (Fig 5A). The  
426 small number of samples in section S1 here precludes a subdivision of PZ 2.

### 427 **Palynozone 3 (Seam 1)**

428 PZ 3 covers the middle of Seam 1 and is represented by 4 samples each in sections N and S1 and  
429 by 3 samples in section S2. The NMDS of all sections show that samples of PZ 3 are separated  
430 from other PZs in the ordination space indicating a unique assemblage composition. Especially in  
431 sections N and S2 (Fig 5C resp. 7C) the samples are plotted midway between those of PZ 2 and  
432 PZ 4 indicating that the assemblages include elements from the preceding and succeeding PZs. In  
433 section S1 PZ 3 is plotted on the left side of the ordination space clearly separated from the other  
434 two seam-related PZs (Fig 6C). However, sample S1-5 is plotted far away from the other samples  
435 of PZ 3 on the negative end of NMDS axis 1 (Fig 6C) suggesting a difference in assemblage  
436 composition not readily recognized in the pollen diagram (Fig 6A).

437 *Alnipollenites verus* has virtually disappeared except for local abundance in section S2.  
438 Similarly, *Tricolporopollenites cingulum* decreases from relatively high values in section N to  
439 10.8% and from low values in section S1 to less than 1%. Only in section S2 it does remain at  
440 similar high levels. Other taxa such as *Spinaepollis spinosus*, *Ilexpollenites* spp., *Nyssapollenites*



441 spp., and *Tricolpopollenites liblarensis* decrease consistently in sections N and S1 as well as  
442 *Tricolporopollenites belgicus* in section S2.

443 *Pompeckjoidaepollenites subhercynicus* (unknown botanical affinity, Fig 9L) suddenly  
444 appears with high values (up to 20.2% in section S1) and extends to the base of PZ 4 in sections  
445 N and S2. *Tripoporopollenites robustus* (Myricaceae, Figs 9I - K) as well as spores of Sphagnaceae  
446 such as *Sphagnumsporites* sp., *Tripunctisporis* sp. and, *Distancorisporis* sp. [89] (Fig 10) are  
447 abundant before becoming prevalent in PZ 4. Both, *T. robustus* and *Sphagnum*-type spores  
448 together are already prevalent in PZ 3 of section S1.

449

450 **Fig 10. Variation of *Sphagnum*-type spores in PZs 3 and 4.** Morphological variation in  
451 *Tripunctisporis* sp. (A), (B), *Sphagnumsporites* sp. (C) and *Distancorisporis* sp. (D), (E), (F);  
452 scale bars: 10µm

453

454 Sample S1-5 (section S1) is special among PZ 3 samples (Fig 6C) due to the high  
455 abundance of spores produced by ferns and peat mosses. More than two thirds of the  
456 palynomorphs in this sample are composed of spores. Accordingly, *P. subhercynicus* and *T.*  
457 *robustus* remain proportionally rare.

## 458 **Palynozone 4 (Seam 1)**

459 PZ 4 comprises the upper part of Seam 1 and represents a significant change from the  
460 palynomorph assemblages of preceding PZs 2 and 3 (Figs 5A, 6A, 7A). This becomes  
461 particularly evident in the NMDS. In all three sections samples of PZ 4 are clearly separated from  
462 all other samples in the ordination space (Figs 5C, 6C, 7C) due to the dominance of *Sphagnum*-  
463 type spores, which reach maximum values between 38% and 52%. A similar dominance is shown

464 for myricaceous pollen, e.g., *Triporopollenites robustus/rhenanus*, with values between 23% and  
465 30%.

466 *Pompeckjoidaepollenites subhercynicus*, a major element of PZ 3 continues to dominate  
467 (up to 28%) into the lower part of PZ 4 in sections N and S2. In section S1, however, it is rare.  
468 Pollen of the Normapolles group (e.g. *Basopollis* spp., Fig 9H) and Restionaceae (*Milfordia* spp.,  
469 Fig 9G) have a strong showing in PZ 4 of section S1, but together with *Ericipites* spp. (Ericaceae,  
470 Fig 9M) a distinct reduction over PZ 3 in section N. *Momipites punctatus* (Juglandaceae,  
471 *Engelhardia*) is quite common for the first time in section S2 but rare in the other two sections.  
472 *Laevigatosporites* spp. are reduced in sections S1 and S2 but increase in section N. *Alnipollenites*  
473 *verus* is extremely rare in PZ 4 of all sections.

## 474 **Palynozone 5 (base Interbed 2)**

475 PZ 5 includes mainly samples from Interbed 2 (Figs 5A, 6A, 7A). In all sections a marine  
476 influence is indicated by the onset of dinocysts of *Apectodinium* spp. with maximum values of  
477 65.5%. This clearly distinguishes the transition of Interbed 1 to the seam from the transition of  
478 the top of the seam to Interbed 2. However, the NMDS of sections N (Fig 5C) and S2 (Fig 7C)  
479 show that the palynomorph assemblage composition of both is similar at the beginning and end of  
480 seam development. Both PZs are plotted in the ordination space in close vicinity. The NMDS of  
481 section S1 (Fig 6C), however, shows similarities in assemblage composition between PZ 5 and  
482 PZ 2 since one of the samples (S1-12) is plotted in the NMDS in the upper right corner of the  
483 ordination space. But, according to the cluster analysis, the closest similarity of S-12 is to S1-1 at  
484 the base of the seam (Fig 6B).

485 Drastic changes from PZ 4 include the disappearance of *Sphagnum*-type spores and the  
486 strong increase of *Inaperturopollenites* spp. with a maximum of 41.3% in section S1. These are

487 similar values as in PZ 1. The pollen of the juglandaceous alliance such as *Plicapollis*  
488 *pseudoexcelsus* (up to 4.8%) and *Plicatopollis* spp. (up to 8.9%) as well as the fagaceous pollen  
489 *Tricolpopollenites liblarensis* (up to 15.5%) reach high values that are in the range of their values  
490 within PZ 1. *Tripoporollenites robustus/rhenanus* (up to 9%) are also common, although the  
491 values strongly decrease compared to PZ 4.

492

### 493 **Non pollen/spore palynofacies (section S2)**

494 In section S2 a selection of organic particles, such as fungal remains, periderm cells, cuticle  
495 fragments, resin and tannin bodies (resinite/phlobaphinite) as well as charcoal have been  
496 quantitatively recorded in addition to palynomorphs and calculated to 100% palynomorphs (Fig  
497 11).

498

499 **Fig 11. Abundance of non-pollen/spore palynofacies elements (NPP) in section S2.** Diagram  
500 of 30 samples from the top of Interbed 1 to the base of Interbed 2 of section S2 showing the  
501 distribution of NPPs. The zonation of the diagram is based on unconstrained cluster analysis of  
502 palynomorph taxa (see Fig 7).

503

504 Fungal remains are common in PZ 2, albeit with wide variations in frequency between  
505 barely present and 28%. In PZ 3 and PZ 4 fungal values drop to a few percent (less than 6%) only  
506 to rise at the very top of the seam again. Fungal remains do not stray beyond the seam.

507 This holds true for periderm cells as well. However, contrary to fungal remains periderm  
508 cells are nearly absent in the lower part of PZ 2 (PZ 2a) but rise markedly at the base of PZ 2b.  
509 With sample S2a-10 they drop back to insignificance only to return, similar to fungal remains,

510 near the top of the seam with maximum values (18%). The marked change in periderm cells from  
511 PZ 2a to PZ 2b is accompanied by an equally marked increase of some tricol(po)rate taxa, e.g.  
512 *Tricolpopollenites retiformis*, *T. liblarensis/microhenrici* and *Tricolporopollenites belgicus* (Fig  
513 7A). Cuticle fragments are remnants of leaf cuticles which are easily washed out to the sea and  
514 drifting onshore along the shoreline [90,91]. Accordingly, they appear most frequently in PZ 1  
515 and PZ 5.

516 Resin (resinite) and tannin-derived bodies (phlobaphinites) are the most common organic  
517 components second to charcoal. They represent resistant cell fillings set free from decaying wood  
518 and are most abundant in PZ 2a and PZ 2b, but common to frequent throughout the whole seam  
519 with considerable fluctuation.

520 Charcoal particles become the dominant non-palynomorph element in PZ 3 and especially  
521 in PZ 4 in striking parallelism to the frequency of *Sphagnum*-type spores and the  
522 *Tripoporopollenites robustus/rhenanus* group. The appearance of pollen of the Normapolles group  
523 and freshwater algae (*Zygnemataceae*) also coincides with the dominance of charcoal in PZ 4.

524

## 525 **Diversity (section S1)**

526 In order to get estimates for palynological richness, rarefaction analyzes of 11 samples from  
527 Seam 1 were performed, distinguishing between point diversity within a single sample (Fig 12A,  
528 Table 1), alpha diversity within PZs 2 to 4 (Fig 12B, Table 2) and gamma diversity for the entire  
529 seam (Fig 12C, Table 2). Furthermore, analysis of beta diversity as well as evenness have been  
530 carried out (Tables 1 and 2).

531

532 **Fig 12. Palynological richness calculations for Seam 1 in section S1 using rarefaction**  
 533 **analyses.** (A) Point diversity: Individual rarefaction with conditional variance of 11 samples of  
 534 Seam 1 using the algorithm of [92]. (B) Alpha diversity: Sample-based interpolation and  
 535 extrapolation using the Bernoulli product model [75] for the 3 palynozones (PZ) of Seam 1 with  
 536 95% unconditional confidence intervals; S<sub>obs</sub>, number of observed species. (C) Gamma  
 537 diversity: Sample-based interpolation and extrapolation using the Bernoulli product model [75]  
 538 for the entire data set of samples from Seam 1; S<sub>obs</sub>, number of observed species. Because of  
 539 differences in the number of counted individuals per sample, the sample-based rarefaction curves  
 540 and their confidence intervals in (B) and (C) are replotted against an x-axis of individual  
 541 abundance.

542

543

544 **Table 1: Estimations of palynological richness and evenness based on individual rarefaction**  
 545 **analysis for 11 lignite samples of section S1 (point diversity).**

|                                          | S1-1 | S1-2 | S1-3 | S1-4 | S1-5 | S1-6 | S1-7 | S1-8 | S1-9 | S1-10 | S1-11 |
|------------------------------------------|------|------|------|------|------|------|------|------|------|-------|-------|
| Individuals counted                      | 416  | 346  | 343  | 502  | 305  | 316  | 304  | 316  | 310  | 329   | 328   |
| S <sub>obs</sub>                         | 74   | 88   | 63   | 59   | 30   | 41   | 48   | 45   | 50   | 51    | 72    |
| S(est) <sub>300</sub>                    | 61.7 | 81.6 | 58.6 | 46.3 | 29.7 | 40.0 | 47.8 | 43.8 | 49.3 | 48.3  | 68.2  |
| S(est) <sub>300</sub> Std.err, 2σ, Lower | 56.1 | 77.3 | 54.9 | 40.8 | 28.7 | 38.1 | 46.8 | 41.7 | 47.7 | 45.3  | 64.7  |
| S(est) <sub>300</sub> Std.err, 2σ, Upper | 67.4 | 86.0 | 62.3 | 51.7 | 30.8 | 41.9 | 48.7 | 45.9 | 50.9 | 51.3  | 71.7  |
| Shannon-Wiener index                     | 3.24 | 3.70 | 3.13 | 2.84 | 2.19 | 2.76 | 3.13 | 2.72 | 3.02 | 2.37  | 3.19  |
| Evenness (E)                             | 0.79 | 0.84 | 0.77 | 0.74 | 0.65 | 0.75 | 0.81 | 0.72 | 0.78 | 0.61  | 0.76  |

546 S<sub>obs</sub>: Actual number of taxa within the samples; S(est)<sub>300</sub>: Expected number of species for 300  
 547 counted palynomorphs using the algorithm of [92]; S(est)<sub>300</sub> Std.err, 2σ: Lower and upper bounds  
 548 for a standard error of two-sigma of unconditional variance for 300 palynomorphs; evenness  
 549 calculation using the method of [77]: E = Shannon-Wiener index/ln(S<sub>obs</sub>).

550

551 **Table 2: Estimations of richness and evenness using sample-based incidence data for the 3**  
 552 **palynozones (PZ) of Seam 1 (alpha diversity) and for all samples of Seam 1 (gamma**  
 553 **diversity).**

|                                | PZ 2  | PZ 3  | PZ 4  | Seam 1 |
|--------------------------------|-------|-------|-------|--------|
| Number of samples (n)          | 3     | 4     | 4     | 11     |
| $S_{obs}$                      | 126   | 99    | 110   | 179    |
| Individuals counted            | 1105  | 1427  | 1283  | 3815   |
| $S(est)_5$                     | 144   | 111   | 119   | 217*   |
| $S(est)_5$ 95% CI, Lower Bound | 131.2 | 96.5  | 107.9 | 196.0* |
| $S(est)_5$ 95% CI, Upper Bound | 154.7 | 124.6 | 130.5 | 238.3* |
| Singeltons                     | 49    | 40    | 41    | 58     |
| Doubletons                     | 21    | 13    | 21    | 20     |
| Shannon-Wiener index           | 3.89  | 3.09  | 3.12  | 3.69   |
| Evenness (E)                   | 0.80  | 0.67  | 0.66  | 0.71   |
| Beta diversity                 | 0.68  | 1.23  | 1.02  | 2.17   |

554  $S_{obs}$ : Actual number of taxa within the samples;  $S(est)_5$ : Expected number of species in 5 samples  
 555 using the Bernoulli product model [75];  $S(est)_5$  95% CI: Lower and upper bounds of 95%  
 556 confidence interval for  $S(est)$ ; \* $S(est)$  and \* $S(est)$  95% CI in 20 samples; Singeltons: Number of  
 557 species that occur only once in all samples; Doubletons: Number of species that occur only twice  
 558 in all samples; evenness calculation using the method of [77]:  $E = \text{Shannon-Wiener index} / \ln(S_{obs})$ ;  
 559 beta diversity using the measure of [78,83]:  $(S/\bar{a}) - 1$  (S, total number of species in the PZ or  
 560 Seam 1;  $\bar{a}$ , average number of species in the PZ or Seam 1; \*\* beta diversity estimation without  
 561 sample S1-5).

562

563 Comparison of point diversity within the seam as based on individual rarefaction analyzes  
 564 using the algorithm of [92], samples of PZ 2 (S1-1 to S1-3) together with sample S1-11 from the

565 top of the seam provides the highest richness values (Fig 12A). While in samples S1-1, S1-3 and  
566 S1-11 between 59 and 68 species at 300 counted individuals can be expected, sample S1-2 shows  
567 by far the highest number with 82 species (Table 1). The richness in samples from the succeeding  
568 PZs 3 and 4 (samples S1-4 to S1-10) is significantly lower with values typically ranging from 40  
569 to 49 species among 300 counted palynomorphs (Table 1). In sample S1-5, the lowest value with  
570 only 30 different species is achieved. Therefore, a decrease in palynological richness between PZ  
571 2 and PZs 3 and 4 is significant. Only at the top of the seam in sample S1-11 an increase of  
572 richness to values similar to those in PZ 2 is recognizable.

573 The same pattern of species richness is also evident in alpha diversity (Fig 12B). 126  
574 different pollen and spore taxa have been recorded in the three samples of PZ 2 while  
575 significantly lower numbers were observed in the subsequent PZ 3 with 99 species and in PZ 4  
576 with 110 species, although the number of samples and of counted palynomorphs in these two PZs  
577 is higher than in PZ 2 (Table 2). Even if the 95% confidence intervals are considered, which  
578 describe the range of the possible number of species within the PZs, the richness in PZ 2 is  
579 significantly higher than in the two subsequent PZs (Table 2). For PZ 3 and PZ 4 the 95%  
580 confidence intervals overlap somewhat (Fig 12B). A diversity increase from PZ 3 to PZ 4 is  
581 therefore indicated by the richness estimations, but this is not statistically significant.  
582 Furthermore, the interpolation/extrapolation graph of PZ 3 is not saturated indicating that the  
583 maximum number of species is higher than calculated and may possibly be in the same range or  
584 even higher than in PZ 4.

585 The high number of singletons and doubletons, showing the number of species with only  
586 one or two individuals within the data set, is striking (Table 2). For example, 70 of 126 species of  
587 pollen and spores in PZ 2 and 53 of 99 species in PZ 4 have only been recorded one or twice.  
588 Therefore, *c.* 55% of the species in the three PZs are singletons or doubletons indicating

589 accordingly that more than half of the species within the total pollen assemblages belong to rare  
590 taxa.

591 The analysis of gamma diversity (Fig 12C) shows a high overall species richness for the  
592 entire section. 179 different species have been detected in Seam 1. An extrapolation to 20  
593 samples even indicates a much higher number of morphologically distinct species (217, see Table  
594 2). Since the interpolation/extrapolation graph is not saturated, even more species can be  
595 expected (Fig 12C).

596 Beta diversity as a measure of the difference in species composition is especially high in  
597 comparison between sample S1-5 and the other samples with values always higher than 0.6 (S6  
598 Table). This underlines the special composition of the palynomorph assemblage of sample S1-5  
599 in comparison to the other lignite samples of section S1. In contrast, the values for beta diversity  
600 of sample comparisons within the same PZs are generally below 0.5 or between 0.5 and 0.6 if  
601 samples of different PZs are compared. This indicates minor changes in the composition of the  
602 palynomorph assemblages within the PZs, but changes in composition between PZs 2, 3, and 4.  
603 This is also confirmed by general beta diversity calculations for the PZs (Table 2). They are low  
604 with 0.68 for PZ 2 and 1.02 for PZ 4. Only in PZ 3 the value increases to 1.23, but this is due to  
605 the specific composition of the palynomorph assemblage in sample S1-5. If this sample is  
606 excluded from the analysis, the value drops to 0.74. In contrast, the total beta diversity value of  
607 2.17 for Seam 1 is significantly higher indicating strong changes in the composition of the  
608 palynomorph assemblages between the individual PZs (Table 2).

609 In addition to species richness, the calculation of evenness provides another important  
610 parameter for diversity analysis. In single samples from Seam 1, usually evenness values of more  
611 than 0.7 are reached (Table 1). These high values show that the different palynomorph species  
612 within the microfloral assemblages are in general evenly distributed in the individual samples.



613 This indicates that (except for the high number of rare elements which contribute to the richness  
614 calculation) none of the abundant elements is clearly dominating. Only in samples S1-5 and S1-  
615 10 do the evenness values decrease to 0.64 and 0.61 showing that in these samples a dominance  
616 of some elements within the pollen assemblage becomes apparent.

617 PZ 3 and PZ 4 are characterized by relatively low evenness values of 0.67 and 0.66 (Table  
618 2). In contrast, the evenness for PZ 2 is significantly higher with 0.8. Together with the high  
619 value for species richness, the high evenness value therefore proves a morpho-diversity in  
620 samples of PZ 2 that is significantly higher than in PZ 3 and PZ 4. The evenness value of 0.71 for  
621 the entire seam is in accordance with the values of the individual samples (Table 2).

622

## 623 **Discussion**

624 Reconstructions of paleoenvironments from pollen assemblages in peat or coal are mainly based  
625 on studies of the relation between standing vegetation and pollen in surface peat samples. Among  
626 the numerous studies we prefer to rely on case studies from the coastal plains of the southeastern  
627 United States (e.g., [93-95]) which we consider to be rather similar to our example with regard to  
628 climate and geologic setting. These studies show that each plant community leaves a distinctive  
629 fingerprint in the pollen and spore assemblages of the corresponding peat substrate, although the  
630 relationship is not proportional and varies depending f.i. on differences in pollen production,  
631 pollination type and preservation potential. The following reconstructions commonly refer to the  
632 results of these studies.

## 633 **Reconstruction of the paleoenvironment**

634 The NMDS of all three sections show a distinctive threefold succession of vegetation during  
635 formation of Seam 1 (Figs 5-7): an initial (PZ 2), a transitional (PZ 3) and a terminal stage (PZ  
636 4). Such tripartite divisions have previously been described and interpreted in terms of  
637 environment and vegetation from the Carboniferous of Britain [96-98] and may be a general  
638 feature of paralic coals. Mechanisms controlling facies and environment during transgression and  
639 regression in peat forming paralic domains have recently been reviewed [99]. Seam 1 is bordered  
640 by interbeds I (PZ 1) and II (PZ 5), both showing marine influence and being largely separated  
641 from the PZs 2 to 4 in the NMDS of the total data set (Fig 13). Thus in total the following four  
642 different types of peat depositional environments and associated vegetation can be distinguished  
643 in the three sections: (1) a coastal vegetation (PZ 1 and PZ 5), (2) an initial mire (PZ 2), (3) a  
644 transitional mire (PZ 3) and (4) a terminal mire (PZ 4). They remained unaffected by the onset of  
645 a warming event at the top of the seam [27] and may therefore be considered as representing  
646 plant associations typical for a mid-latitude lowland vegetation during the early Eocene climatic  
647 background.

648

649 **Fig 13. Non-metric multidimensional scaling (NMDS) scatter plots of 56 samples from**  
650 **sections N, S1 and S2.** (A) Arrangement of samples (B) Arrangement of palynomorph taxa  
651 (stars). The colored dots and diamonds indicate the position of the samples presented in (A). For  
652 calculation the Bray-Curtis dissimilarity and Wisconsin double standardized raw-data values  
653 have been used.

654

## 655 Coastal vegetation (PZ 1, PZ 5)

656 Sandwiched between two marine-influenced interbeds Seam 1 was deposited between a  
657 regressive phase represented by PZ 1 (top of Interbed 1) and a transgressive phase represented by  
658 PZ 5 (base of Interbed 2). The NMDS of the total data set (Fig 13A) shows that samples of PZ 1  
659 and PZ 5 are largely separated from most of the samples of Seam 1 in the ordination space but  
660 plot together with some samples of PZ 2. This indicates that both marine influenced PZs include  
661 elements of the peat-forming mire vegetation.

662 The dominance of *Inaperturopollenites* spp. in PZ 1 and PZ 5 shows that Cupressaceae  
663 s.l. played an important role in the coastal vegetation. Together with *Nyssapollenites*, fairly  
664 common in the succeeding PZ 2, they indicate that a *Nyssa-Taxodium* swamp forest bordered the  
665 coastline at Schöningen and shed the largely wind-driven pollen load into the adjacent estuary.  
666 This type of swamp community presently exists in the warm-temperate coastal plains of eastern  
667 North America [100,101]. It has originally been used as a model for the succession of the peat-  
668 forming vegetation in the Miocene Lower Rhine Lignite [102,103] but has later been extended to  
669 lignites from other sites of Cenozoic age in Europe [40,104-107]. Since recent *Taxodium-Nyssa*  
670 swamp forests are common in inland riverine environments [100,101], their proximity to an  
671 estuary at Schöningen appears rather unusual. No particular sedimentological evidence pertaining  
672 to a *Nyssa-Taxodium* swamp has been observed in the three sections, but is, however, not  
673 expected in a forest derived and intensely rooted peat. Associated elements are *Plicatopollis*  
674 spp., *Tricolporopollenites liblarensis* and *Plicatopollis pseudoexcelsus*. The latter has been  
675 interpreted as a back-mangrove element associated with marsh elements in the middle Eocene  
676 Helmstedt Formation [24,108,109]. The anemophilous *Plicatopollis* spp. and *T. liblarensis* as  
677 well as the very thin-walled *Inaperturopollenites* spp. are also likely to be derived from nearby  
678 external sources such as the background mire forest (Fig 14 A).

679

680 **Fig 14. Paleoenvironment reconstruction for Seam 1.** Four different types of  
681 paleoenvironment and vegetation can be distinguished in the three sections N, S1 and S2. From  
682 base to top: (A) a coastal vegetation (PZ 1 and PZ 5) (B) an initial mire (PZ 2) (C) a transitional  
683 mire (PZ 3) (D) a terminal mire (PZ 4). The positions of the three studied sections (N, S1, S2)  
684 relative to the coast are indicated by colored bars.

685

686 Except for scattered occurrences of putative *Rhizophora* (Fig 14A) true mangrove pollen  
687 as characterizing the coastal vegetation of the middle Eocene Helmstedt Formation together with  
688 *Avicennia* and *Nypa* [24-26,108], is completely missing in the Schöningen Formation [25,27].  
689 Instead, *Pistillipollenites mcgregorii* and *Thomsonipollis magnificus* (both of unknown botanical  
690 affinity) may have substituted here for mangrove elements [25]. Since *T. magnificus* occurs  
691 regularly in PZ 1 and 5 in sections S1 and S2 and is very abundant in PZ 2a in section N, where  
692 *P. mcgregorii* also occurs at least in low numbers, the parent plants of both taxa were probably  
693 common in the immediate coastal vegetation during the deposition of the lower part of the  
694 Schöningen Formation.

695 Finally, cuticle fragments which are abundant in both, PZ 1 and PZ 5, may have had their  
696 source in the coastal vegetation and were concentrated along the shoreline by winnowing [90,91].

### 697 **Initial mire (PZ 2)**

698 At the onset of Seam 1 palynomorph assemblages combined in PZ 2 indicate a trend in the  
699 vegetation that started in PZ 1 and passes into PZ 3. As shown by the NMDS samples of PZ 2 are  
700 plotted together on the negative side of axis 1 in the ordination space (Fig 13A). However, there  
701 is little separation from the samples of PZ 1 and PZ 5 and an overlap with samples from the  
702 following PZ 3.

703 The abundance of *Inaperturopollenites* spp. (Cupressaceae s.l.) and the common  
704 occurrence of *Nyssapollenites* spp. (Nyssaceae) on either side of the interbed/seam boundary  
705 support the existence of a *Nyssa/Taxodium* swamp forest in the immediate vicinity of the  
706 coastline. This swamp forest may have been locally replaced by or mixed with patches of other  
707 elements, such as the parent plant of *Plicapollis pseudoexcelsus* (base of PZ 2 in section N and  
708 S1, Figs 5 and 6), a characteristic element of transitional marine/terrestrial environments of  
709 possible juglandaceous affinity [24,108,109]. *Thomsonipollenites magnificus* is quite abundant in  
710 section N (PZ 2a) in contrast to the other two sections.

711 In particular, *Alnipollenites verus* (*Alnus*) is common to frequent throughout PZ 2 and  
712 even highly dominant in some samples of section N (e.g., N4, Fig 5) and S2 (e.g., S2-a2, Fig 7).  
713 For these sites temporarily inundated freshwater wetland habitats may be envisioned similar to  
714 those in which modern species of *Alnus* such as e.g. *A. glutinosa* [110], *A. incana* [111] or *A.*  
715 *viridis* [112] grow today. Intermittent open fern meadows are indicated by the strong proliferation  
716 of trilete spores at the base of PZ 2 in section N. Notably, these spores are absent in the other two  
717 sections. Other common associates of PZ 2 assemblages such as *Monocolpopollenites tranquillus*  
718 (*Arecaceae*, *Phoenix*), *Plicatopollis* spp., and *Tricolpopollenites liblarensis* may have been in part  
719 indigenous to PZ 2, but they are small and thin-walled and therefore considered to be  
720 anemophilous [41] and likely to be introduced from other sources.

721 Local differences shown in the three sections are a special feature of PZ 2 indicating a  
722 pronounced patchiness in the initial mire vegetation (Fig 14B). This may be due to a number of  
723 variables controlling the structure of mire vegetation such as minute relief in the sub-peat  
724 topography [113,114], the water quality (salinity, nutrient load) or different dispersal strategies  
725 and competition among plants or other localized disturbances interrupting directional successions  
726 [115] which together result in differential peat aggradation [116].

727 This is also reflected in the striking contrast between subzones PZ 2a and PZ 2b in  
728 sections N and S2. Notable is, for instance, the replacement of fern spores (*Leiotriletes* spp.) in  
729 section S2 by pollen of woody plants such as *Tricolporopollenites belgicus* (Fig 7). The change  
730 from a herbaceous vegetation rich in ferns in PZ 2a to a more woody vegetation in PZ 2b is even  
731 reflected in the distribution of non-palynomorph organic remains showing an increase of  
732 periderm cells, phlobaphinites and resin particles as well as fungal remains from PZ 2a to PZ 2b  
733 (Fig 11).

### 734 **Transitional mire (PZ 3)**

735 The change in vegetation occurring within PZ 3 is gradual. In the course of peat aggradation  
736 previously dominant elements such as *Alnipollenites verus* (*Alnus*) or *Inaperturopollenites* spp.  
737 (Cupressaceae s.l.) are replaced by taxa such as *Pompeckjoidaepollenites subhercynicus* as well  
738 as *Sphagnum*-type spores. The latter two become eventually dominant in the succeeding PZ 4  
739 thus indicating the transitional character of this pollen zone and a reduction of (temporally)  
740 flooded habitats.

741 Accordingly, the samples of PZ 3 plot midway between those of the clearly separated PZ  
742 2 and PZ 4 in the ordination space of the NMDS of the total data set (Fig 13A). There are,  
743 however, considerable areas of overlap with both PZs which characterize PZ 3 as transitional  
744 between the initial and the terminal phases in the formation of Seam 1. The PZ 3 samples of  
745 section S2 differ from those of the other two sections since they plot separate to the left on the  
746 negative side of axis 1 (Fig 13A). This is due to the fact that the similarity of samples from S2 to  
747 those of PZ 2 is closer than in the other two sections, which are more transitional to PZ 4.

748 *P. subhercynicus* (unknown botanical affinity) and the *T. robustus/rhenanus* group pollen  
749 (Myricaceae) are widely distributed throughout the Schöningen Formation and are often  
750 dominant in the upper part of the lower seams (Main Seam, Seam 1 and Seam 2 [27]). *P.*

751 *subhercynicus* is more restricted to certain levels and appears to prefer mire forest/marsh  
752 interfaces (ecotones) [24,26]. The *T. robustus/rhenanus* group is locally abundant in PZ 3 and  
753 even dominant in section N before becoming dominant throughout PZ 4. Noteworthy are the first  
754 peaks of *Sphagnum*-type spores indicating an initial tendency for ombrogenous bogs to develop  
755 under the open canopy of an angiosperm mire forest (Fig 14C).

756 Sample 5 of section S1 is clearly separated from all other samples in this section in the  
757 NMDS (Figs 6C, 13) by the dominance of peat moss and fern spores (*Sphagnum*-type spores,  
758 *Laevigatosporites* spp., *Leiotriletes* spp.) together with a mass occurrence of charcoal particles.  
759 The sample was taken from a layer (X-Horizon), which included tree-stumps as well as a  
760 charcoal horizon (Figs 4 and 6). Possibly, tree fall and/or forest fire may have left a clearing here,  
761 which was resettled by ferns and mosses as pioneers [117].

762

#### 763 **Terminal mire (PZ 4)**

764 A very marked change in palynomorph assemblage composition occurs at the transition from PZ  
765 3 to PZ 4. This is mainly due to the rise to dominance of *Sphagnum*-type spores including all  
766 three genera previously observed in seams of the Schöningen Formation, i.e. *Sphagnumsporites*,  
767 *Tripunctisporis* and *Distancorisporis* [44,89]. Although the latter two are morphologically  
768 different from modern *Sphagnum* spores the three genera are sufficiently similar and closely  
769 associated with remains of *Sphagnum* (leaves) in a thin lignite seam (*Sphagnum* Seam) higher up  
770 in the Schöningen section to confirm their affinity to *Sphagnum* [25,44,89].

771 The change in PZ 4 is underscored by the great increase in pollen of the *T.*  
772 *robustus/rhenanus* group. Although some of these changes are already initiated in section N (for  
773 *T. robustus/rhenanus*) and section S1 (for *Sphagnum*-type spores), the NMDS of all three

774 sections (Figs 5C, 6C, 7C) and of the total data set (Fig 13A) show a clear separation of PZ 4  
775 samples from those of all other PZs.

776 A number of authors have affiliated *T. robustus* with various, mostly catkin-bearing  
777 families. But on the basis of surface features visible at high resolution ([118,119], personal SEM  
778 observation) we favour an affinity with the Myricaceae, a family today represented mostly by  
779 small trees and shrubs adapted to wet acidic environments and nutrient deficiency [120,121].  
780 Together with *Sphagnum* they clearly signal that peatbeds in PZ 4 were decoupled from  
781 groundwater (raised bog) and their hydrology increasingly, but not exclusively controlled by  
782 precipitation since freshwater runoff was backed up by the rise of sea level [122-124] (Fig 14D).  
783 The increase of *Ericipites* sp. (Ericaceae) and *Milfordia* spp. (Restionaceae) in section S1 is fully  
784 in line with this development. In particular, Restionaceae have been described as an important  
785 constituent of the so-called *Sphagnum* Seam at Schöningen which has been compared with recent  
786 southern hemisphere restionad bogs [44]. Pools of standing water are a common feature of  
787 terminal mires [125-127] and indicated here by the rare, but regular occurrence of remains of  
788 freshwater algae such as cysts of Zygnemataceae (Fig 14D).

789 Somewhat intriguing are certain members of the Normapolles such as *Basopollis* and  
790 *Nudopollis*, relics from the Cretaceous, the occurrence of which is one of the last in the  
791 Paleogene of Central Europe and largely restricted here to PZ 4. Their parent plants seem to have  
792 found refuge within the vegetation and environment of PZ 4 just prior to their extinction. The  
793 association of *Basopollis orthobasalis*, f.i., with pollen of Myricaceae indicates that the parent  
794 plants of Normapolles favored the nutrient deficient conditions of the terminal mire of PZ 4  
795 [128].

796 The multiple evidence of waterlogged conditions and standing water, however, seems  
797 counterintuitive to the massive occurrence of charcoal particles (Fig 11). Since they often show



798 bordered pits, they are mostly wood derived and, thus, clearly differing from the charcoal of the  
799 herb-dominated early Eocene *Sphagnum* bog at Schöningen [44]. This apparent contradiction  
800 may be resolved in three ways: by close lateral proximity of burnt and waterlogged to aquatic  
801 sites, by crown fires in a temporarily flooded mire forest or by periodic drought followed by  
802 flooding and resettlement of burned forest sites. As a possible modern equivalent for the latter we  
803 consider the complex fire regime in the Okefenokee Swamp (Georgia, USA) [129], where  
804 periodic forest fires at approximately 25 year intervals left charcoal horizons and lowered the  
805 peat surface thus creating space for ponds or lakes when water level returned to normal  
806 [130,131]. New peat was deposited after each fire [132]. In PZ 4 of Seam 1 new peat was formed  
807 among others by regrowth of *Sphagnum*, ferns, Restionaceae (section S1), and shrubs  
808 (Myricaceae, Betulaceae, Juglandaceae).

809

## 810 **Comparison of palynomorph assemblages between sections N, S1, S2**

811 The abundance values of common taxa are averaged for the five PZ's in each of the three sections  
812 and juxtaposed in Fig 15, in order to show the differences between sections as opposed to the  
813 vertical succession of pollen assemblages. A gradient from the most seaward (section N) to the  
814 furthest inland section (section S2) becomes evident for several taxa, which appear to be  
815 environmentally sensitive.

816

817 **Fig 15. Average abundance of important palynomorph taxa in the different palynozones of**  
818 **the three sections of Seam 1.** Average values are presented in percent for each of the PZs. The  
819 three sections are arranged from top to bottom away from the coastline.

820

821           Thus, taxa, which have previously been found in association with marine influence, are  
822 best represented in section N. *Thomsonipollis magnificus*, for example, has been considered to  
823 substitute for the true mangrove elements in various sections at Helmstedt and Schöningen, while  
824 *Pompeckjoidaepollenites subhercynicus* appears to be an important constituent of the back-  
825 mangrove ecotone [24,25,108]. *Nyssa* (*Nyssapollenites kruschii*) and *Taxodium*  
826 (*Inaperturopollenites* sp. partim) are most tolerant of standing freshwater among trees and, thus,  
827 are likely to have formed stands in adjacent backwater areas. The small tricolp(or)ate taxa  
828 (*Tricolpopollenites liblarensis*, *Tricolporopollenites cingulum*) may be considered to be wind-  
829 driven from more inland mire sites and proportionately overrepresented as other elements  
830 decline closer to the shore.

831           Corresponding to the successional upward increase there is also a landward increase in the  
832 abundance of Sphagnum-type spores indicating the initiation of Sphagnum peat bogs in more  
833 inland sites. Moreover, the diagram (Fig 15) indicates that they may have been first developed in  
834 the most landward site, where they occur already in PZ 3. A similar trend of abundance increases  
835 towards more inland sites is shown by pollen of Myricaceae (*T. robustus/rhenanus* group),  
836 Restionaceae (*Milfordia* spp.) and Normapolles (*Basopollis*, unknown botanical affinity), in part  
837 also for Juglandaceae (*Momipites punctatus*).

838           Fern spores (*Leiotriletes*, *Laevigatosporites*) as well as *Alnipollenites* (*Alnus*) and to some  
839 extent *Tricolpopollenite belgicus* show no clear pattern and are characterized by strong frequency  
840 fluctuations in the three sections, which agrees well with their potential role as invaders of locally  
841 disturbed sites.

842           Overall, it should be noted that, despite the differences between the three sections,  
843 differences in the quantitative composition of pollen assemblages are significantly more  
844 pronounced between successional stages as represented by the pollen zones. Thus, the five pollen

845 zones distinguished here are a robust fingerprint of the successional stages of vegetation, under  
846 which Seam 1 has been formed.

847

## 848 **Diversity**

849 The study of the morpho-diversity of the pollen assemblages in section S1 allows for an estimate  
850 of the diversity of the vegetation, assuming that the pollen rain reflects relative changes within  
851 the vegetation [77,80]. 179 palynomorph species have been recognized in Seam 1, but gamma  
852 diversity calculation shows that more than 200 species can be expected (Fig 12C, Table 2). Thus,  
853 the diversity is higher than reported for other lower Eocene records, especially those in Central  
854 Europe such as Krappfeld (Carinthia, Austria) [133,134], Epinois (Belgium) [56] or the Cobham  
855 Lignite (southern England) [22] and calculated for North America (Mississippi, Alabama)  
856 [135,136]. However, the calculations may be based on different taxonomic resolution and should  
857 therefore be considered with caution. In any case, the diversity measures of Seam 1 reflect a high  
858 plant diversity as typical for forested tropical coastal wetlands and peatlands [137].

859 Point and alpha diversities of PZ 2 in section S1 are significantly higher than in the other  
860 PZs in S1 (Figs 12A and 12B). This high morpho-diversity of the microflora in PZ 2 is rather  
861 striking, but not surprising when PZ 2 is considered to represent an ecotone between PZ 1 and PZ  
862 3 combining elements from the coastal vegetation and the subsequent initial mire forest.  
863 Furthermore, an initial mire forest, as represented in PZ 2 is in any case highly diverse compared  
864 to a disturbed terminal mire vegetation with raised bog that follows later in PZ 4 [137]. With the  
865 initiation of a *Sphagnum* bog in PZ 4 a peat swamp developed that became increasingly  
866 oligotrophic supporting plant communities that are adapted to low pH and nutrient depletion and

867 which are low in diversity [138]. Accordingly alpha diversities of PZs 3 and 4 are significantly  
868 lower than in PZ 2 (Fig 12B).

869 Point diversity increases again in the uppermost sample of PZ 4 (Fig 12A) immediately  
870 prior to the transgression of Interbed 2, where species-rich back swamp and coastal communities  
871 returned to the site. The exceptionally low point diversity and evenness of sample S1-5 (X-  
872 horizon) is due to the dominance of spores and the concomitant decline of other elements (Fig  
873 12A, Table 1) possibly caused by resettlement of a clearing in the mire forest by ferns and  
874 mosses.

875

## 876 **Paleoclimate**

877 Isotope analyses have recently shown that a Carbon Isotope Excursion (CIE) indicates a short-  
878 term thermal event that started with the topmost sample of Seam 1 extending into the lower part  
879 of Seam 2 [27]. Nevertheless, the bulk of Seam 1 was deposited during a moderately warm  
880 period of the lower Eocene as suggested below. However, temperature reconstructions for Seam  
881 1 based on biomarker analysis (brGDGTs) resulted in high mean annual temperatures (MAT),  
882 which reached  $24^{\circ}\text{C} \pm 4.6^{\circ}\text{C}$  in the lower part of the seam [139]. Therefore, a thermophilic  
883 vegetation should be expected similar to other sites along the southern coast of the Proto-North  
884 Sea such as Cobham (southern England) and Vasterival (France) which included the PETM  
885 [22,23].

886 We present evidence here that the vegetation of Seam 1 indicates a cooler mesothermal  
887 climate. True humid tropical mangrove elements such as *Avicennia* and *Nypa*, common in the  
888 coastal vegetation of the succeeding middle Eocene Helmstedt Formation [24,108], are absent.  
889 This suggests at least extratropical conditions for the Schöningen Formation [25]. On the other

890 hand, *Alnus*, one of the characteristic elements of PZ 2 does not occur in the PETM records of the  
891 Cobham lignite and Vasterival [22,23]. The assemblages of PZ 2 are more compatible with high-  
892 latitude Eocene swamp forests such as those on Axel Heidberg Island in the Canadian High  
893 Arctic, where Cupressaceae s.l. and *Alnus* are widely distributed [140]. A similar microflora is  
894 also known from the Paleocene/Eocene boundary in the central North Sea [141], where the  
895 vegetation is composed of a mixture of azonal and zonal elements including mesothermal  
896 conifers (Cupressaceae s.l.) and dicots such as *Alnus*, *Carya* and *Juglans* indicating a mixed  
897 conifer broadleaf vegetation [141]. Temperature reconstructions for this record based on  
898 comparisons with nearest living relatives (NLR) indicate relatively cool mean annual  
899 temperatures (MAT) of 15° C and cold month mean temperatures (CMMT) of 8° C but warm  
900 month mean temperatures (WMMT) of 22.5° C for the North Sea region [141]. The similarly  
901 composed mixed palynomorph assemblages of PZ 2, in particular the high abundance of *Alnus*  
902 pollen, would, therefore, suggest similar extratropical conditions for Seam 1. This is a  
903 considerably cooler estimate than that based on biomarker analysis notwithstanding the  
904 resemblance of WMMT estimates. However, this may be explained by the fact that a certain  
905 temperature bias between brGDGTs estimates and those from leaves and palynomorphs is well  
906 known [141,142].

907 Our results are consistent with data for the Bighorn Basin in North America where the  
908 thermal event of the PETM is followed by a strong temperature decline in the first million years  
909 of the Eocene, shortly before the rapid increase of temperatures during the succeeding EECO  
910 followed [143]. Seam 1 has been deposited in the lowermost Eocene during a phase following the  
911 PETM and before a lower Eocene thermal event in the succeeding Interbed 2 and Seam 2  
912 appeared [27]. Thus, a simultaneous cooling in the continental climate of North America and  
913 Central Europe is indicated.

914           Although *Alnus* as a temperate climate element declines in PZ 2 and PZ 3 extratropical  
915 conditions seem to have persisted through PZ 3 and PZ 4 since *Sphagnum* and fern spores in  
916 association with pollen of Restionaceae and Ericaceae dominate [25,44]. They are typical for  
917 temperate mires in the southern hemisphere today [144-149]. In the northern hemisphere similar  
918 pollen assemblages are also known from Paleocene to lower Eocene coals of Texas and  
919 Wyoming [150].

920           The close association of *Sphagnum* and fern spores with high abundances of charcoal in  
921 PZ 3 and PZ 4 (Fig 11) appears rather contradictory and has been interpreted in a number of  
922 ways. In any case, the great increase in charcoal points to an increase in fire activity and possibly  
923 to dryer conditions in the area toward the end of Seam 1 formation. In a recent study of charcoals  
924 from 11 autochthonous lignite seams from the Schöningen and Helmstedt formations, including  
925 Seam 1, a mix of charcoal particle sizes from >500  $\mu\text{m}$  to less than 10  $\mu\text{m}$  has been recognized  
926 [28], which indicates local and regional wildfire activity [151-154]. Especially larger charcoal  
927 particles ( $\geq 500 \mu\text{m}$ ) in the autochthonous early Paleogene lignites at Schöningen, such as Seam 1,  
928 are unlikely to have been washed in and therefore represent locally occurring wildfires [28].  
929 Semifusinite and inertodetrinite are the most common inertinite macerals in the lignite. Since  
930 inertodetrinite is predominantly wind-blown due to its small size [155], it can be used as an  
931 indicator of local and regional high temperature crown fire activity [154-156].

932           Inglis et al. [89] argued that wildfires impeded the spread of taller and more vulnerable  
933 vascular plants and thereby advanced the spread of *Sphagnum*. On the other hand, the highest  
934 abundance of charcoal at the top of PZ 4 (Fig 11) may be correlated with the onset of a CIE [27]  
935 considering that an increase of wildfires shortly before the onset of the PETM has been noted for  
936 the Cobham lignite [22,157]. This could give support to the suggestion that peat burning may  
937 have been a trigger for CIEs and associated thermal events in the early Paleogene [158,159].

938 However, we favor the Okefenokee Swamp (Georgia, USA) as a recent example for conditions  
939 existing during PZ 4, in which periodic droughts and subsequent forest fires leave open areas  
940 later invaded by a herbaceous vegetation consisting of *Sphagnum*, ferns, Restionaceae and  
941 Ericaceae with aquatic sites in between [160].

942

## 943 **Conclusions**

944 Statistical scrutiny by means of Cluster analyses and NMDS shows that 5 different PZs occurring  
945 in vertical succession can be clearly distinguished in the three sections of Seam 1 despite local  
946 differences between them. They reflect vegetation responses to changes in environment and  
947 facies that took place during an early Paleogene regression/transgression cycle including the  
948 formation of a coal seam. The two PZs bounding the seam, PZ 1 and PZ 5, are similar mainly due  
949 to the presence of marine indicators (*Apectodinium*, *Rhizophora*) and reflect the state of  
950 vegetation during the regressional respectively transgressional phase. PZ 2 to PZ 4 reflect  
951 changes occurring during coal seam respectively peat bed formation, in which the various mire  
952 communities competed for changing hydrologic conditions, nutrient resources and effects of peat  
953 aggradation. The initial phase (PZ 2) was characterized by a patchy, pioneering vegetation (e.g.  
954 *Thomsonipollis magnificus*, *Alnipollenites verus*) controlled by variable edaphic conditions. PZ 3  
955 appears transitional in a seam of limited thickness, but represents a certain climax in mire  
956 development since it is composed of a mix of species adapted to these conditions. External  
957 factors such as fire, flooding and an increasing influence of precipitation led to environmental  
958 disturbances and differential peat aggradation supporting a rather heterogeneous vegetation of  
959 *Sphagnum*, ferns, and Myricaceae in combination with frequent charcoal (PZ 4) during the  
960 terminal phase. A renewed transgression finally truncated further peat aggradation preventing full

961 development of ombrogenous conditions which commonly constitute the bulk of thick seams as  
962 described for brown coals of Victoria, Australia [107].

963 Diversity measurements show that PZ 2 has the greatest species diversity as is commonly  
964 the case in ecotones containing elements from adjacent communities as well as specialists of  
965 different habitats. Since they disappear with progressive stabilization of the mire environment,  
966 diversity drops to the lowest in PZ 3, before disturbances in the environment create new habitats  
967 in PZ 4. This pattern may be considered typical of vegetation responses in  
968 regression/transgression cycles.

969 Climatic signals for Seam 1 are somewhat contradictory. Warm temperatures of *c.* 24 °C  
970 have been calculated by biomarker analyses of Seam 1 approaching those accepted for the PETM  
971 [139]. Isotope analyses [27], on the other hand, have shown that Seam 1 has been formed just  
972 prior to a negative CIE excursion. There is strong palynological evidence from Seam 1 that a  
973 temperate climate prevailed in northwestern Germany during the lowermost lower Eocene, since  
974 *Alnus* and *Sphagnum* are abundant temperate elements in Seam 1, while tropical elements, e.g.  
975 *Avicennia*, *Nypa* and *Sapotaceae*, well known from the middle Eocene Helmstedt Formation, are  
976 entirely missing. Seam 1, therefore, stands as an example typical for the normal climate during  
977 the early Eocene. As such it will serve as a standard by which vegetation responses to any of the  
978 known early Eocene thermal events can be identified in the Schöningen section.

979

## 980 **Acknowledgements and funding**

981 The authors thank Karin Schmidt for valuable field support and technical assistance. We are also  
982 grateful to the Helmstedt Revier GmbH (formerly BKB and later EoN) for access to the sections



983 and technical support in the field. We thank 2 anonymous referees for their reviews and  
984 comments that helped to improve the manuscript significantly.

985

## 986 **References**

- 987 1. Zachos JC, Pagani M, Sloan L, Thomas E, Billups K. Trends, rhythms, and aberrations in  
988 global climate 65 Ma to present. *Science* 2001; 292: 686–693.
- 989 2. Kennett JP, Stott LD. Abrupt deep-sea warming, palaeoceanographic changes and benthic  
990 extinctions at the end of the Palaeocene. *Nature* 1991; 353: 225–229.
- 991 3. Bains S, Norris RD, Corfield RM, Faul KL. Termination of global warmth at the  
992 Palaeocene/Eocene boundary through productivity feedback. *Nature* 2000; 407: 171–174.
- 993 4. Röhl U, Bralower TJ, Norris RD, Wefer G. New chronology for the late Paleocene thermal  
994 maximum and its environmental implications. *Geology* 2000; 28: 927–930.
- 995 5. Röhl U, Westerhold T, Bralower TJ, Zachos JC. On the duration of the Paleocene-Eocene  
996 thermal maximum (PETM). *Geochemistry, Geophysics, Geosystems* 2007; 8: Q12002.  
997 doi:10.1029/2007GC001784, 2007.
- 998 6. Westerhold T, Röhl U, Frederichs T, Agnini C, Raffi I, Zachos JC, et al. Astronomical  
999 calibration of the Ypresian timescale: Implications for seafloor spreading rates and the chaotic  
1000 behaviour of the solar system? *Climate of the Past* 2017; 13: 1129–1152.
- 1001 7. Zeebe RE, Lourens LJ. Solar System chaos and the Paleocene–Eocene boundary age  
1002 constrained by geology and astronomy. *Science* 2019; 365: 926–929.
- 1003 8. Lourens LJ, Sluijs A, Kroon D, Zachos JC, Thomas E, Röhl U, et al. Astronomical pacing of  
1004 late Palaeocene to early Eocene global warming events. *Nature* 2005; 235: 1083–1087.

- 1005 9. Sluijs A, Schouten S, Donders T., Schoon PL, Röhl U, Reichart GJ, et al. Warm and wet  
1006 conditions in the Arctic region during Eocene Thermal Maximum 2. *Nature Geosciences*  
1007 2009; 2: 777–780.
- 1008 10. Cramer BS, Wright JD, Kent DV, Aubry MP. Orbital climate forcing of  $\delta^{13}\text{C}$  excursions  
1009 in the late Paleocene–early Eocene (chrons C24n-C25n). *Paleoceanography* 2003; 18: 1097.  
1010 doi:[10.1029/2003PA000909](https://doi.org/10.1029/2003PA000909).
- 1011 11. Röhl U, Westerhold T, Monechi S, Thomas E, Zachos JC, Donner B. The Third and Final  
1012 Early Eocene Thermal Maximum: Characteristics, Timing and Mechanisms of the “X” Event.  
1013 *Geological Society of America, Abstracts with Programs*. 2005; 37: 264.
- 1014 12. Zachos JC, Wara MW, Bohaty S, Delaney ML, Petrizzo MR, Brill, A., et al. A transient  
1015 rise in tropical sea surface temperature during the Paleocene-Eocene thermal maximum.  
1016 *Science* 2003; 302: 1551–1554.
- 1017 13. Zachos JC, Dickens GR, Zeebe RE. An early Cenozoic perspective on greenhouse  
1018 warming and carbon-cycle dynamics. *Nature* 2008; 451: 279–283.
- 1019 14. Zachos JC, McCarren H, Murphy B, Röhl U, Westerhold T. Tempo and scale of late  
1020 Paleocene and early Eocene carbon isotope cycles: Implications for the origin of  
1021 hyperthermals. *Earth and Planetary Science Letters* 2010; 299: 242–249.
- 1022 15. Sluijs A, Dickens GR. Assessing offsets between the  $\delta^{13}\text{C}$  of sedimentary components  
1023 and the global exogenic carbon pool across early Paleogene carbon cycle perturbations. *Global*  
1024 *Biogeochemical Cycles* 2012; 26. GB4005, <https://doi.org/10.1029/2011GB004224>.
- 1025 16. Dickens GR. Carbon addition and removal during the Late Palaeocene Thermal  
1026 Maximum: Basic theory with a preliminary treatment of the isotope record at ODP Site 1051,  
1027 Blake Nose. *Geological Society London Special Publications* 2001; 183: 293–305.

- 1028 17. Turner SK, Sexton P, Charles CD, Norris RD. Persistence of carbon release events  
1029 through the peak of early Eocene global warmth. *Nature Geosciences* 2014; 7: 748–751.
- 1030 18. Clyde WC, Gingerich PD. Mammalian community response to the latest Paleocene  
1031 thermal maximum: An isotaphonomic study in the northern Bighorn Basin, Wyoming.  
1032 *Geology* 1998; 26: 1011–1014.
- 1033 19. Bowen GJ, Clyde WC, Koch PL, Ting S, Alroy J, Tsubamoto T, et al. Mammalian  
1034 dispersal at the Paleocene/Eocene boundary. *Science* 2002; 295: 2062–2065.
- 1035 20. Jaramillo C, Ochoa D, Contreras L, Pagani M, Carvajal-Ortiz H, Pratt LM, et al. Effects  
1036 of rapid global warming at the Paleocene-Eocene Boundary on Neotropical Vegetation.  
1037 *Science* 2010; 330: 957–961.
- 1038 21. Wing SL, Currano ED. Plant response to a global greenhouse event 56 million years ago.  
1039 *American Journal of Botany* 2013; 100: 1234–1254.
- 1040 22. Collinson ME, Steart DC, Harrington GJ, Hooker JJ, Scott AC, Allen LO, et al.  
1041 Palynological evidence of vegetation dynamics in response to palaeoenvironmental change  
1042 across the onset of the Paleocene-Eocene Thermal Maximum at Cobham, Southern England.  
1043 *Grana* 2009; 48: 38–66.
- 1044 23. Garel S, Schnyder J, Jacob J, Dupuis C, Boussafir M, Le Milbeau C, et al.  
1045 Paleohydrological and paleoenvironmental changes recorded in terrestrial sediments of the  
1046 Paleocene–Eocene boundary (Normandy, France). *Palaeogeography, Palaeoclimatology,*  
1047 *Palaeoecology* 2013; 376: 184–199.
- 1048 24. Lenz OK. Palynologie und Paläoökologie eines Küstenmoores aus dem Mittleren Eozän  
1049 Mitteleuropas-Die Wulfersdorfer Flözgruppe aus dem Tagebau Helmstedt, Niedersachsen,  
1050 *Palaeontographica B* 2005; 271: 1–157.

- 1051 25. Riegel W, Wilde V, Lenz OK. The Early Eocene of Schöningen (N-Germany) – an  
1052 interim report. *Austrian Journal of Earth Sciences* 2012; 105: 88–109.
- 1053 26. Riegel W, Lenz OK, Wilde V. From open estuary to meandering river in a greenhouse  
1054 world – An ecological case study from the Middle Eocene of Helmstedt, northern Germany.  
1055 *Palaios* 2015; 30: 304–326.
- 1056 27. Methner K, Lenz OK, Riegel W, Wilde V, Mulch A. Paleoenvironmental response of  
1057 midlatitudinal wetlands to Paleocene–early Eocene climate change (Schöningen lignite  
1058 deposits, Germany). *Climate of the Past* 2019; 15: 1741–1755.
- 1059 28. Robson BE, Collinson ME, Riegel W, Wilde V, Scott AC, Pancost RD. Early Paleogene  
1060 wildfires in peat-forming environments at Schöningen, Germany. *Palaeogeography,*  
1061 *Palaeoclimatology, Palaeoecology* 2015; 437: 53–62.
- 1062 29. Brandes C, Pollok L, Schmidt C, Wilde V, Winsemann J. Basin modelling of a lignite-  
1063 bearing salt rim syncline: insights into rim syncline evolution and salt diapirism in NW  
1064 Germany. *Basin Research* 2012; 24: doi: 10.1111/j.1365-2117.2012.00544x.
- 1065 30. Blumenstengel H, Krutzsch, W. Tertiär. In: Bachmann GH, Ehling BC, Eichner R,  
1066 Schwab M, editors. *Geologie von Sachsen-Anhalt*. Stuttgart: Schweizerbart; 2008. pp. 267–  
1067 273.
- 1068 31. Standke G. Paläogeografie des älteren Tertiärs (Paleozän bis Untermiozän) im  
1069 mitteldeutschen Raum. *Zeitschrift der Deutschen Gesellschaft für Geowissenschaften* 2008;  
1070 159: 81–103.
- 1071 32. Wilde V, Riegel W, Lenz OK. Das Paläogen im Helmstedter Revier: Ein  
1072 Forschungsthema im Geopark Harz. Braunschweiger Land. Ostfalen. *Gaussiana* 2020; 1:  
1073 Forthcoming.

- 1074 33. Ziegler PA. Geological Atlas of Western and Central Europe. The Hague: Shell  
1075 Internationale Petroleum Maatschappij B.V; 1990.
- 1076 34. Manger G. Der Zusammenhang von Salztektunik und Braunkohlenbildung bei der  
1077 Entstehung der Helmstedter Braunkohlenlagerstätten. Mitteilungen aus dem Geologischen  
1078 Staatsinstitut in Hamburg 1952; 21: 7–45.
- 1079 35. Baldschuhn R, Binot F, Fleig S, Kockel F. Geotektonischer Atlas von Nordwest-  
1080 Deutschland und dem deutschen Nordsee-Sektor. Geologisches Jahrbuch Reihe A 1996; 153:  
1081 1–88.
- 1082 36. Gramann F, Harre W, Kreuzer H, Look ER, Mattiat B. K-Ar ages of Eocene to Oligocene  
1083 glauconitic sands from Helmstedt and Lehrte (Northwestern Germany). Newsletter on  
1084 Stratigraphy 1975; 4: 71–86.
- 1085 37. Gürs K. Das Tertiär Nordwestdeutschlands in der Stratigraphischen Tabelle von  
1086 Deutschland 2002. Newsletters on Stratigraphy 2005; 41: 313–322.
- 1087 38. Ahrendt H, Köthe A, Lietzow A, Marheine D, Ritzkowski S. Lithostratigraphie,  
1088 Biostratigraphie und radiometrische Datierung des Unter-Eozäns von Helmstedt (SE-  
1089 Niedersachsen). Zeitschrift der Deutschen Geologischen Gesellschaft 1995; 146: 450–457.
- 1090 39. Köthe A. Dinozysten-Zonierung im Tertiär Norddeutschlands. Revue de Paléobiologie  
1091 2003; 22: 895–923.
- 1092 40. Pflug HD. Palynologie und Stratigraphie der eozänen Braunkohlen von Helmstedt.  
1093 Paläontologische Zeitschrift 1952; 26: 112–137.
- 1094 41. Pflug HD. Palyno-Stratigraphie des Eozän/Oligozän im Raum von Helmstedt, in  
1095 Nordhessen und im südlichen Anschlussbereich. In: Tobien H, editor. Nordwestdeutschland  
1096 im Tertiär. Beiträge zur Regionalen Geologie der Erde 18: Berlin, Stuttgart: Gebrüder  
1097 Borntraeger; 1986. pp. 567–582.

- 1098 42. Haq BU, Hardenbol J, Vail PR. Mesozoic and Cenozoic chronostratigraphy and cycles of  
1099 sea-level change. In: Wilgus CK, Hastings BS, Kendall CGSG, Posamentier HW, Ross CA,  
1100 Van Wagoner JC, editors. Sea-level changes: an integrated approach. Tulsa, USA: SEPM  
1101 (Society for Sedimentary Geology) Special Publication 42; 1988. pp. 71–108.
- 1102 43. Laskar J, Fienga A, Gastineau M, Manche H. La2010. A new orbital solution for the long  
1103 term motion of the Earth. *Astronomy & Astrophysics* 2011; 532, A89: 1–15.
- 1104 44. Riegel W, Wilde V. An early Eocene Sphagnum bog at Schöningen, northern Germany.  
1105 *International Journal of Coal Geology* 2016; 159: 57–70.
- 1106 45. Bujak JP, Brinkhuis H. Global warming and dinocyst changes across the  
1107 Paleocene/Eocene Epoch boundary. In: Aubry MP, Lucas SG, Berggren W, editors. Late  
1108 Paleocene–early Eocene climatic and biotic events in the marine and terrestrial records. New  
1109 York, USA: Columbia University Press; 1998. pp. 277–295.
- 1110 46. Crouch EM, Heilmann-Clausen C, Brinkhuis H, Morgans HE, Rogers KM, Egger H, et al.  
1111 Global dinoflagellate event associated with the late Paleocene thermal maximum. *Geology*  
1112 2001; 29: 315–318.
- 1113 47. Heilmann-Clausen C, Nielsen OB, Gersner F. Lithostratigraphy and depositional  
1114 environments in the Upper Paleocene and Eocene of Denmark, *Bulletin of the Geological*  
1115 *Society of Denmark*. 1985; 33: 287–323.
- 1116 48. Iakovleva AI, Brinkhuis H, Cavagnetto C. Late Palaeocene–Early Eocene dinoflagellate  
1117 cysts from the Turgay Strait, Kazakhstan; correlations across ancient seaways,  
1118 *Palaeogeography, Palaeoclimatology, Palaeoecology* 2001; 172: 243–268.
- 1119 49. Sluijs A, Brinkhuis, H. A dynamic climate and ecosystem state during the Paleocene-  
1120 Eocene Thermal Maximum: inferences from dinoflagellate cyst assemblages on the New  
1121 Jersey Shelf. *Biogeosciences* 2009; 6: 1755–1781.

- 1122 50. Sluijs A, Schouten S, Pagani M, Woltering M, Brinkhuis H, Damsté JSS, et al.  
1123 Subtropical Arctic Ocean temperatures during the Palaeocene/Eocene thermal maximum.  
1124 Nature 2006; 441: 610–613.
- 1125 51. Sluijs A, Brinkhuis H, Schouten S, Bohaty SM, John CM, Zachos JC, et al.  
1126 Environmental precursors to rapid light carbon injection at the Palaeocene/Eocene boundary.  
1127 Nature 2007; 450: 1218–1221.
- 1128 52. Williams GL, Damassa SP, Fensome RA, Guerstein GR. *Wetzelioella* and its allies — The  
1129 ‘Hole’ Story: A Taxonomic Revision of the Paleogene Dinoflagellate Subfamily  
1130 *Wetzelioelloideae*. *Palynology* 2015; 39: 289–344.
- 1131 53. Heilmann-Clausen C. Observations of the dinoflagellate *Wetzelioella* in Sparnacian facies  
1132 (Eocene) near Epernay, France, and a note on tricky acmes of *Apectodinium*. *Proceedings of*  
1133 *the Geologists’ Association*. 2018. <https://doi.org/10.1016/j.pgeola.2018.06.001>
- 1134 54. Kaiser ML, Ashraf R. Gewinnung und Präparation fossiler Pollen und Sporen sowie  
1135 anderer Palynomorphae unter besonderer Berücksichtigung der Siebmethode. *Geologisches*  
1136 *Jahrbuch* 1974; 25, 85–114.
- 1137 55. Thomson PW, Pflug H. Pollen und Sporen des mitteleuropäischen Tertiärs.  
1138 Gesamtübersicht über die stratigraphisch und paläontologisch wichtigen Formen.  
1139 *Palaeontographica B* 1953; 94: 1–138.
- 1140 56. Krutzsch W, Vanhoorne R. Die Pollenflora von Epinois und Loksbergen in Belgien.  
1141 *Palaeontographica B* 1977; 163: 1–110.
- 1142 57. Thiele-Pfeiffer H. Die Mikroflora aus dem mitteleozänen Ölschiefer von Messel bei  
1143 Darmstadt. *Palaeontographica B* 1988; 211: 1–86.
- 1144 58. Nickel B. Die mitteleozäne Mikroflora von Eckfeld bei Manderscheid/Eifel. *Mainzer*  
1145 *Naturwissenschaftliches Archiv Beiheft* 1996; 18: 1–121.

- 1146 59. ter Braak CJF, Looman CWN. Regression. In: Jongman RHG, Ter Braak CJF, Tongeren  
1147 OFR, editors. *Data Analysis in Community and Landscape Ecology*. Cambridge, UK:  
1148 Cambridge University Press; 1995. pp. 29–77.
- 1149 60. Juggins S. C2 Software for ecological and palaeoecological data analysis and  
1150 visualization. User Guide Version, 1.5. Newcastle upon Tyne: Newcastle University; 2007.
- 1151 61. Lenz OK, Wilde V. Changes in Eocene plant diversity and composition of vegetation: the  
1152 lacustrine archive of Messel (Germany). *Paleobiology* 2018; 44: 709–735.
- 1153 62. Moshayedi M, Lenz OK, Wilde V, Hinderer M. The recolonization of volcanically  
1154 disturbed Eocene habitats of Central Europe: The maar lakes of Messel and Offenthal (SW  
1155 Germany) compared. *Palaeobiodiversity and Palaeoenvironments* 2020. doi: 10.1007/s12549-  
1156 020-00425-4.
- 1157 63. Bray JR, Curtis JT. An ordination of the upland forest communities of southern  
1158 Wisconsin. *Ecological Monographs* 1957; 27: 325–349.
- 1159 64. Cottam G, Goff FG, Whittaker RH. Wisconsin Comparative Ordination. In: Whittaker  
1160 RH, editor. *Ordination of Plant Communities*. Handbook of Vegetation Science 5-2.  
1161 Dordrecht: Springer; 1978. pp. 185–213.
- 1162 65. Gauch HG, Scruggs WM. Variants of polar ordination. *Vegetatio* 1979; 40: 147–153.
- 1163 66. Oksanen J. *Multivariate Analysis of Ecological Communities in R*. 2005 [cited 2020  
1164 September 10]. Available from:  
1165 [http://ubio.bioinfo.cnio.es/Cursos/CEU\\_MDA07\\_practicals/Further reading/Oksanen 2005/](http://ubio.bioinfo.cnio.es/Cursos/CEU_MDA07_practicals/Further reading/Oksanen 2005/)
- 1166 67. Mander L, Kürschner WM, McElwain JC. An explanation for conflicting records of  
1167 Triassic–Jurassic plant diversity. *Proceedings of the National Academy of Sciences of the*  
1168 *United States of America* 2010; 107: 15351–15356.



- 1169 68. Hammer Ø, Harper DAT, Ryan PD. PAST: paleontological statistics software package for  
1170 education and data analysis. *Palaeontologia Electronica* 4; 2001. [cited 2020 September 10].  
1171 Available from: [http://www.palaeo-electronica.org/2001\\_1/past/issue1\\_01.htm](http://www.palaeo-electronica.org/2001_1/past/issue1_01.htm).
- 1172 69. Hair JF, Black WC, Babin BJ, Anderson RE. *Multivariate Data Analysis*. Seventh  
1173 Edition. Prentice Hall, Upper Saddle River, New Jersey; 2010.
- 1174 70. Minchin PR. An evaluation of the relative robustness of techniques for ecological  
1175 ordination. *Vegetatio* 1987; 69: 89–107.
- 1176 71. Jardine PE, Harrington GJ. The Red Hills Mine palynoflora: A diverse swamp  
1177 assemblage from the Late Paleocene of Mississippi, USA. *Palynology* 2008; 32: 183–204.
- 1178 72. Ghilardi B, O'Connell M. Fine resolution pollen analytical study of Holocene woodland  
1179 dynamics and land use in north Sligo, Ireland. *Boreas* 2013; 42: 623–649.
- 1180 73. Broothaerts N, Verstraeten G, Kasse C, Bohncke S, Notebaert B, Vandenberghe J.  
1181 Reconstruction and semi-quantification of human impact in the Dijle catchment, central  
1182 Belgium: a palynological and statistical approach. *Quaternary Science Reviews* 2014; 102:  
1183 96–110.
- 1184 74. Borsch T, Wilde V. Pollen variability within species, populations, and individuals, with  
1185 particular reference to *Nelumbo nucifera*. In: Harley M, Blackmore S, Morton C, editors.  
1186 *Pollen and Spores: Morphology and Biology*. London: Royal Botanic Gardens, Kew; 2000.  
1187 pp. 285–299.
- 1188 75. Colwell RK, Chao A, Gotelli NJ, Lin SY, Mao CX, Chazdon RL, et al. Models and  
1189 estimators linking individual-based and sample-based rarefaction, extrapolation, and  
1190 comparison of assemblages. *Journal of Plant Ecology* 2012; 5: 3–21.
- 1191 76. Colwell RK. *EstimatesS: Statistical estimation of species richness and shared species*  
1192 *from samples*. Version 9. 2013. Available from: <http://viceroy.eeb.uconn.edu/EstimateS/>

- 1193 77. Keen HF, Gosling WD, Hanke F, Miller CS, Montoya E, Valencia BG, et al. A statistical  
1194 sub-sampling tool for extracting vegetation community and diversity information from pollen  
1195 assemblage data. *Palaeogeography, Palaeoclimatology, Palaeoecology* 2014; 408: 48–59.
- 1196 78. Whittaker RH. Evolution and measurement of species diversity. *Taxon* 1972; 21: 213–  
1197 251.
- 1198 79. Harrington GJ, Jaramillo CA. Paratropical floral extinction in the Late Palaeocene–Early  
1199 Eocene. *Journal of the Geological Society London* 2007; 164: 323–332.
- 1200 80. Birks HJB, Felde VA, Bjune AE, Grytnes JA, Seppä H, Giesecke T. Does pollen-  
1201 assemblage richness reflect floristic richness? A review of recent developments and future  
1202 challenges. *Review of Palaeobotany and Palynology* 2016; 228: 1–25.
- 1203 81. Ellison AM. Partitioning diversity. *Ecology* 2010; 91: 1962–1963.
- 1204 82. Beck J, Holloway JD, Schwanghart W. Undersampling and the measurement of beta  
1205 diversity. *Methods in Ecology and Evolution* 2013; 4: 370–382.
- 1206 83. Whittaker RH. Vegetation of the Siskiyou mountains, Oregon and California. *Ecological*  
1207 *Monographs* 1960; 30: 279–338.
- 1208 84. Koleff P, Gaston KJ, Lennon JJ. Measuring beta diversity for presence–absence data.  
1209 *Journal of Animal Ecology* 2003; 72: 367–382.
- 1210 85. Gotelli NJ, Colwell, RK. Estimating species richness. In Magurran AE, McGill BJ,  
1211 editors. *Biological diversity. Frontiers in measurement and assessment*. Oxford University  
1212 Press, New York; 2010. pp. 39–54.
- 1213 86. Smith B, Wilson JB. A consumer's guide to evenness indices. *Oikos* 1996; 76: 70–82.
- 1214 87. Vogt W. Makropetrographischer Flözaufbau der rheinischen Braunkohle und  
1215 Brikettiereigenschaften der Lithotypen. *Fortschritte in der Geologie von Rheinland und*  
1216 *Westfalen* 1981; 29: 73–93.

- 1217 88. Faegri K, Iversen J, Kaland PE, Krzywinski, K. Textbook of pollen analysis. 4th ed.  
1218 Chichester. New York, Brisbane, Tokyo, Singapore: John Wiley & Sons; 1989.
- 1219 89. Inglis GN, Collinson ME, Riegel W, Wilde V, Robson BE, Lenz OK, et al. Ecological  
1220 and biogeochemical change in an early Paleogene peat-forming environment: Linking  
1221 biomarkers and palynology, *Palaeogeography, Palaeoclimatology, Palaeoecology* 2015; 438:  
1222 245–255.
- 1223 90. Gastaldo RA, Allen GP, Huc AY. Detrital peat formation in the tropical Mahakam River  
1224 delta, Kalimantan, eastern Borneo: Sedimentation, plant composition, and geochemistry. In:  
1225 Cobb JC, Blaine C, editors. *Modern and Ancient Coal-Forming Environments* Mires. USA:  
1226 Geological Society of America Special Paper 286; 1993. pp. 107–118.
- 1227 91. Gastaldo, RA. The genesis and sedimentation of phytoclasts with examples from coastal  
1228 environments. In: Traverse A, editor. *Sedimentation of Organic Particles*. Cambridge, UK:  
1229 Cambridge University Press; 1994. pp. 103–127.
- 1230 92. Krebs CJ. *Ecological methodology*. New York, NY: Harper and Row Publishers Inc.;  
1231 1989.
- 1232 93. Cohen AD. Peats from the Okefenokee Swamp-marsh complex. *Geoscience and Man*  
1233 1975; 11: 123–131.
- 1234 94. Willard DA, Weimer LM, Riegel W. Pollen assemblages as paleoenvironmental proxies  
1235 in the Florida Everglades. *Review of Palaeobotany and Palynology* 2001; 113: 213–235.
- 1236 95. Schneck T. *Umweltrekonstruktion mit Hilfe der Palynologie: eine Studie über bisher*  
1237 *ungenutzte Potentiale*. PhD Thesis, Eberhard Karls Universität Tübingen. 2006. Available  
1238 from: <http://hdl.handle.net/10900/48942>
- 1239 96. Smith AHV. The sequence of microspore assemblages associated with the occurrence of  
1240 crassidurite in coal seams of Yorkshire. *Geological Magazine* 1957; 94: 345–363.

- 1241 97. Smith AHV. The palaeoecology of carboniferous peats based on the miospores and  
1242 petrography of bituminous coals. *Proceedings of the Yorkshire Geological Society* 1962; 33:  
1243 423–474.
- 1244 98. Smith AVH. Seam profiles and seam characters. In: Murchison D, Westoll TS, editors.  
1245 *Coal and coal-bearing strata*. New York: Elsevier; 1968. pp. 31–40.
- 1246 99. Dai S, Bechtel A, Eble CF, Flores RM, French D, Graham IT, et al. Recognition of peat  
1247 depositional environments in coal: A review. *International Journal of Coal Geology* 2020. doi:  
1248 10.1016/j.coal.2019.103383
- 1249 100. Daubenmire RF. *Plant Geography with special reference to North America*. New York,  
1250 NY: Academic Press; 1978.
- 1251 101. Box EO. Warm-Temperate Deciduous Forests of Eastern North America. In: Box E,  
1252 Fujiwara K, editors. *Warm-Temperate Deciduous Forests around the Northern Hemisphere*.  
1253 *Geobotany Studies (Basics, Methods and Case Studies)*. Cham: Springer; 2015. pp. 225–255.
- 1254 102. Teichmüller M. Rekonstruktion verschiedener Moortypen des Hauptflözes der  
1255 niederrheinischen Braunkohle. *Fortschritte in der Geologie des Rheinlandes und Westfalen*  
1256 1958; 2: 539–612.
- 1257 103. Teichmüller M. The genesis of coal from the viewpoint of coal petrology. *International*  
1258 *Journal of Coal Geology* 1989; 12: 1–87.
- 1259 104. Ivanov DA, Koleva-Rekalova R. Palynological and sedimentological data about late  
1260 Sarmatian palaeoclimatic changes in the Fore-Carpathian and Euxinian Basins (northern  
1261 Bulgaria). *Acta Palaeobotanica Supplementum* 1999; 2: 307–313.
- 1262 105. Karon R. Palinofacies in the Turów open pit (SW Poland). *Acta Palaeobotanica*  
1263 *Supplementum* 1999; 2: 315–317.

- 1264 106. Riegel W, Bode T, Hammer J, Hammer-Schiemann G, Lenz, O, Wilde, V. The  
1265 Palaeoecology of the lower and middle Eocene at Helmstedt, northern Germany: a study in  
1266 contrasts: *Acta Palaeobotanica Supplementum* 1999; 2: 349–358.
- 1267 107. Holdgate G, Wallace M, O'Connor M, Korasidis V, Lieven U. The origin of lithotype  
1268 cycles in Oligo-Miocene brown coals from Australia and Germany. *International Journal of*  
1269 *Coal Geology* 2016; 166: 47–61.
- 1270 108. Lenz OK, Riegel W. Isopollen maps as a tool for the reconstruction of a coastalswamp  
1271 from the Middle Eocene at Helmstedt (Northern Germany). *Facies* 2001; 45: 177–194.
- 1272 109. Wilde V, Lenz OK, Riegel W. Mangrove structure and development in the Lower and  
1273 Middle Eocene of Helmstedt, northern Germany. *Terra Nostra* 2008; 2: 306–307.
- 1274 110. Natlandsmyr B, Hjelle KL. Long-term vegetation dynamics and land-use history:  
1275 Providing a baseline for conservation strategies in protected *Alnus glutinosa* swamp  
1276 woodlands. *Forest Ecology and Management* 2016; 372: 78–92.
- 1277 111. Houston DT, de Rigo D, Caudullo G. *Alnus incana* in Europe: distribution, habitat, usage  
1278 and threats. In: San-Miguel-Ayanz J, de Rigo D, Caudullo G, Houston DT, Mauri A, editors.  
1279 *European Atlas of Forest Tree Species*. Luxembourg: Publication Office of the European  
1280 Union; 2016: pp. e01ff87+.
- 1281 112. Fralish JS, Franklin SB. *Taxonomy and Ecology of Woody Plants in North American*  
1282 *Forests (Excluding Mexico and Subtropical Florida)*. New York, NY: John Wiley & Sons;  
1283 2002.
- 1284 113. Spackman W, Riegel WL, Dolsen CP. Geological and biological interactions in the  
1285 swamp-marsh complex of Southern Florida. In: Dapples EC, Hopkins ME, editors.  
1286 *Environments of Coal Deposition*. USA: Geological Society of America Special Paper 114;  
1287 1969. pp. 1–35.

- 1288 114. Cohen AD. Possible influences of subpeat topography and sediment type upon the  
1289 development of the Okefenokee swamp-marsh complex of Georgia. *Southeastern Geology*  
1290 1974; 15: 141–151.
- 1291 115. Hamilton DB. Plant succession and the influence of disturbance in Okefenokee Swamp.  
1292 In: Cohen AD, Casagrande DJ, Andrejko MJ, Best GR, editors. *The Okefenokee Swamp: Its*  
1293 *Natural History, Geology, and Geochemistry*. Los Alamos: Wetland Surveys; 1984. pp. 86–  
1294 106.
- 1295 116. Ewel KC. Swamps. In: Myers RL, Ewel JJ, editors. *Ecosystems of Florida*. Orlando:  
1296 University of Central Florida Press; 1990. pp. 281–323.
- 1297 117. Gastaldo RA, Staub JR. A mechanism to explain the preservation of leaf litter lenses in  
1298 coals derived from raised mires. *Palaeogeography, Palaeoclimatology, Palaeoecology* 1999;  
1299 149: 1–14.
- 1300 118. Punt W, Marks A, Hoen PP. The Northwest European Pollen Flora, 66. Myricaceae.  
1301 *Review of Palaeobotany and Palynology* 2002; 123: 99–105
- 1302 119. Grimsson F., Grimm GW, Meller B, Bouchal JM, Zetter R. Combined LM and SEM  
1303 study of the middle Miocene (Sarmatian) palynoflora from the Lavanttal Basin, Austria: part  
1304 IV. Magnoliophyta 2 – Fagales to Rosales. *Grana* 2016; 55: 101–163.
- 1305 120. Simpson MJA., Macintosh DF, Cloughley JB., Stuart AE. Past, present and future  
1306 utilisation of *Myrica gale* (Myricaceae). *Economic Botany* 1996; 50: 122–129.
- 1307 121. Skene KR, Sprent JI, Raven JA, Herdman L. *Myrica gale* L. Biological flora of the British  
1308 Isles. *Journal of Ecology* 2000; 88: 1079–1094.
- 1309 122. van Breemen N. How *Sphagnum* bogs down other plants. *Trends in Ecology & Evolution*  
1310 1995; 10: 270–275.

- 1311 123. Clymo R. 1984. The limits to peat bog growth. *Philosophical Transactions of the Royal*  
1312 *Society B* 1984; 303: 605–654.
- 1313 124. Page SE, Rieley JO, Shotyk W, Weiss D. Interdependence of peat and vegetation in  
1314 tropical swamp forest. *Philosophical Transactions of the Royal Society B* 1999; 354: 1885–  
1315 1897.
- 1316 125. Cohen AD, Andrejko MJ, Spackman W, Corvinus D. Peat deposits of the Okefenokee  
1317 Swamp. In: Cohen AD, Casagrande DJ, Andrejko MJ, Best GR. editors. *The Okefenokee*  
1318 *Swamp: Its Natural History, Geology, and Geochemistry*. Los Alamos: Wetland Surveys;  
1319 1984. pp. 493–553.
- 1320 126. Moore PD. Ecological and hydrological aspects of peat formation. In: Scott AC, editor.  
1321 *Coal and Coal-bearing Strata: Recent Advances*. London, UK; Geological Society London  
1322 Special Publication 32; 1987. pp. 7–16.
- 1323 127. Korasidis VA, Wallace MW, Tosolini AMP, Hill RS. The origin of floral lagerstätten in  
1324 coals. *Palaios* 2020; 35: 22–36.
- 1325 128. Daly RJ, Jolley DW. What was the nature and role of Normapolles angiosperms? A case  
1326 study from the earliest Cenozoic of Eastern Europe. *Palaeogeography, Palaeoclimatology,*  
1327 *Palaeoecology* 2015; 418: 141–149.
- 1328 129. Loftin SS, Guyette MQ, Wetzel PR. Evaluation of Vegetation-Fire Dynamics in the  
1329 Okefenokee National Wildlife Refuge, Georgia, USA, with Bayesian Belief Networks.  
1330 *Wetlands* 2018; 38: 819–834.
- 1331 130. Cypert E. The effect of fires in the Okefenokee Swamp in 1954 and 1955. *The American*  
1332 *Midland Naturalist*. 1961; 66: 485–503.
- 1333 131. Cohen AD. Petrography and paleoecology of Holocene peats from the Okefenokee  
1334 swamp-marsh complex of Georgia. *Journal of Sedimentary Petrology* 1974; 44: 716–726.

- 1335 132. Izlar, RL. Some comments on fire and climate in the Okefenokee swamp-marsh complex.  
1336 In: Cohen AD, Casagrande DJ, Andrejko MJ, Best GR, editors. The Okefenokee swamp: its  
1337 natural history, geology and geochemistry. Los Alamos: Wetland Surveys; 1984. pp. 70–85.
- 1338 133. Hofmann CC, Zetter R. Palynological investigations of the Krappfeld area,  
1339 Palaeocene/Eocene, Carinthia (Austria). *Palaeontographica B* 2001; 259: 47–64
- 1340 134. Zetter R., Hofmann CC. New aspects on the palyno-flora of the lowermost Eocene  
1341 (Krappfeld, Carinthia). In: Piller WE, Rasser MW, editors. *Paleogene of the Eastern Alps*.  
1342 Wien: Verlag der Österreichischen Akademie der Wissenschaften 12; 2001. pp. 473–507.
- 1343 135. Harrington GJ. Impact of Paleocene/Eocene Greenhouse Warming on North American  
1344 Paratropical Forests. *Palaios* 2001; 16: 266–278.
- 1345 136. Harrington GJ. Geographic patterns in the floral response to Paleocene–Eocene warming.  
1346 In: Wing SL, Gingerich PD, Schmitz B, Thomas E, editors. *Causes and consequences of*  
1347 *globally warm climates in the early Paleogene*. USA: Geological Society of America Special  
1348 Paper 369; 2003. pp. 381–393.
- 1349 137. Page SE, Rieley JO, Wust R. Chapter 7. Lowland tropical peatlands of Southeast Asia. In:  
1350 Martini IP, Martinez Cortizas A, Chesworth W, editors. *Peatlands - Evolution and Records of*  
1351 *Environmental and Climate Changes*. Elsevier: *Developments in Earth Surface Processes* 9;  
1352 2006. pp. 145–172.
- 1353 138. Phillips S, Rouse GE, Bustin RM. Vegetation zones and diagnostic pollen profiles of a  
1354 coastal peat swamp, Bocas del Toro, Panamá. *Palaeogeography, Palaeoclimatology,*  
1355 *Palaeoecology* 2001; 128: 301–338.
- 1356 139. Inglis GN, Collinson ME, Riegel W, Wilde V, Farnsworth A, Lunt DJ, et al. Mid-latitude  
1357 continental temperatures through the early Eocene in western Europe. *Earth and Planetary*  
1358 *Science Letters* 2017; 460: 86–96.



- 1359 140. Greenwood DR, Basinger JF. The paleoecology of high-latitude Eocene swamp forests  
1360 from Axel Heiberg Island, Canadian High Arctic. *Review of Palaeobotany and Palynology*  
1361 2013; 81: 83–97.
- 1362 141. Eldrett JS, Greenwood DR, Polling M, Brinkhuis H, Sluijs A. A seasonality trigger for  
1363 carbon injection at the Paleocene–Eocene Thermal Maximum. *Climate of the Past* 2014; 10:  
1364 759–769.
- 1365 142. Weijers JWH, Schouten S, Sluijs A, Brinkhuis H, Sinninghe Damsté JS. Warm arctic  
1366 continents during the Palaeocene–Eocene thermal maximum. *Earth and Planetary Science*  
1367 *Letters* 2007; 261: 230–238.
- 1368 143. Wing SL, Bao H, Koch PL. An early Eocene cool period? Evidence for continental  
1369 cooling during the warmest part of the Cenozoic. In: Huber BT, MacLeod KG, Wing SL,  
1370 editors. *Warm Climates in Earth History*. Cambridge, UK: Cambridge University Press; 2000.  
1371 pp. 197–237.
- 1372 144. Campbell EO. The restiad peat bogs at Motumaoho and Moanatuatua. *Transactions of the*  
1373 *Royal Society of New Zealand* 1964; 2: 219–227.
- 1374 145. Campbell EO. Peat deposits of northern New Zealand as based on identification of plant  
1375 fragments in the peat. *Proceedings of the New Zealand Ecological Society* 1975; 22: 57–60.
- 1376 146. Campbell EO. Mires of Australasia. In: Gore AJP, editor. *Mires: swamp, bog, fen and*  
1377 *moor ecosystems of the world 4A*. Amsterdam, Oxford, New York: Elsevier Scientific  
1378 Publishing Company; 1983. pp. 153–180.
- 1379 147. Clarkson BR, Schipper LA, Lehmann A. Vegetation and peat characteristics in the  
1380 development of lowland restiad peat bogs, North Island, New Zealand. *Wetlands* 2004; 24:  
1381 133–151.

- 1382 148. Benson D, Baird IRC. Vegetation, fauna and groundwater interrelations in low nutrient  
1383 temperate montane peat swamps in the upper Blue Mountains, New South Wales.  
1384 *Cunninghamia* 2012; 12: 267–307
- 1385 149. Fairfax R, Lindsay R. An overview of the patterned fens of Great Sandy Region, far  
1386 eastern Australia. *Mires and Peat* 2019; 24: 1–18. doi: 10.19189/MaP.2018.OMB.369.
- 1387 150. Nichols DJ, Pocknall DT. Relationships of palynofacies to coal-depositional  
1388 environments in the upper Paleocene of the Gulf Coast Basin, Texas, and the Powder River  
1389 Basin, Montana and Wyoming. Traverse A, editor. *Sedimentation of Organic Particles*.  
1390 Cambridge University Press, Cambridge; 1994. pp. 217–237.
- 1391 151. Innes JB, Simmons I. Mid Holocene charcoal stratigraphy, fire history and palaeoecology  
1392 at North Gill, North York Moors, UK. *Palaeogeography, Palaeoclimatology, Palaeoecology*  
1393 2000; 164: 151–165.
- 1394 152. Nichols GJ, Cripps JA, Collinson ME, Scott AC. Experiments in waterlogging and  
1395 sedimentology of charcoal: results and implications. *Palaeogeography, Palaeoclimatology,*  
1396 *Palaeoecology* 2000; 164: 43–56.
- 1397 153. Scott AC, Glasspool IJ. Observations and experiments on the origin and formation of  
1398 inertinite group macerals. *International Journal of Coal Geology* 2007; 70: 53–66.
- 1399 154. Scott AC. Charcoal recognition, taphonomy and uses in palaeoenvironmental analysis.  
1400 *Palaeogeography, Palaeoclimatology, Palaeoecology* 2010; 291: 11–39.
- 1401 155. Clark JS. Particle motion and the theory of charcoal analysis: source area, transport,  
1402 deposition, and sampling. *Quaternary Research* 1988; 30: 67–80.
- 1403 156. Clark JS, Lynch J, Stocks BJ, Goldammer, JG. Relationships between charcoal particles  
1404 in air and sediments in west-central Siberia. *The Holocene* 1998; 8: 19–29.

- 1405 157. Collinson ME, Hooker JJ, Gröcke DR. Cobham Lignite Bed and penecontemporaneous  
1406 macrofloras of southern England: A record of vegetation and fire across the Paleocene-Eocene  
1407 Thermal Maximum. *Geological Society of America, Special Paper* 2003; 369: 333 – 349.
- 1408 158. Kurtz AC, Kump LR, Arthur MA, Zachos JC, Paytan A. Early Cenozoic decoupling of  
1409 the global carbon and sulphur cycles. *Palaeoceanography* 2003; 18: 1090–1104.
- 1410 159. Moore EA, Kurtz AC. Black carbon in Paleocene–Eocene boundary sediments: A test of  
1411 biomass combustion as the PETM trigger. *Palaeogeography, Palaeoclimatology,*  
1412 *Palaeoecology* 2008; 267: 147–152.
- 1413 160. Korasidis VA, Wallace MW, Wagstaff BE, Hill RS. Evidence of fire adaption in  
1414 Australian Cenozoic rainforests. *Palaeogeography, Palaeoclimatology, Palaeoecology* 2019;  
1415 516: 35–43.

1416

## 1417 **Supporting information**

### 1418 **S1 Table. Taxonomic list.**

1419 Complete list of palynomorphs from the studied sections N, S1, S2 from Seam 1 of the  
1420 Schöningen Formation including their systematic affinities. In the left column the 45 “variables”  
1421 are presented, which were used for the pollen diagrams and statistical analysis (cluster analysis,  
1422 non-metric multidimensional scaling).

1423

### 1424 **S2 Table: Raw data set of section N.**

1425 The data have been used for pollen diagram, cluster analysis and NMDS.

1426

### 1427 **S3 Table: Raw data set of section S1 (a).**

1428 The data have been used for pollen diagram, cluster analysis and NMDS.

1429

1430 **S4 Table: Raw data set of section S2**

1431 The data have been used for pollen diagram, cluster analysis and NMDS.

1432

1433 **S5 Table: Raw data set of section S1 (b)**

1434 The data have been used for diversity analysis.

1435

1436 **S6 Table: Estimations of beta diversity for Seam 1 in section S1.**

1437 Given are pairwise comparisons of 11 lignite samples from section S1 using the measure of [59,

1438 64]:  $(S/\bar{a}) - 1$ ; S, total number of species in the two compared samples,  $\bar{a}$ , average number of

1439 species in the two compared samples of Seam 1.

1440

1441

Figure 1

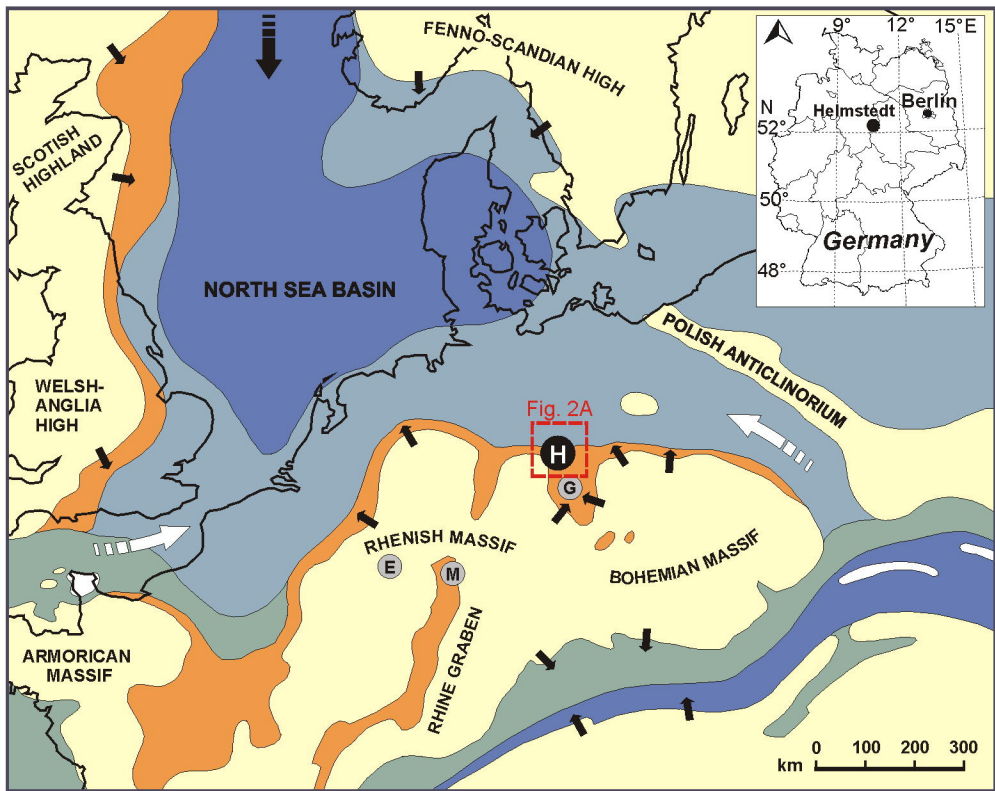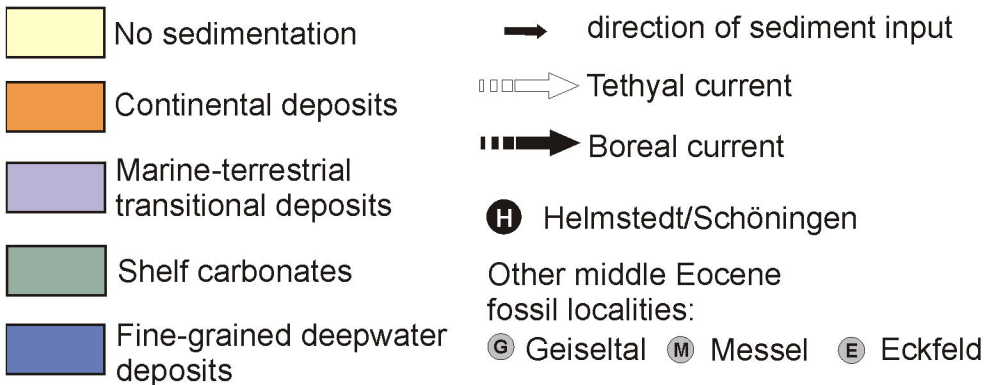

# Figure 2

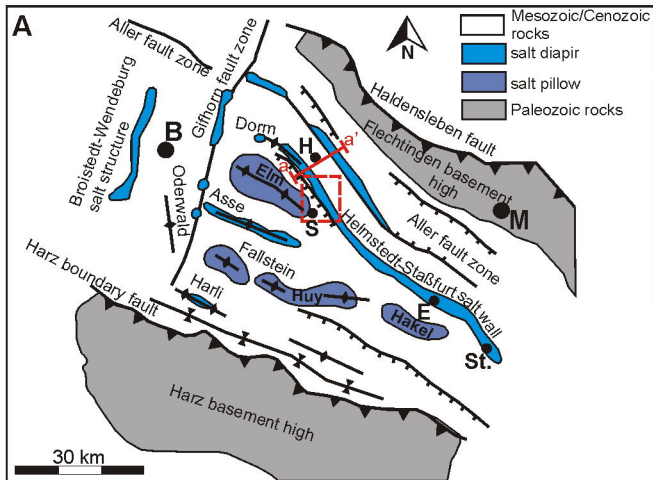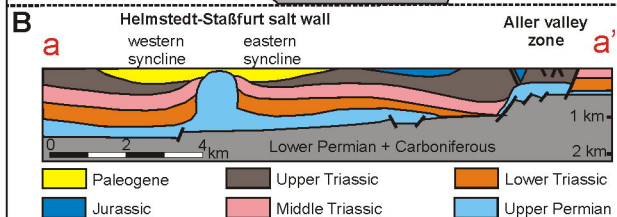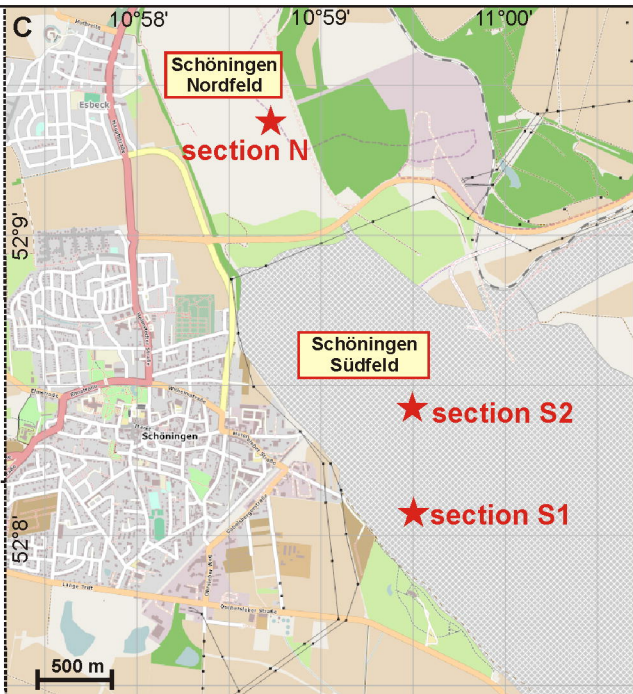

# Figure 3

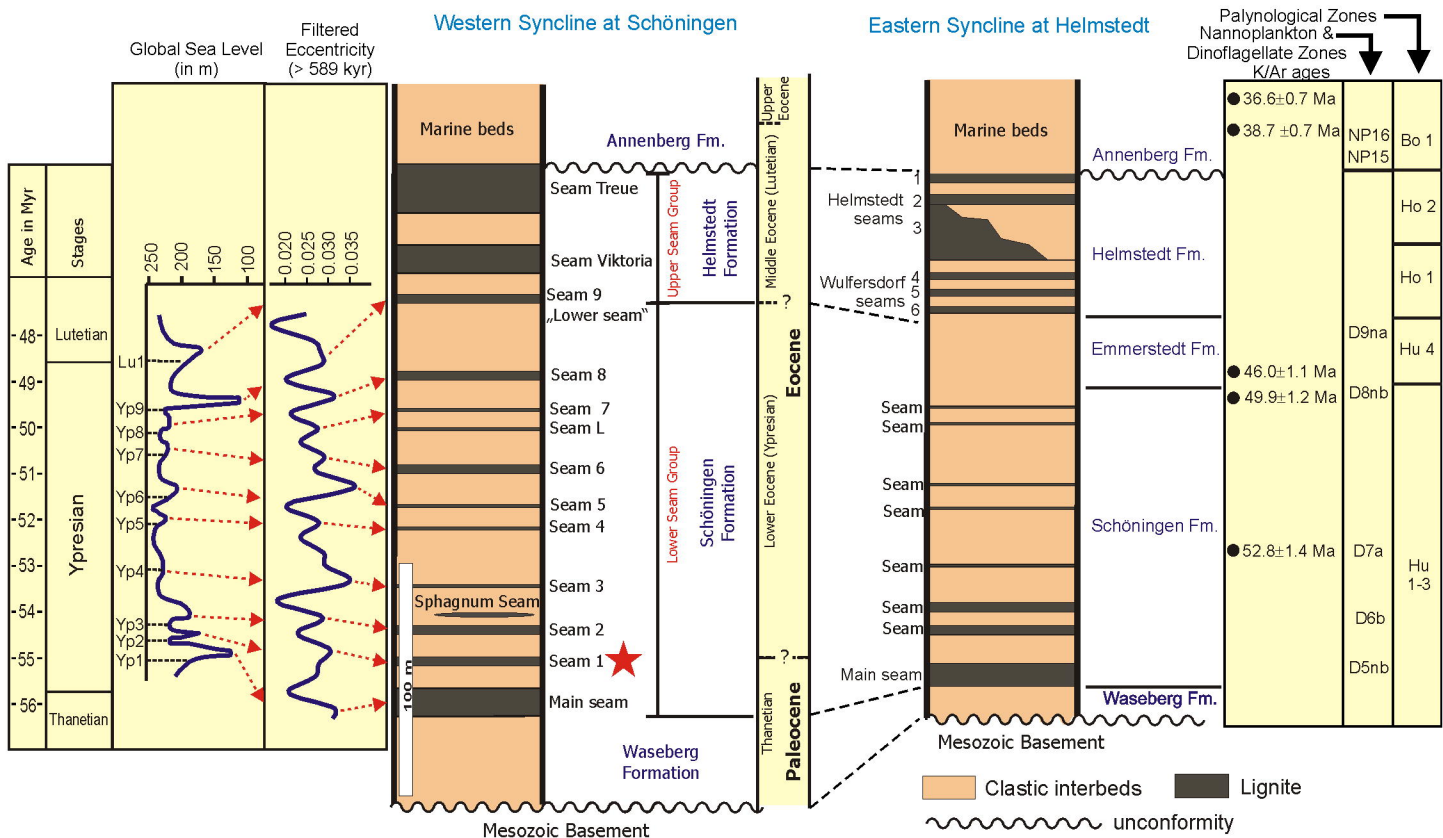



Figure 4

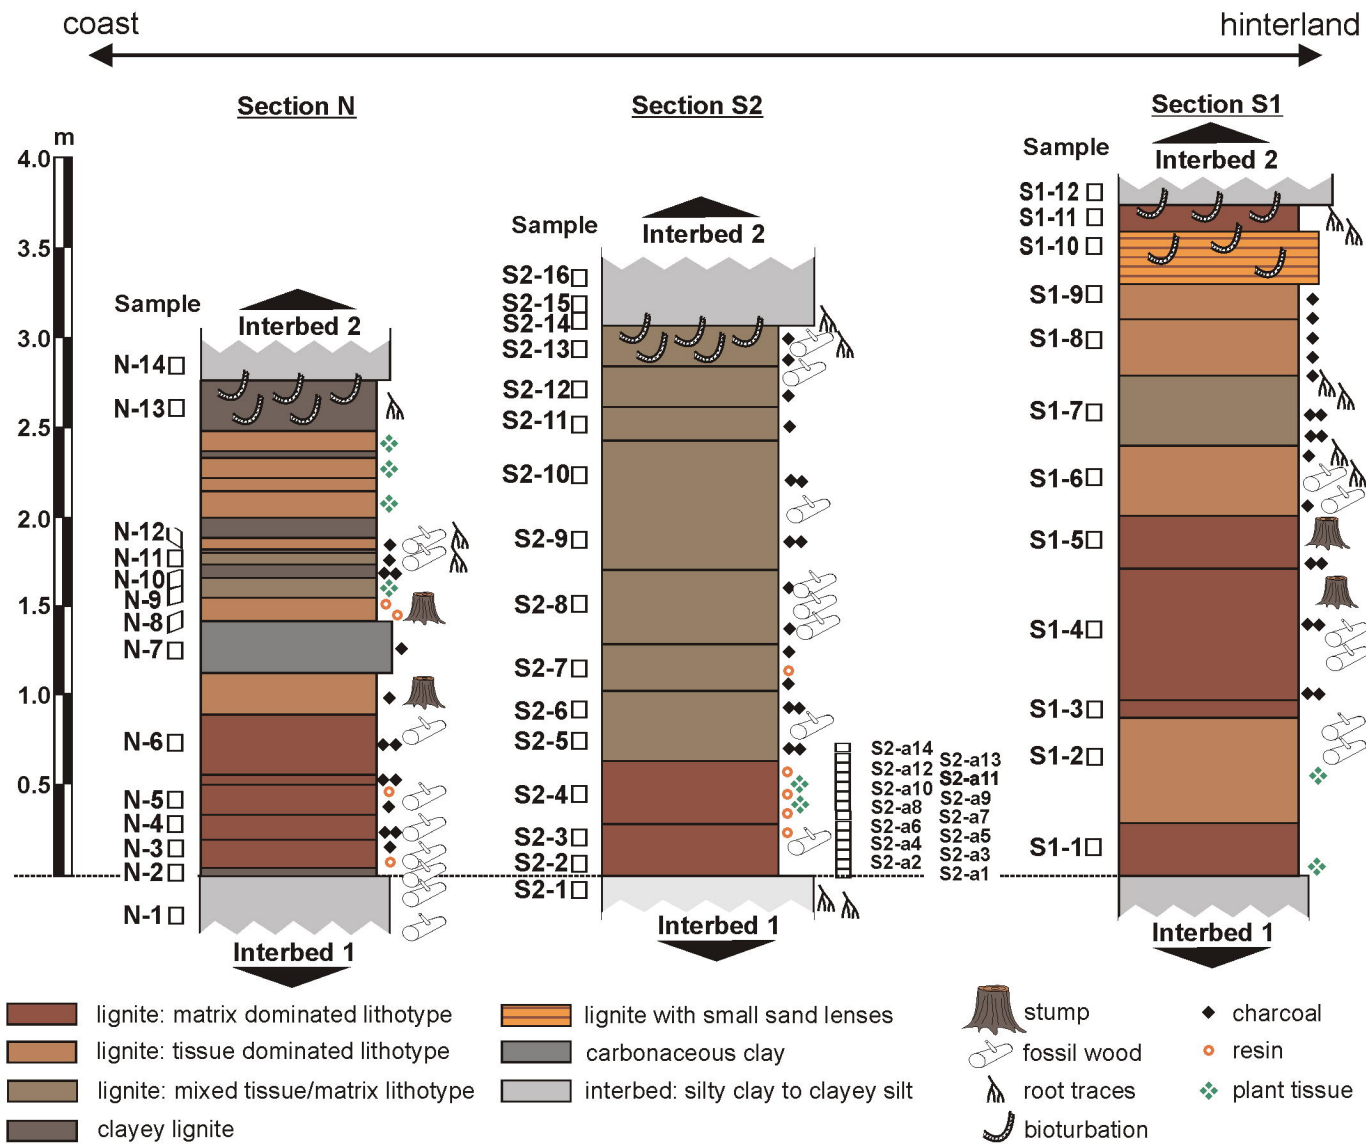



Figure 5

A

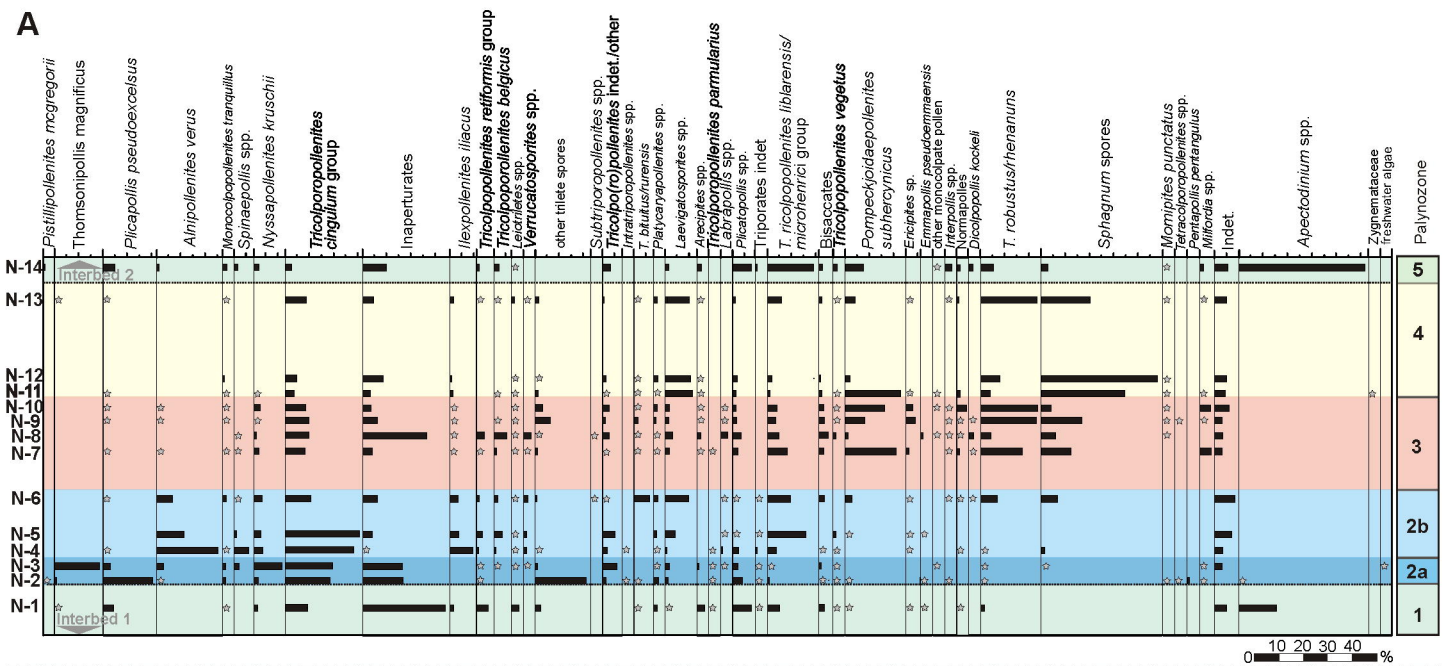

B

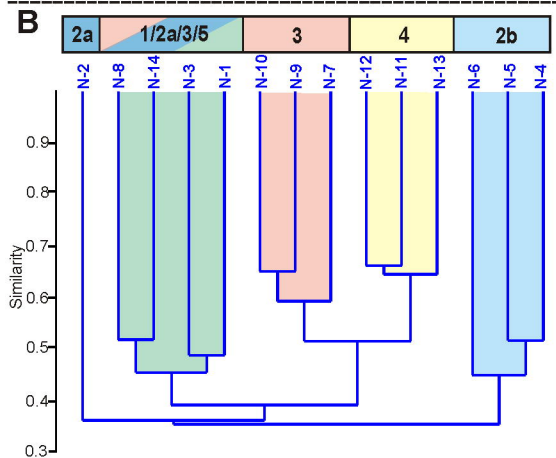

C

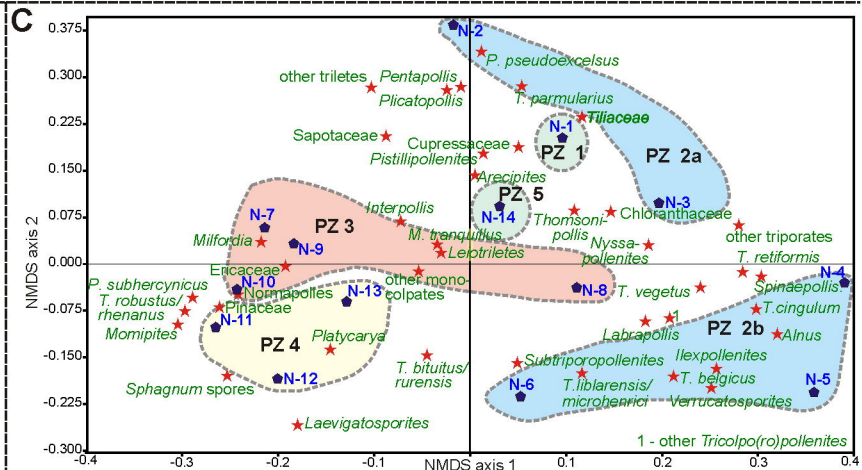

Figure 6

A

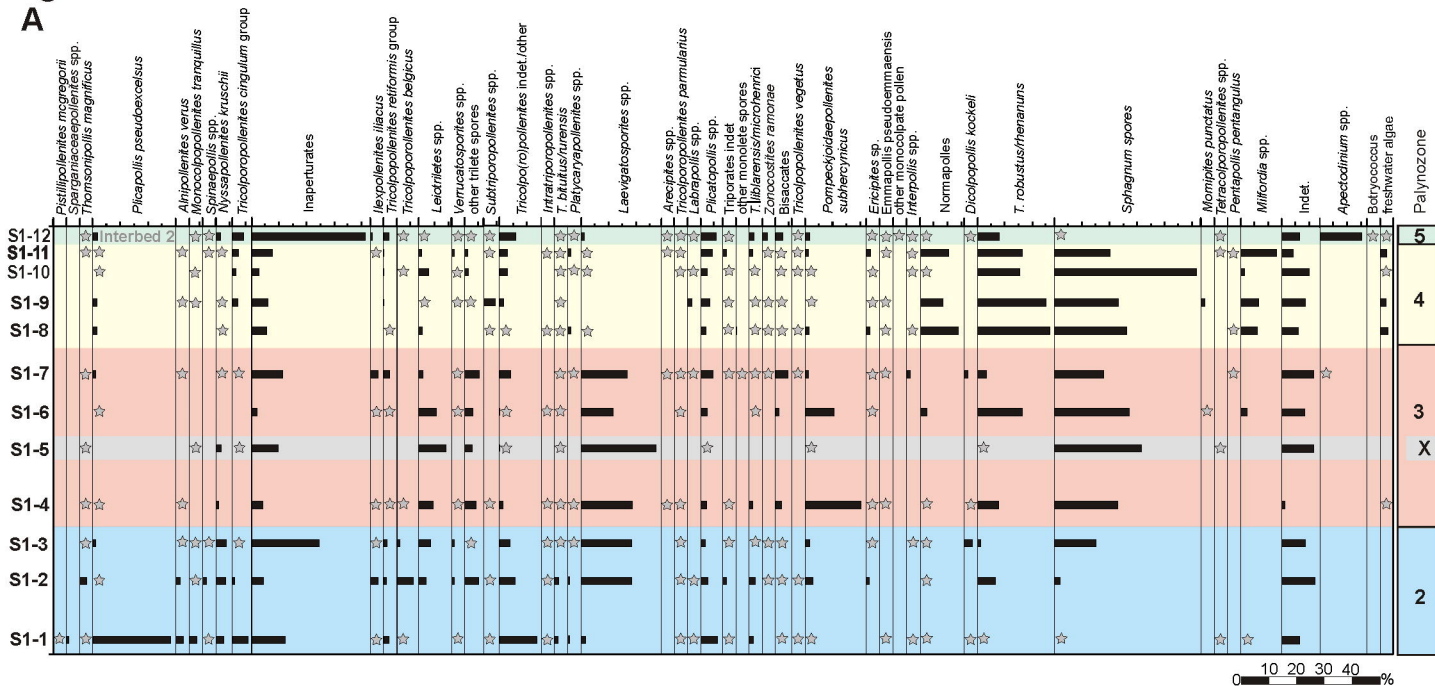

B

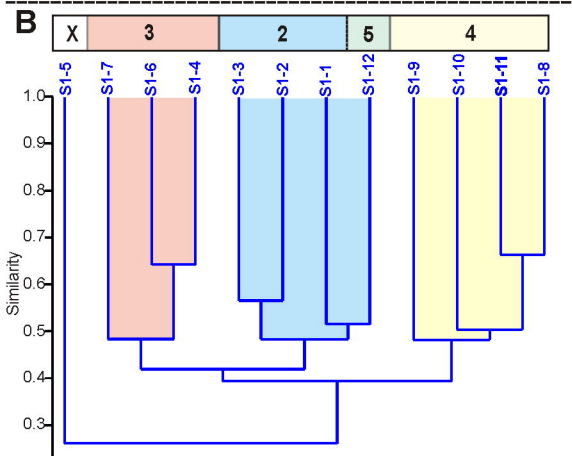

C

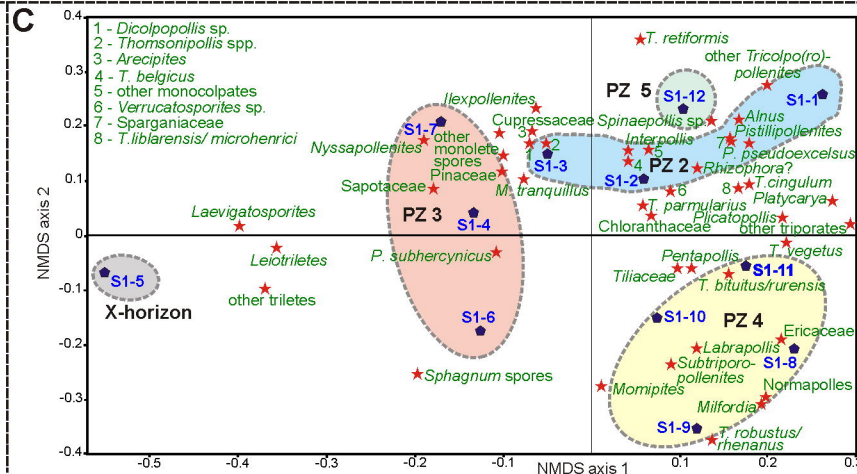

Figure 7

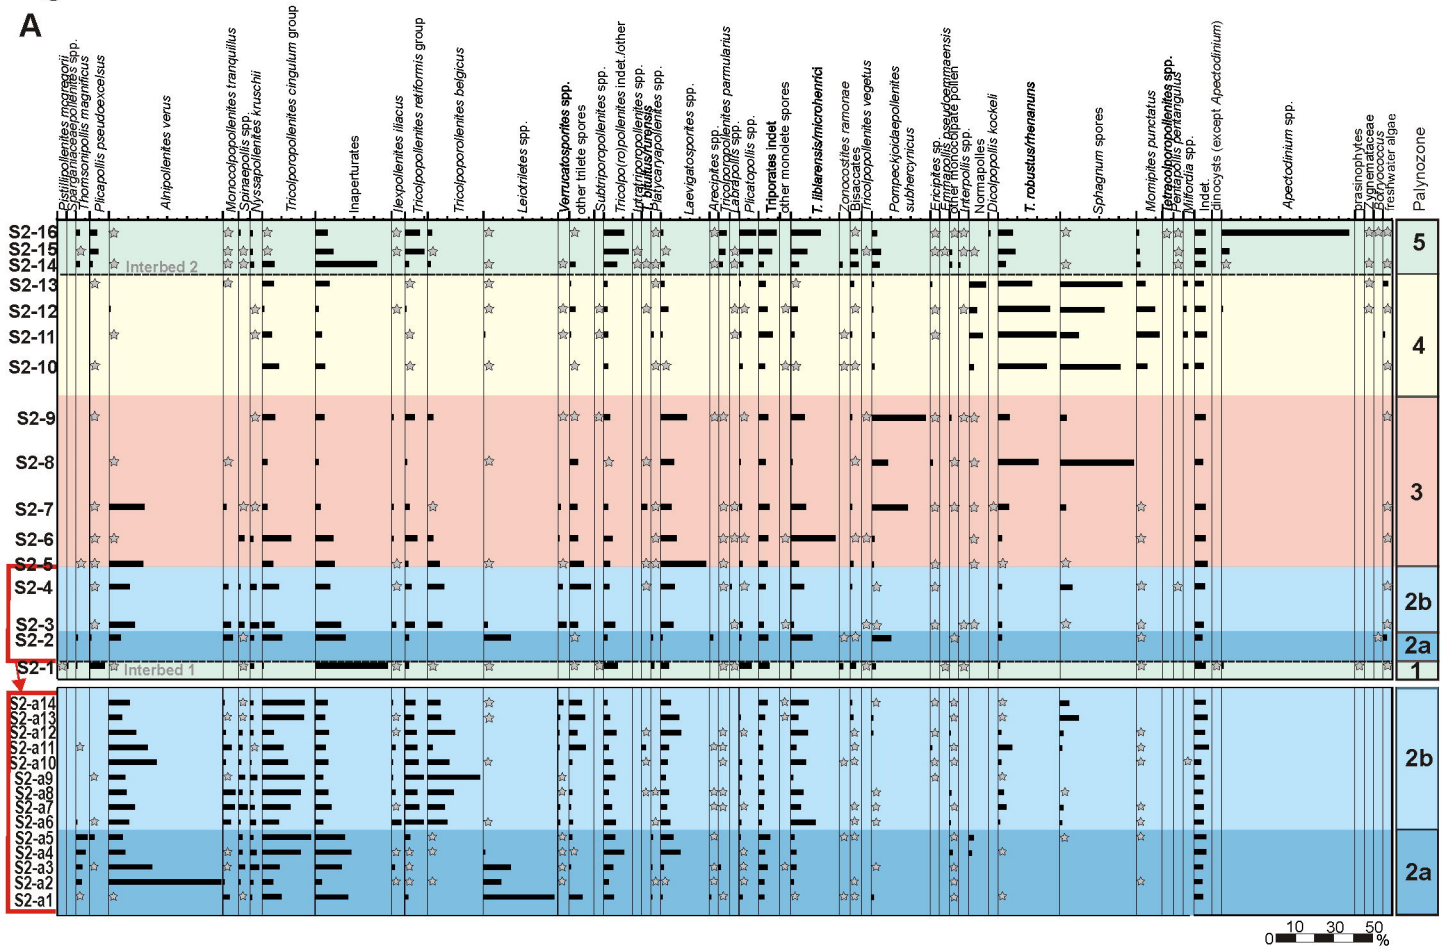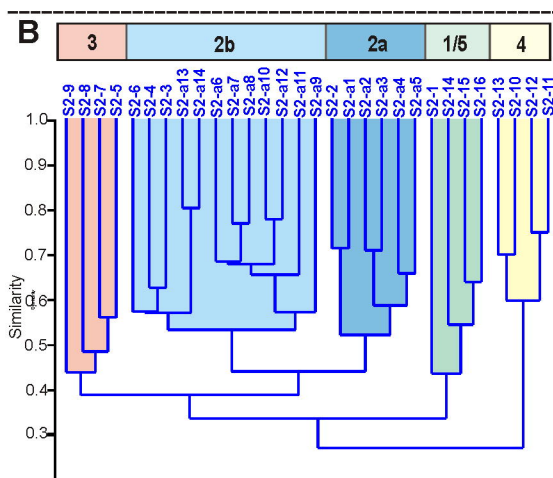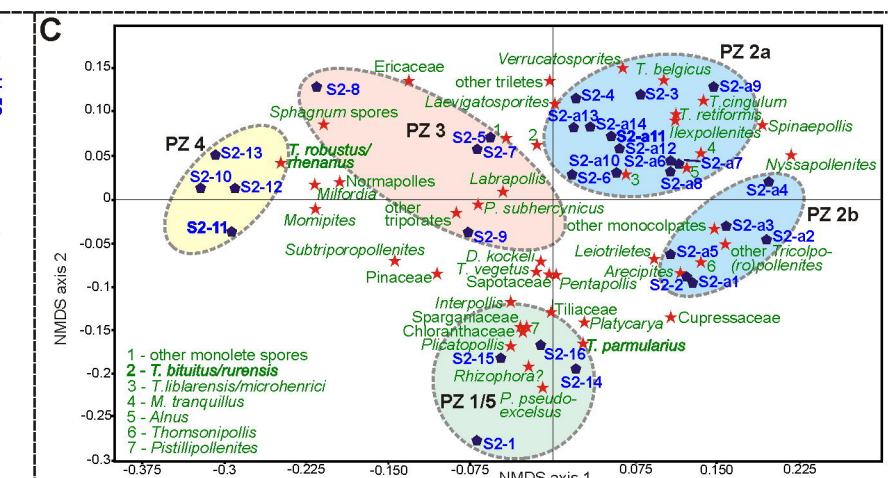



Figure 8

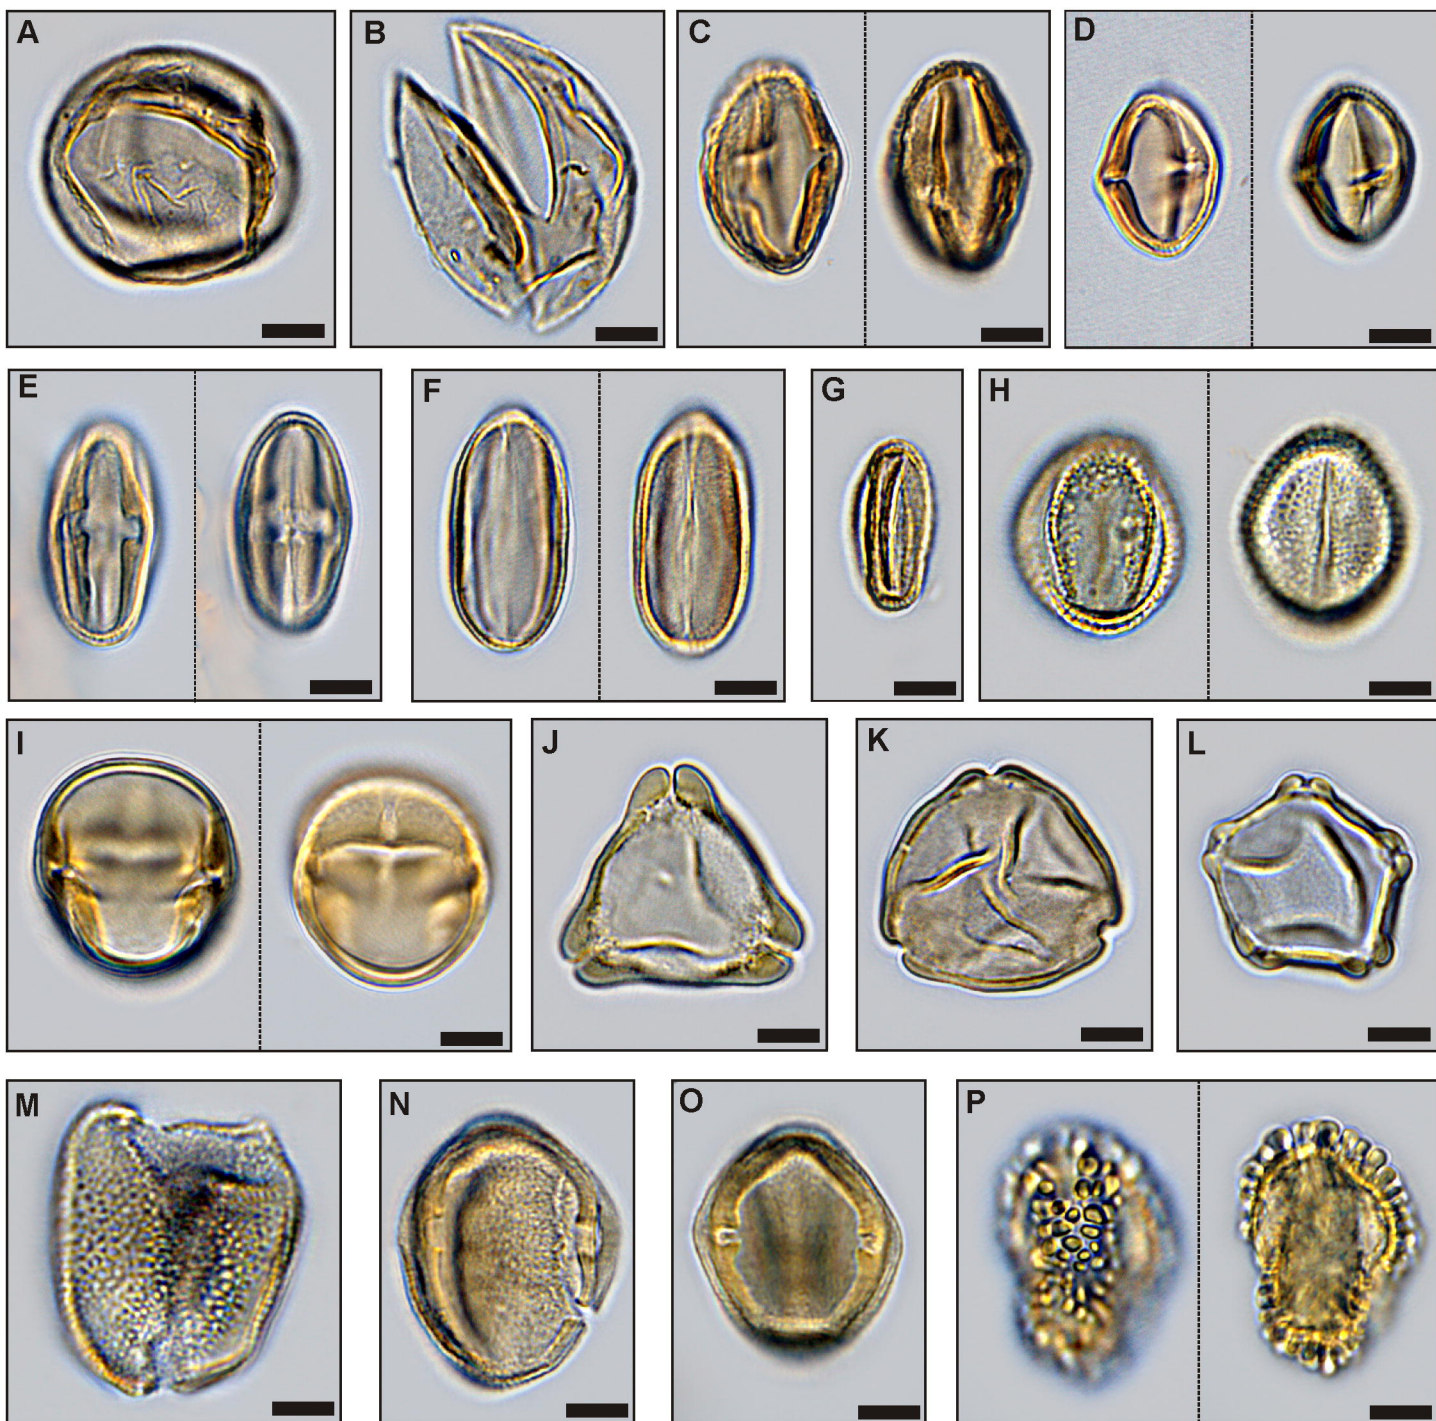



Figure 9

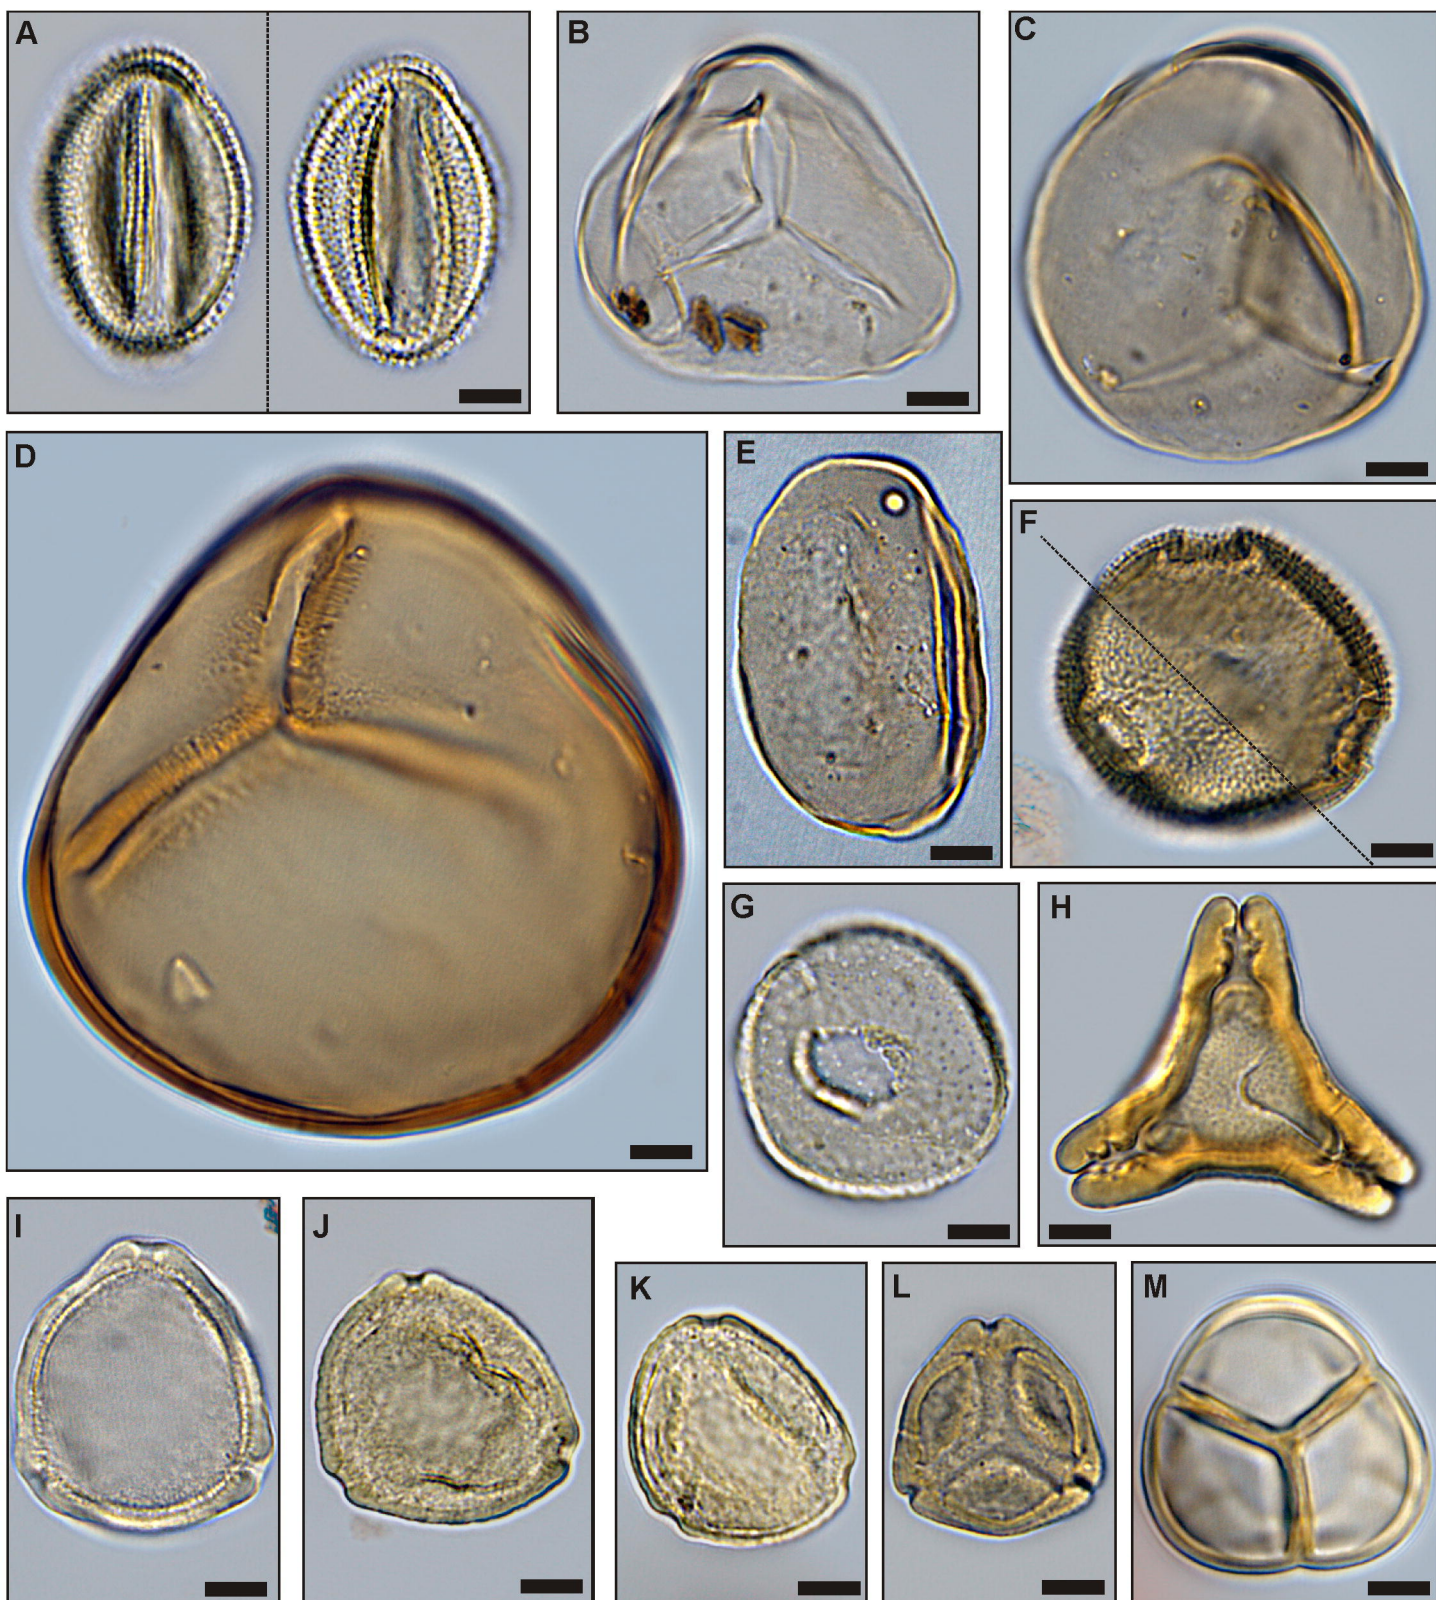

Figure 10

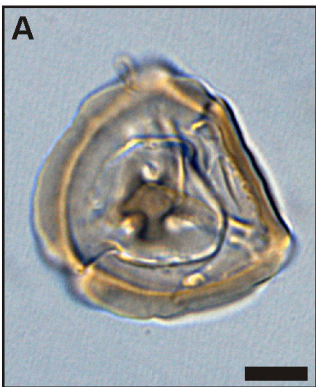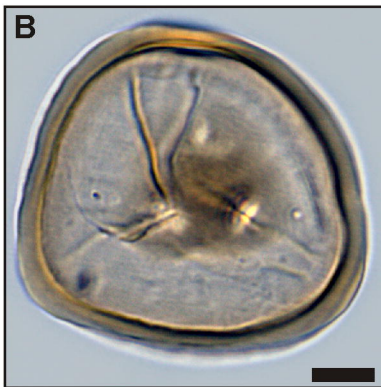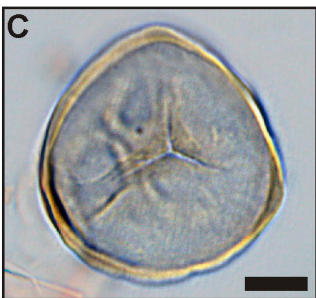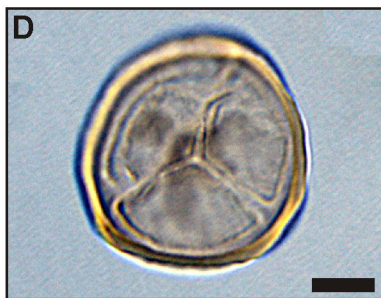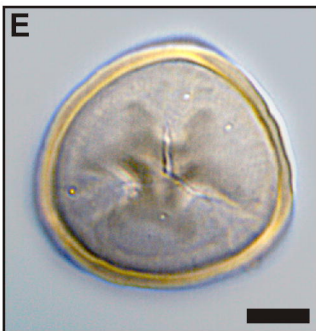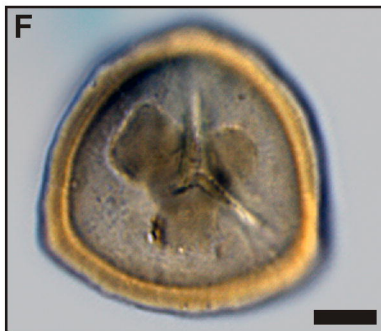

Figure 11

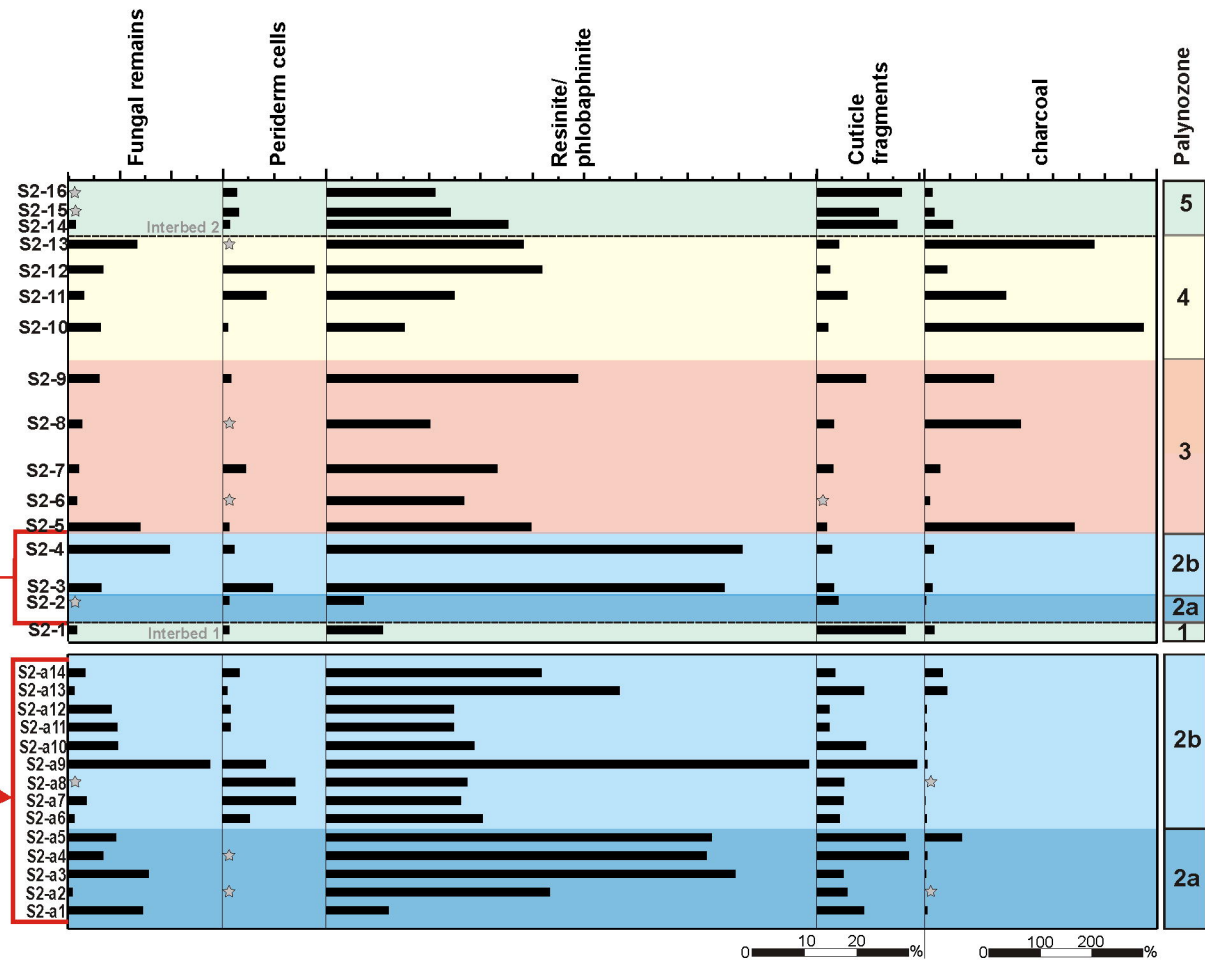



# Figure 12

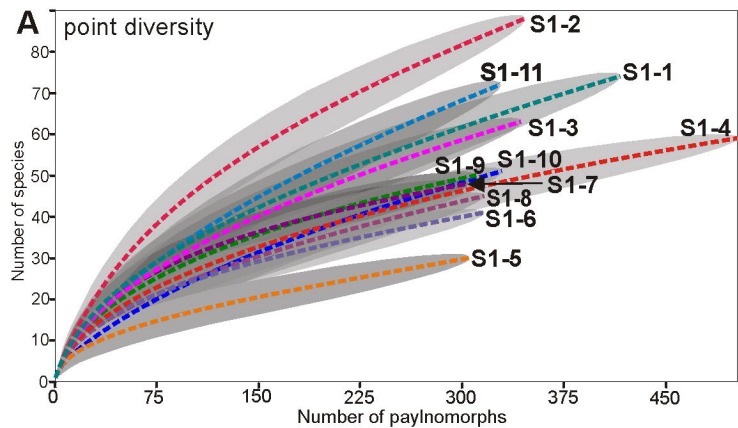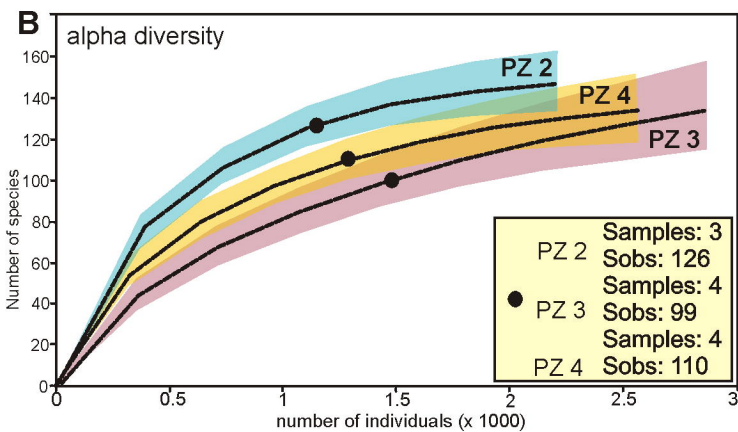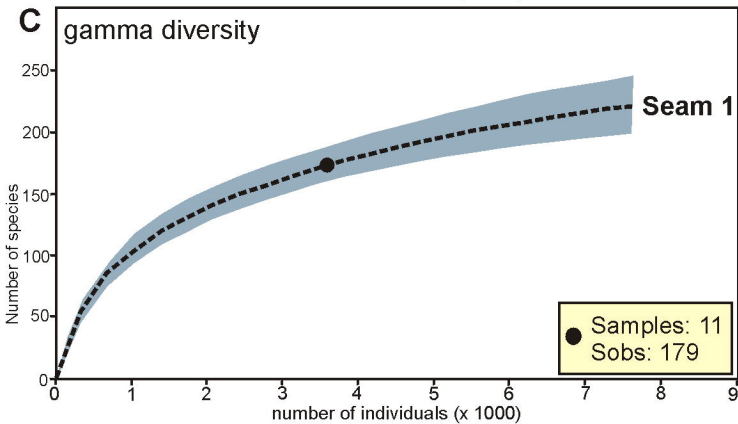



Figure 13

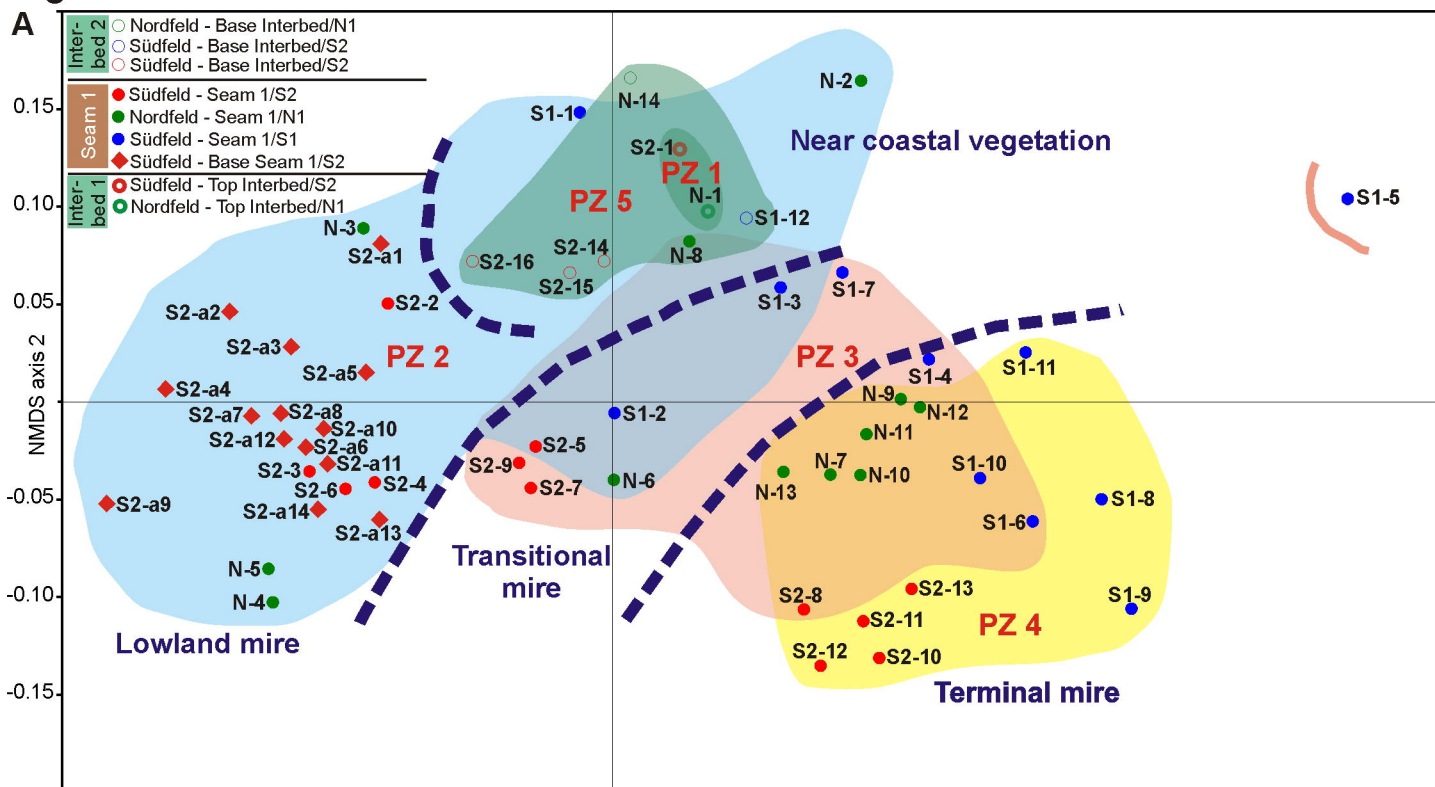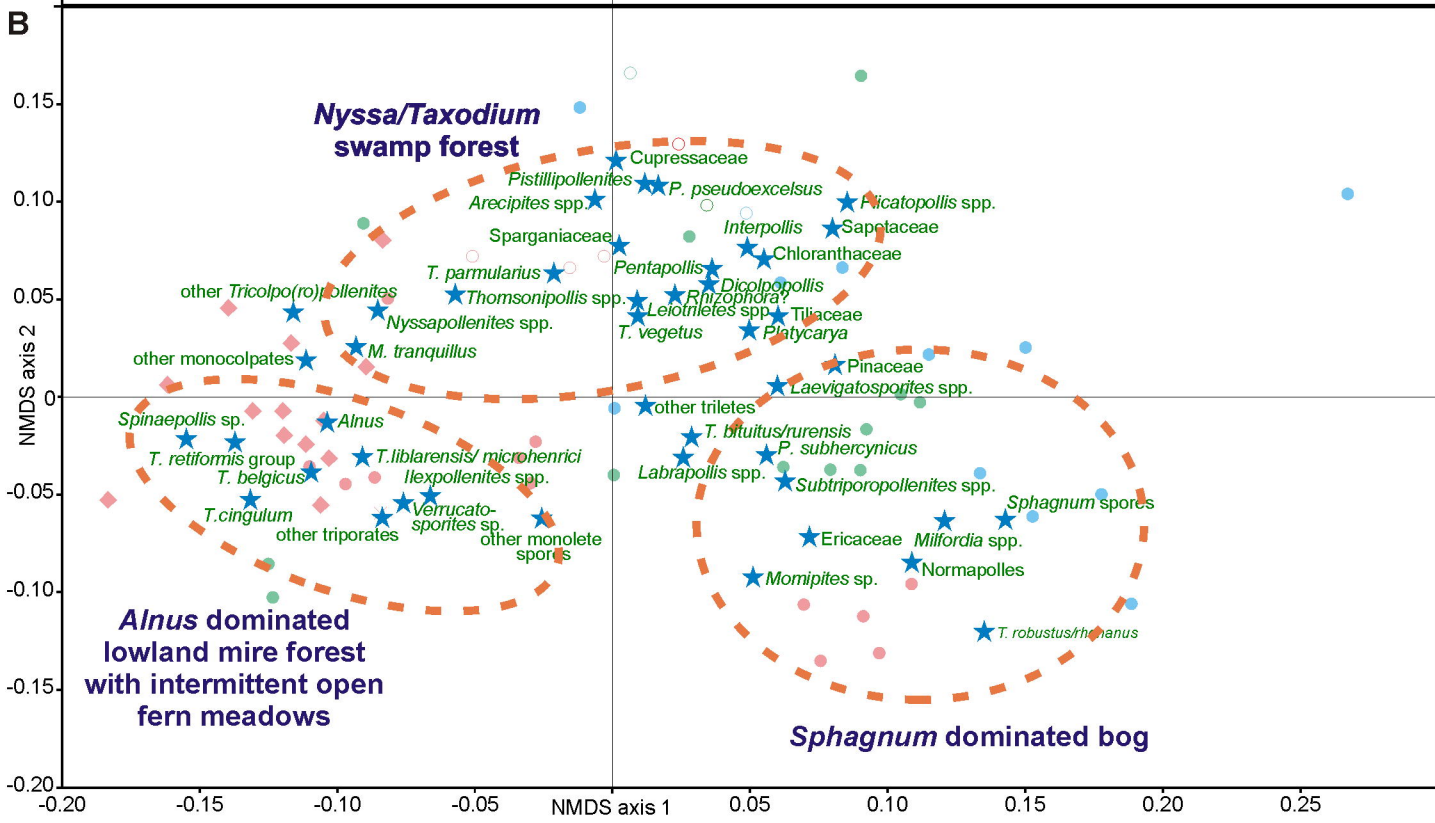

Figure 14

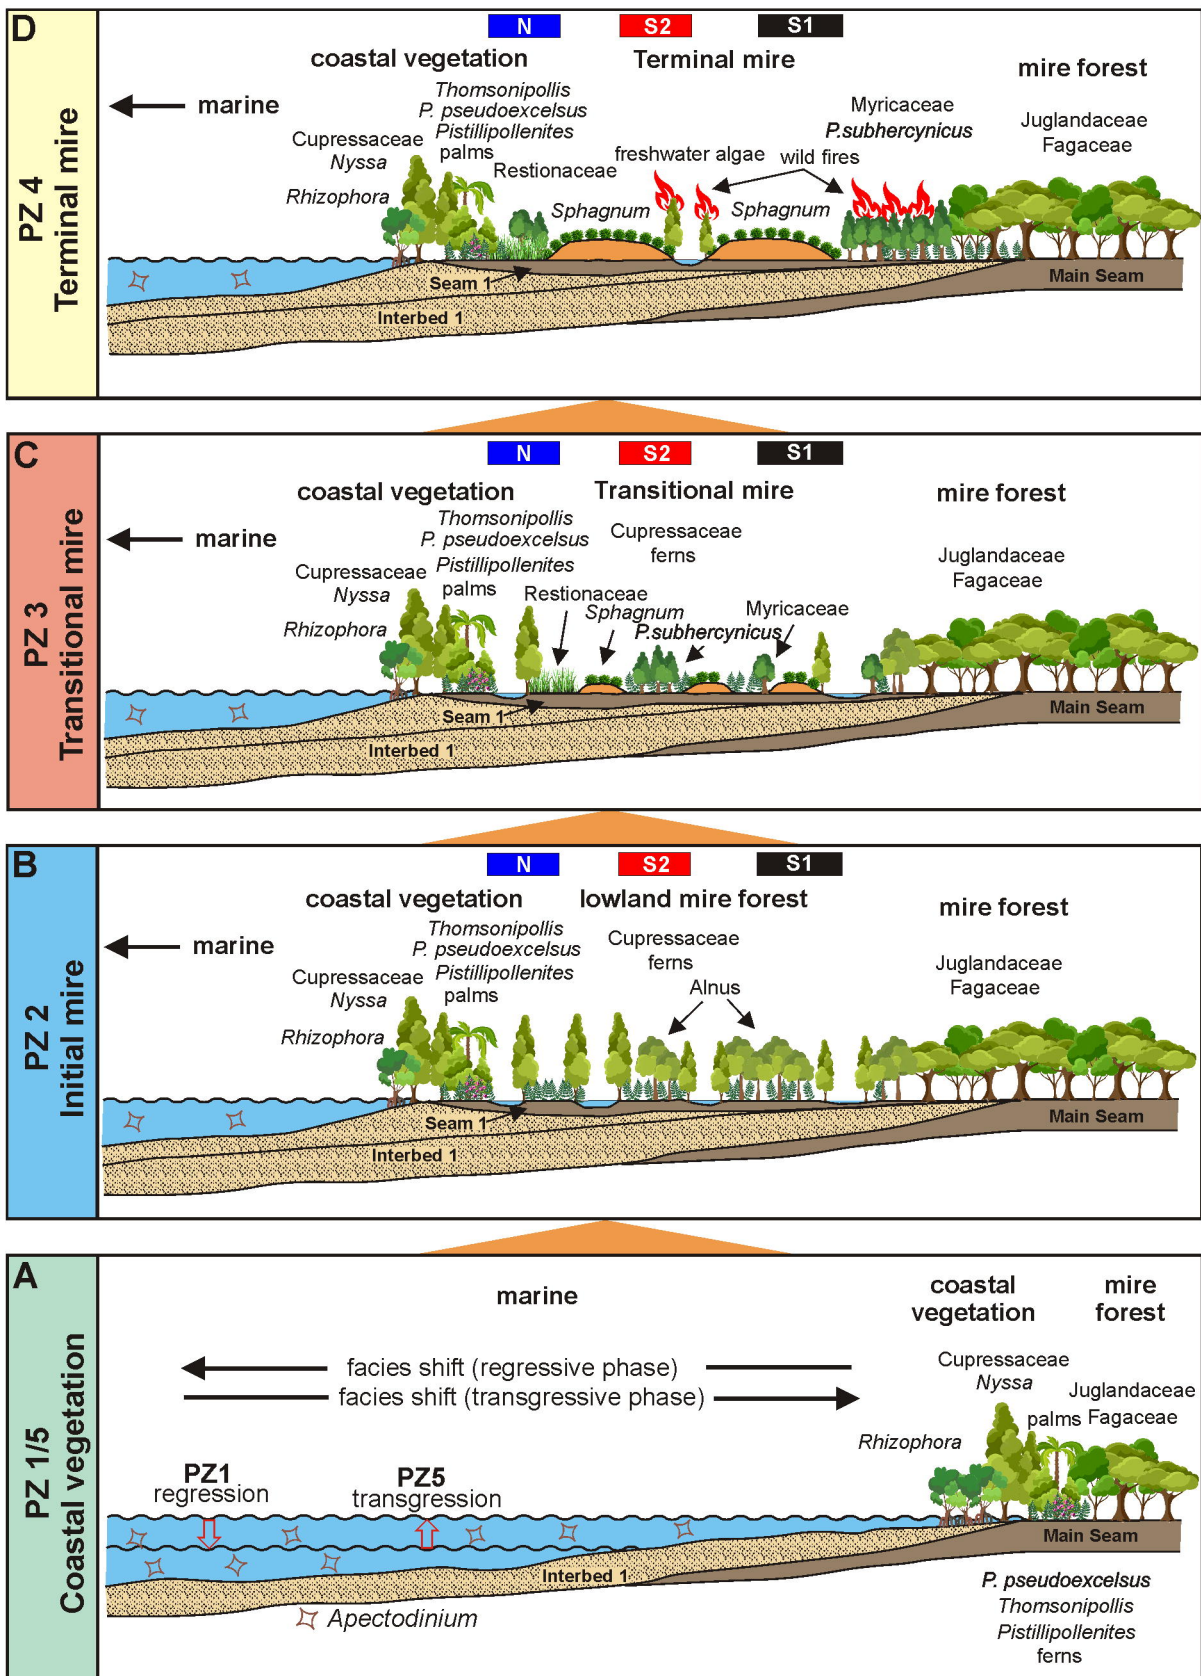

Figure 15

Section N

Section S2

Section S1

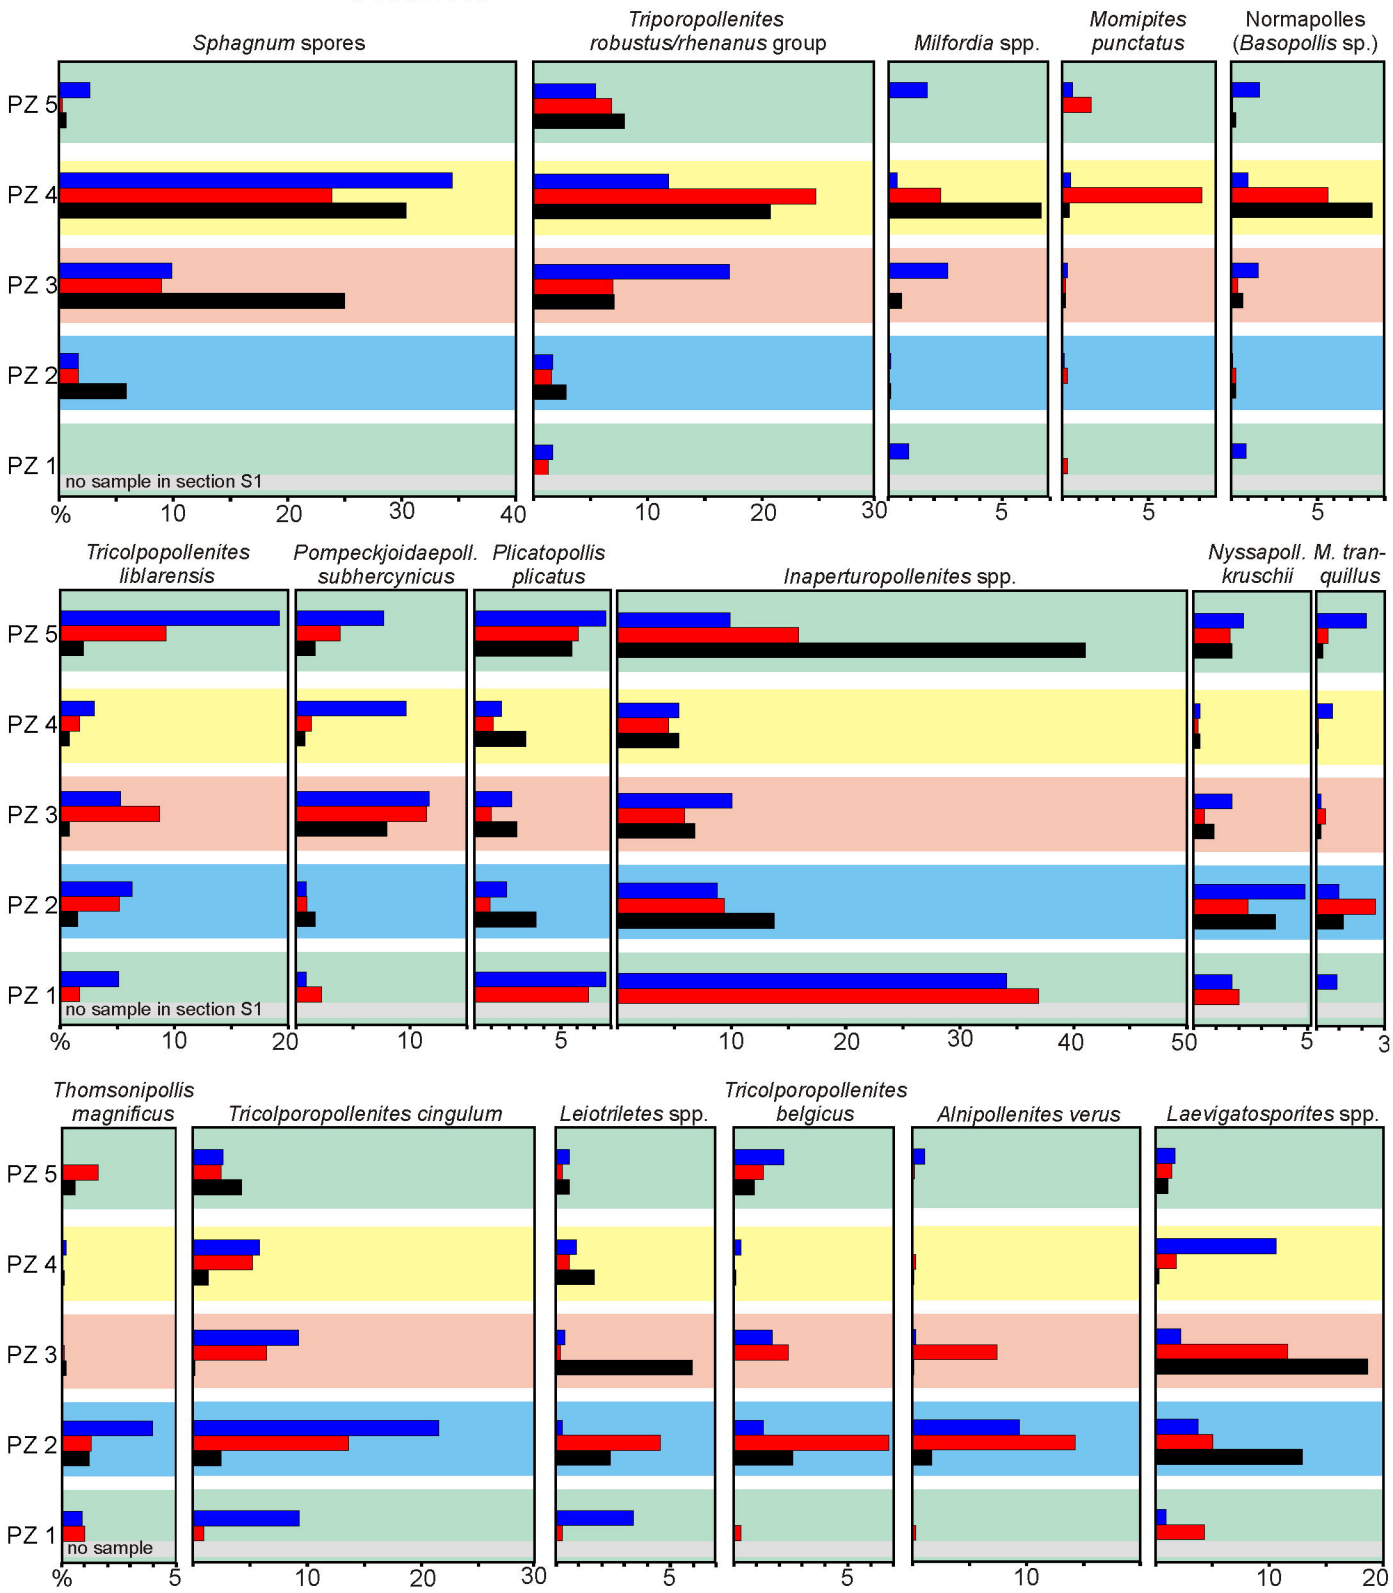

Source: https://www.biorxiv.org/content/10.1101/2020.04.24.059345v2.full.pdf
